# Supplementary material for: Diabetes mellitus and the risk of fractures at specific sites: a meta-analysis
Source: PubMed Central journal article supplement — BMJ Open. 2019 Jan 3;9(1):e024067. doi: 10.1136/bmjopen-2018-024067 (PMC6326306; doi:10.1136/bmjopen-2018-024067), 2019-01-03
Supplement: bmjopen-2018-024067.draft_revisions.pdf [file bmjopen-2018-024067.draft_revisions.pdf]

# BMJ Open

BMJ Open is committed to open peer review. As part of this commitment we make the peer review history of every article we publish publicly available.

When an article is published we post the peer reviewers' comments and the authors' responses online. We also post the versions of the paper that were used during peer review. These are the versions that the peer review comments apply to.

The versions of the paper that follow are the versions that were submitted during the peer review process. They are not the versions of record or the final published versions. They should not be cited or distributed as the published version of this manuscript.

BMJ Open is an open access journal and the full, final, typeset and author-corrected version of record of the manuscript is available on our site with no access controls, subscription charges or pay-per-view fees (<http://bmjopen.bmj.com>).

If you have any questions on BMJ Open's open peer review process please email [info.bmjopen@bmj.com](mailto:info.bmjopen@bmj.com)

# BMJ Open

## Diabetes mellitus and risk of fractures at specific sites: a meta-analysis

|                               |                                                                                                                  |
|-------------------------------|------------------------------------------------------------------------------------------------------------------|
| Journal:                      | <i>BMJ Open</i>                                                                                                  |
| Manuscript ID                 | bmjopen-2018-024067                                                                                              |
| Article Type:                 | Research                                                                                                         |
| Date Submitted by the Author: | 08-May-2018                                                                                                      |
| Complete List of Authors:     | wang, hao; the first affiliated hospital of Dalian Medical University,<br>Ba, Ying<br>Xing, Qian<br>Du, Jianling |
| Keywords:                     | diabetes mellitus, fracture, meta-analysis                                                                       |
|                               |                                                                                                                  |

SCHOLARONE™  
Manuscripts

Review only

# Diabetes mellitus and risk of fractures at specific sites: a meta-analysis

Hao Wang<sup>1</sup>, Ying Ba<sup>1</sup>, Qian Xing<sup>1</sup>, Jian-Ling Du<sup>1\*</sup>

<sup>1</sup>Department of endocrinology, the first affiliated hospital of Dalian Medical University, Dalian, Liaoning province, China, 116000

\*Corresponding author: Jian-Ling Du, Department of endocrinology, the first affiliated hospital of Dalian Medical University, Dalian, Liaoning province, China, 116000. E-mail: [dujianling63@163.com](mailto:dujianling63@163.com) or Hao Wang, Department of endocrinology, the first affiliated hospital of Dalian Medical University, Dalian, Liaoning province, China, 116000. E-mail: [wanghaodl@126.com](mailto:wanghaodl@126.com)

**Running title:** DM and fractures

**Email:**

Hao Wang: [wanghaodl@126.com](mailto:wanghaodl@126.com);

Ying Ba: [baying126@126.com](mailto:baying126@126.com);

Qian Xing: [xingqiandl@163.com](mailto:xingqiandl@163.com);

Jian-Ling Du: [dujianling63@163.com](mailto:dujianling63@163.com)

## Abstract

**Objective:** Studies have shown diabetes mellitus (DM) is associated with an increased fracture risk; however, whether this relationship differs according to different DM types, gender, and study design remains controversial.

**Design:** Meta-analysis.

**Methods:** Three electronic databases—PubMed, EMBASE, and the Cochrane Library—were searched to identify potential cohort studies from inception to March 2018. The relative risks (RRs) with 95% CIs were calculated by using a random-effects model.

**Results:** Overall, DM was associated with an increased risk of total (RR: 1.32;  $P < 0.001$ ), hip (RR: 1.77;  $P < 0.001$ ), upper arm (RR: 1.47;  $P = 0.037$ ), and ankle fractures (RR: 1.24;  $P < 0.001$ ) whereas it had no significant impact on the incidence of distal forearm and vertebrae fractures. The RR ratios suggested that compared to type 2 DM (T2DM) patients, type 1 DM (T1DM) patients had a greater risk of total (RR ratio: 1.24;  $P = 0.002$ ), hip (RR ratio: 3.43;  $P < 0.001$ ), and ankle fractures (RR ratio: 1.71;  $P = 0.029$ ). Although no other significant differences between subgroups were observed, the relationship between DM and fracture risk at different sites was different in specific populations.

**Conclusions:** DM patients had greater risks of total, hip, upper arm, and ankle fractures. Further, T1DM seems to have a more harmful effect than T2DM.

**Keywords:** diabetes mellitus; fracture; meta-analysis

**Article Summary:**

Strengths and limitations of this study:

- (1) The current study based on cohort studies, which could eliminate various confounding factors that could bias the results.
- (2) This relationship differs according to different DM types, gender, and study design were also conducted.
- (3) The large sample size of patients were included, and thus our findings are potentially more robust than are those of any individual study.
- (4) The DM ascertainment in individual studies was not consistent, which may have introduced confounders into the representative DM cohort.
- (5) The adjusted models were different across the included studies, and these factors might have played an important role in the development of fractures.

## Introduction

Diabetes mellitus (DM) is regarded as a major global public health problem, and is likely to be among the five leading causes of disease burden, with an estimated global prevalence of 4.4% by 2030 [1]. Age is an important factor and the age of a majority of DM patients is greater than 65 years [2]. Previous studies have already confirmed the harmful impact of DM on the risk of vascular outcomes [3,4], cancer at different sites [5], and renal dysfunction [6]. Due to DM, patients might have affected calcium metabolism [7], increased bone turnover [8], and reduced bone mineral density level (BMD) [9], which in turn may influence the risk of fractures in patients with DM. However, previous meta-analyses reported different strengths of association of DM with the risk of fractures in type 1 and type 2 DM [10,11], which pointed to a need to verify and evaluate the relationship between DM and fracture at other sites.

Previous studies have already illustrated the relationship between several clinical factors and the risk of fractures at different sites, in turn clinicians and patients could benefit from assessing fracture risk [12,13]. However, due to limited sample sizes, these associations in specific populations were not determined and need further verification. It is of critical importance that clinicians be able to identify DM patients and the risk of fracture at different sites in specific populations, and the preventive strategies that should be implemented in each such subset. Vestergaard conducted a meta-analysis based on 16 observational studies and found that patients with both T1DM and T2DM were associated with an increased risk of hip fracture, and BMD increased in T2DM but decreased in T1DM. However, fracture at other sites and differences among gender and study design were not separately studied [10]. Fan et al. indicated that DM patients had a greater risk of hip fractures than did those without DM, and this association was more pronounced in patients with T1DM [11]. Two problems should be highlighted in this study: (1) although random-effect models were used due to higher heterogeneity, the summary results of the subsets in individual studies should be pooled first based on heterogeneity; and (2) the relationship between DM and the risk of fracture at other sites,

1  
2  
3 including total, distal forearm, upper arm, ankle, and vertebrae fractures, should be  
4  
5 calculated. Therefore, we conducted this study to determine whether the relationship  
6  
7 between DM and fracture at different sites is different in specific populations.  
8  
9

## 10 **Material and methods**

### 11 **Search strategy and inclusion criteria**

12  
13 The meta-analysis was performed according to the Preferred Reporting Items for  
14  
15 Systematic Reviews and Meta-Analysis statement (Checklist S1) [14]. PubMed, EMBASE,  
16  
17 and the Cochrane Library were searched for studies since their inceptions to March 2018,  
18  
19 and the following core search terms were used: ("diabetes" OR "diabetes mellitus" OR  
20  
21 "glucose") AND ("fractures, spontaneous" OR "hip fractures" OR "osteoporotic fractures"  
22  
23 OR "fractures, compression" OR "spinal fractures" OR "fracture") AND ("epidemiologic  
24  
25 study" OR "cohort"). We restricted the search to include only studies published in English.  
26  
27 Further, we performed manual searches of reference lists from potentially relevant  
28  
29 studies to identify additional eligible studies. Article, study design, exposure, and  
30  
31 fractures at different sites were used to identify potential studies.  
32  
33

34 The literature search and study selection process was conducted by 2 authors  
35  
36 independently using a standardized approach. Any inconsistency was resolved by group  
37  
38 discussion until a consensus was reached. Study inclusion criteria are listed as follows: (1)  
39  
40 the study had to have a cohort design, whether prospective or retrospective; (2)  
41  
42 participants with DM, whether T1DM or T2DM; and (3) the studies should report effect  
43  
44 estimates for comparisons of DM and non-DM and the risk of fracture at different sites.  
45  
46 We excluded all case-control studies due to various confounding factors that could bias  
47  
48 the results.  
49

### 50 **Data Collection and Quality Assessment**

51  
52 Data extraction and quality assessment were conducted independently by 2 authors.  
53  
54 Information was examined and adjudicated independently by an additional author by  
55  
56 referring to the original studies. The data abstracted included the first author or study  
57  
58

1  
2  
3 group's name, publication year, country, study design, sample size, mean age, percentage  
4 of male, number of DM patients, percentage of current smoker, mean body mass index  
5 (BMI), follow-up duration, and adjusted factors. The outcome variable was abstracted  
6 using the effect estimate with corresponding 95% confidence intervals (CIs). If the study  
7 reported several multivariable adjusted effect estimates, the effect estimate was  
8 maximally adjusted to account for potential confounders. The Newcastle-Ottawa Scale  
9 (NOS) was used to evaluate methodological quality, which has been validated by  
10 evaluating the quality of observational studies in meta-analyses [15]. The NOS was based  
11 on selection (4 items with a total of 4 stars), comparability (1 item with a total of 2 stars),  
12 and outcome (3 items with a total of 3 stars) with a total of 9 stars that were developed for  
13 assessment.

### 24 **Statistical Analysis**

25  
26 The relationship between DM and the subsequent risk of fractures at different sites was  
27 based on effect estimates and corresponding 95% CIs in each study. We first used the  
28 fixed-effect model to calculate the summary RR and 95% CI for the relationship between  
29 DM and fractures in individual studies [16]. We then combined the RRs of fracture risk in  
30 DM versus non-DM patients by using a random-effects model [17]. Heterogeneity among  
31 the included studies was investigated using I-square and Q statistic, and a P value less  
32 than 0.10 was considered to indicate significant heterogeneity [18,19]. Sensitivity  
33 analyses were conducted by removing each individual study from the overall analysis  
34 [20]. Stratified analyses were conducted for total, hip, distal forearm, upper arm, ankle,  
35 and vertebrae fractures based on DM types, gender, and study design. The ratio of RR  
36 and its 95% CI was estimated by using specific RR and 95% CI according to the DM types,  
37 gender, and study design [21,22]. Funnel plot, Egger [23], and Begg [24] tests were used  
38 to evaluate publication bias for total fractures. P values were 2-sided, and if they were less  
39 than 0.05, they were considered statistically significant across included studies.  
40  
41 Statistical analyses were conducted using STATA software (version 12.0; Stata  
42 Corporation, College Station, TX, USA).



## Results

### Search of the Published Literature

A total of 684 articles were identified from our electronic search, of which 602 studies were excluded due to duplication, irrelevance, and other design issues. We retrieved the full text for the remaining 59 studies and 25 cohort studies were selected for the final analysis after detailed evaluations [25-49]. The manual search of the reference lists of relevant reviews did not yield new eligible studies. The results of the study selection process are shown in Fig 1, and the general characteristics of the included studies are presented in Table 1.

Table 1. Baseline characteristic of studies included

| Study        | Publication year | Country   | Study design | Sample size | Mean age (yr) | Per male (%) | Number of DM | Current smoker (%) | BMI (kg/m <sup>2</sup> ) | Follow-up (yr) | Adjusted factors                                                                                                               |
|--------------|------------------|-----------|--------------|-------------|---------------|--------------|--------------|--------------------|--------------------------|----------------|--------------------------------------------------------------------------------------------------------------------------------|
| CHS [25]     | 2011             | US        | Pro          | 5641        | 72.8          | 42.0         | 1456         | 12.0               | 26.7                     | 10.9           | Age, sex, race, BMI, AAI<0.9                                                                                                   |
| Jung [26]    | 2012             | Korea     | Retro        | 2282        | 61.0          | 0.0          | 1268         | NA                 | <25.0                    | 7.0            | Age                                                                                                                            |
| FRAILCO [27] | 2016             | Sweden    | Pro          | 428305      | 80.8          | 42.4         | 84702        | NA                 | 25.4                     | 1.3            | Age, sex, weight, height, previous fracture, RA, glucocorticoid, alendronate use, and CCI, and self-reported known fall injury |
| Dobnig [28]  | 2006             | Australia | Pro          | 1664        | >70.0         | 0.0          | 583          | NA                 | NA                       | 2.0            | Age and weight                                                                                                                 |
| H-EPESE [29] | 2002             | US        | Pro          | 2884        | 71.8          | 42.1         | 690          | 42.1               | NA                       | 7.0            | Age, gender, BMI, ever smoked, previous stroke, lower extremity functional ability, and distance vision                        |
| FWHS [30]    | 2001             | US        | Pro          | 32089       | 61.6          | 0.0          | 1729         | 15.0               | 26.9                     | 9.6            | Age, smoking, estrogen use, BMI, and WTHR                                                                                      |
| SCI-DC [31]  | 2014             | UK        | Retro        | 3801874     | 20.0-84.0     | NA           | 201874       | NA                 | NA                       | NA             | Age, calendar year, SIMD, and for the overall estimate, an SIMD-age interaction                                                |
| SIDIAP [32]  | 2015             | Spain     | Pro          | 171931      | 62.6          | 56.5         | 58483        | 15.6               | 29.3                     | 2.6            | BMI, previous fracture, oral corticoids                                                                                        |
| THIN [33]    | 2015             | UK        | Retro        | 334266      | 34.0          | 56.1         | 30394        | 26.7               | 25.5                     | 5.7            | Exposure to steroid medication, history of prior fracture, and presence of chronic kidney disease                              |
| NHS [34]     | 2006             | US        | Pro          | 109983      | 56.3          | 0.0          | 8640         | 17.9               | 26.0                     | 20.0           | Age, BMI, physical activity, menopausal status and estrogen use, smoking and daily intake of calcium, vitamin D, and protein   |

|    |               |      |           |       |        |           |      |        |      |      |      |                                              |
|----|---------------|------|-----------|-------|--------|-----------|------|--------|------|------|------|----------------------------------------------|
| 1  |               |      |           |       |        |           |      |        |      |      |      |                                              |
| 2  |               |      |           |       |        |           |      |        |      |      |      |                                              |
| 3  |               |      |           |       |        |           |      |        |      |      |      |                                              |
| 4  |               |      |           |       |        |           |      |        |      |      |      |                                              |
| 5  |               |      |           |       |        |           |      |        |      |      |      |                                              |
| 6  |               |      |           |       |        |           |      |        |      |      |      |                                              |
| 7  | The           | 2013 | Netherla  | Pro   | 4135   | 68.4      | 40.6 | 420    | 25.0 | 26.4 | 12.2 | Age, sex, height, weight, and femoral neck   |
| 8  | Rotterdam     |      | nd        |       |        |           |      |        |      |      |      | BMD                                          |
| 9  | Study [35]    |      |           |       |        |           |      |        |      |      |      |                                              |
| 10 | The Tromsø    | 2006 | Norway    | Pro   | 27159  | 47.0      | 47.7 | 455    | 37.0 | 25.5 | 6.0  | Age, BMI, smoking, and metabolic             |
| 11 | study [36]    |      |           |       |        |           |      |        |      |      |      | features                                     |
| 12 | Swedish       | 2005 | Sweden    | Retro | 24605  | 20.7      | 51.0 | 24605  | NA   | NA   | 9.9  | Age, sex, and calendar-period-               |
| 13 | Inpatient     |      |           |       |        |           |      |        |      |      |      | matched                                      |
| 14 | Register [37] |      |           |       |        |           |      |        |      |      |      | general population from the entire           |
| 15 |               |      |           |       |        |           |      |        |      |      |      | Swedish inpatient registry                   |
| 16 | The Blue      | 2001 | Australia | Pro   | 3654   | 66.2      | 43.3 | 216    | NA   | NA   | 5.0  | Age, sex, and BMI                            |
| 17 | Mountains     |      |           |       |        |           |      |        |      |      |      |                                              |
| 18 | Eye Study     |      |           |       |        |           |      |        |      |      |      |                                              |
| 19 | [38]          |      |           |       |        |           |      |        |      |      |      |                                              |
| 20 | Singapore     | 2010 | Singapor  | Pro   | 63257  | 56.4      | 44.3 | 5668   | 19.4 | NA   | 12.0 | Age at recruitment, sex, year of             |
| 21 | Chinese       |      | e         |       |        |           |      |        |      |      |      | recruitment, dialect group, level of         |
| 22 | Health Study  |      |           |       |        |           |      |        |      |      |      | education, weekly vigorous work or           |
| 23 | [39]          |      |           |       |        |           |      |        |      |      |      | strenuous sports, BMI, smoking status,       |
| 24 |               |      |           |       |        |           |      |        |      |      |      | total calcium intake from food and           |
| 25 |               |      |           |       |        |           |      |        |      |      |      | supplement, total soy isoflavone intake,     |
| 26 |               |      |           |       |        |           |      |        |      |      |      | and self-reported stroke.                    |
| 27 | Meyer [40]    | 1993 | Norway    | Pro   | 52313  | 35.0-49.0 | 51.6 | 288    | 16.9 | NA   | 10.9 | Age, height, BMI, physical activity, stroke, |
| 28 |               |      |           |       |        |           |      |        |      |      |      | receipt of a disability pension, marriage,   |
| 29 |               |      |           |       |        |           |      |        |      |      |      | and smoking                                  |
| 30 | Eipscombe     | 2007 | Canada    | Retro | 598812 | >66.0     | 50.6 | 197412 | NA   | NA   | 6.1  | Age, chronic unstable disease, prior         |
| 31 | [41]          |      |           |       |        |           |      |        |      |      |      | stroke, visual impairment, neuropathy,       |
| 32 |               |      |           |       |        |           |      |        |      |      |      | amputation, treatment with nitrates,         |
| 33 |               |      |           |       |        |           |      |        |      |      |      |                                              |
| 34 |               |      |           |       |        |           |      |        |      |      |      |                                              |
| 35 |               |      |           |       |        |           |      |        |      |      |      |                                              |
| 36 |               |      |           |       |        |           |      |        |      |      |      |                                              |
| 37 |               |      |           |       |        |           |      |        |      |      |      |                                              |
| 38 |               |      |           |       |        |           |      |        |      |      |      |                                              |
| 39 |               |      |           |       |        |           |      |        |      |      |      |                                              |
| 40 |               |      |           |       |        |           |      |        |      |      |      |                                              |
| 41 |               |      |           |       |        |           |      |        |      |      |      |                                              |
| 42 |               |      |           |       |        |           |      |        |      |      |      |                                              |
| 43 |               |      |           |       |        |           |      |        |      |      |      |                                              |
| 44 |               |      |           |       |        |           |      |        |      |      |      |                                              |
| 45 |               |      |           |       |        |           |      |        |      |      |      |                                              |
| 46 |               |      |           |       |        |           |      |        |      |      |      |                                              |
| 47 |               |      |           |       |        |           |      |        |      |      |      |                                              |

1  
2  
3  
4  
5  
6  
7  
8  
9  
10  
11  
12  
13  
14  
15  
16  
17  
18  
19  
20  
21  
22  
23  
24  
25  
26  
27  
28  
29  
30  
31  
32  
33  
34  
35  
36  
37  
38  
39  
40  
41  
42  
43  
44  
45  
46  
47

For peer review only

statins, thiazides, estrogen, anticonvulsants, inhaled corticosteroids, and medications increasing falling risk, and history of BMD test

Age, BMI, calcaneal BMD, or a host of other osteoporosis risk factors

Age, BMI and daily smoking

Age, BMI, DBP, resting pulse rate, triglyceride level, gamma-glutamyltransferase, smoking, poor self-rated health, sedimentation rate for women, and cholesterol or creatinine for men

Age; ethnicity; weight; height; time-dependent history of falls; previous fracture; history of osteoporosis; trouble seeing at baseline; alcohol or tobacco use; calcium and vitamin D intake; exercise; bisphosphonate, estrogen, steroid, insulin, SERM, or thyroid hormone use

Age, sex, income quintile, area of residence and ethnicity

|                                   |      |        |       |        |           |      |       |      |    |                                 |
|-----------------------------------|------|--------|-------|--------|-----------|------|-------|------|----|---------------------------------|
| Melton [42]                       | 2008 | US     | Retro | 1964   | 61.7      | 51.0 | 1964  | NA   | NA | 11.8                            |
| Nord-Trøndelag Health Survey [43] | 1999 | Norway | Pro   | 35444  | 50.0-74.0 | 47.5 | 1850  | 30.4 | NA | 9.0                             |
| Malmö Preventive Project [44]     | 2006 | Sweden | Pro   | 33346  | 27.0-61.0 | 67.3 | 166   | NA   | NA | 16.0 for men and 11.0 for women |
| WHI [45]                          | 2006 | US     | Pro   | 93676  | 63.4      | 0.0  | 5285  | 6.2  | NA | 7.0                             |
| Leslie [46]                       | 2007 | Canada | Retro | 318776 | 58.0      | 50.0 | 82094 | NA   | NA | 10.0                            |

1  
2  
3  
4  
5  
6  
7  
8  
9  
10  
11  
12  
13  
14  
15  
16  
17  
18  
19  
20

|               |      |        |       |        |      |      |        |    |      |     |                                                                                                                                                                                                                                                |
|---------------|------|--------|-------|--------|------|------|--------|----|------|-----|------------------------------------------------------------------------------------------------------------------------------------------------------------------------------------------------------------------------------------------------|
| Majumdar [47] | 2016 | Canada | Retro | 57938  | 64.3 | 0.0  | 8840   | NA | 27.1 | 7.2 | FRAX scores, burden of comorbidity, falls, prescription osteoporosis treatments, and insulin therapy                                                                                                                                           |
| SOF [48]      | 2001 | US     | Pro   | 9754   | 71.0 | 0.0  | 657    | NA | 26.2 | 9.4 | Age, BMI, calcaneal BMD, height, height loss since age 25, contrast sensitivity, walking speed, consumed alcohol in past year, resting pulse, mother fractured hip, on feet <4 h a day, use of long-acting benzodiazepines, and calcium intake |
| Chen [49]     | 2008 | China  | Retro | 969820 | 60.0 | 47.0 | 484787 | NA | NA   | 6.0 | Age as a continuous variable, geographic area, and urbanization status                                                                                                                                                                         |

---

\*DM: diabetes mellitus; Yr: year; Per: percentage; Pro: prospective; Retro: retrospective; BMI: body mass index; AAI: ankle-armindex; NA: not available; RA: rheumatoid arthritis; CCI: Charlson comorbidity index; WTHR: waist-to-hip ratio; SIMD: Scottish Index of Multiple Deprivation;

For peer review only

44  
45  
46  
47

## Study Characteristics

Of the 25 included studies, 16 had a prospective cohort design [25,27-30,32,34-36,38-40,43-45,48], and the remaining 9 studies had a retrospective cohort design [26,31,33,37,41,42,46,47]. The sample size ranged from 1,664 to 3,801,874, while the number of DM patients ranged from 166 to 484,787. Twelve studies were conducted in the US, Australia, or Canada [25,28-30,34,38,41,42,45-48]; 10 in Europe [27,31-33,35-37,40,43,44]; and the remaining 3 in Asia [26,39,49]. The results of total fractures were available in 12 studies, hip fracture in all studies, distal forearm fracture in 8 studies, upper arm fracture in 6 studies, ankle fracture in 4 studies, and vertebrae fractures in 6 studies. Study quality was evaluated by NOS, and a study with 7 or more stars was regarded as a high-quality study. Overall, 7 studies had a score of 9, 8 studies had a score of 8, 6 studies had a score of 7, and the remaining 4 studies had a score of 6 (S1 Table).

## Total fractures

A total of 12 studies reported an association between DM and the risk of total fractures. The summary RR indicated that compared with non-DM individuals, DM patients were associated with an increased risk of total fractures (RR: 1.32; 95% CI: 1.17-1.48;  $P < 0.001$ ; Fig 2), and substantial heterogeneity was detected ( $I^2 = 97.1\%$ ;  $P < 0.001$ ). A sensitivity analysis was conducted and the conclusion was not affected by the sequential exclusion of individual studies from the overall analysis (S2 Table). A subgroup analysis for total fractures based on DM types, gender, and study design was performed. Results showed that patients with DM had increased risk of total fractures in all of subsets (Table 2). Further, the ratio of RR of the comparison between T1DM and T2DM for the risk of total fractures significantly increased and the association was statistically significant (ratio of RR: 1.24; 95% CI: 1.08-1.41;  $P = 0.002$ ; Table 2).

1  
2  
3  
4  
5  
6  
7  
8  
9  
10  
11  
12  
13  
14  
15  
16  
17  
18  
19  
20  
21  
22  
23  
24  
25  
26  
27  
28  
29  
30  
31  
32  
33  
34  
35  
36  
37  
38  
39  
40  
41  
42  
43  
44  
45  
46  
47

Table 2. Subgroup analyses based on DM types, gender, and study design

| Fracture sites | Factors      | Subsets       | RR and 95%CI     | P value | I <sup>2</sup> (%) | P value for heterogeneity | Ratio of RR between subgroups | P value for ratios of RR |
|----------------|--------------|---------------|------------------|---------|--------------------|---------------------------|-------------------------------|--------------------------|
| All            | DM types     | I             | 1.51 (1.35-1.68) | <0.001  | 78.3               | <0.001                    | 1.24 (1.08-1.41)              | 0.002                    |
|                |              | II            | 1.22 (1.13-1.31) | <0.001  | 83.0               | <0.001                    |                               |                          |
|                | Gender       | Men           | 1.49 (1.20-1.85) | <0.001  | 96.1               | <0.001                    | 1.14 (0.89-1.46)              | 0.313                    |
|                |              | Women         | 1.31 (1.16-1.49) | <0.001  | 92.8               | <0.001                    |                               |                          |
|                | Study design | Prospective   | 1.32 (1.20-1.46) | <0.001  | 83.4               | <0.001                    | 1.01 (0.84-1.21)              | 0.936                    |
|                |              | Retrospective | 1.31 (1.12-1.54) | 0.001   | 97.6               | <0.001                    |                               |                          |
| Hip            | DM types     | I             | 4.35 (2.91-6.49) | <0.001  | 95.4               | <0.001                    | 3.43 (2.27-5.17)              | <0.001                   |
|                |              | II            | 1.27 (1.16-1.39) | <0.001  | 85.5               | <0.001                    |                               |                          |
|                | Gender       | Men           | 2.05 (1.68-2.51) | <0.001  | 97.0               | <0.001                    | 1.00 (0.78-1.29)              | 0.969                    |
|                |              | Women         | 2.04 (1.76-2.37) | <0.001  | 97.5               | <0.001                    |                               |                          |
|                | Study design | Prospective   | 2.02 (1.71-2.39) | <0.001  | 91.4               | <0.001                    | 1.09 (0.87-1.36)              | 0.472                    |
|                |              | Retrospective | 1.86 (1.60-2.16) | <0.001  | 98.7               | <0.001                    |                               |                          |
| Distal forearm | DM types     | I             | 1.09 (0.43-2.75) | 0.861   | 78.3               | 0.032                     | 1.12 (0.43-2.94)              | 0.812                    |
|                |              | II            | 0.97 (0.66-1.09) | 0.573   | 13.1               | 0.323                     |                               |                          |
|                | Gender       | Men           | 1.04 (0.66-1.65) | 0.863   | 58.5               | 0.090                     | 1.12 (0.70-1.80)              | 0.644                    |

|           |              |               |                  |        |      |        |                   |       |
|-----------|--------------|---------------|------------------|--------|------|--------|-------------------|-------|
|           |              | Women         | 0.93 (0.82-1.05) | 0.257  | 6.3  | 0.380  |                   |       |
|           | Study design | Prospective   | 1.00 (0.83-1.19) | 0.982  | 41.0 | 0.094  | 0.93 (0.69-01.27) | 0.662 |
|           |              | Retrospective | 1.07 (0.84-1.37) | 0.565  | 0.0  | 0.944  |                   |       |
| Upper arm | DM types     | I             | 1.83 (1.41-2.39) | <0.001 | 0.0  | 0.487  | 1.19 (0.82-1.72)  | 0.359 |
|           |              | II            | 1.54 (1.19-1.99) | 0.001  | 79.6 | <0.001 |                   |       |
|           | Gender       | Men           | 1.21 (0.80-1.83) | 0.368  | 73.2 | 0.011  | 0.82 (0.50-1.36)  | 0.450 |
|           |              | Women         | 1.47 (1.10-1.96) | 0.009  | 79.1 | <0.001 |                   |       |
|           | Study design | Prospective   | 1.38 (1.07-1.76) | 0.011  | 76.0 | <0.001 | 0.80 (0.47-1.36)  | 0.412 |
|           |              | Retrospective | 1.72 (1.08-2.73) | 0.022  | 68.5 | 0.075  |                   |       |
| Ankle     | DM types     | I             | 1.97 (1.24-3.14) | 0.004  | 29.3 | 0.234  | 1.71 (1.06-2.78)  | 0.029 |
|           |              | II            | 1.15 (1.01-1.31) | 0.029  | 0.0  | 0.886  |                   |       |
|           | Gender       | Men           | 1.35 (0.68-2.65) | 0.390  | 74.1 | 0.021  | 0.96 (0.46-2.01)  | 0.922 |
|           |              | Women         | 1.40 (1.07-1.84) | 0.014  | 51.6 | 0.083  |                   |       |
|           | Study design | Prospective   | 1.24 (1.10-1.40) | <0.001 | 0.0  | 0.400  | -                 | -     |
|           |              | Retrospective | -                | -      | -    | -      |                   |       |
| Vertebrae | DM types     | I             | -                | -      | -    | -      | -                 | -     |
|           |              | II            | 1.74 (0.96-3.16) | 0.070  | 96.7 | <0.001 |                   |       |



1  
2  
3  
4  
5  
6  
7  
8  
9  
10  
11  
12  
13  
14  
15  
16  
17  
18  
19  
20  
21  
22  
23  
24  
25  
26  
27  
28  
29  
30  
31  
32  
33  
34  
35  
36  
37  
38  
39  
40  
41  
42  
43  
44  
45  
46  
47

|              |               |                   |       |      |        |                  |       |
|--------------|---------------|-------------------|-------|------|--------|------------------|-------|
| Gender       | Men           | 2.26 (0.40-12.73) | 0.354 | 88.9 | 0.003  | 1.42 (0.23-8.85) | 0.706 |
|              | Women         | 1.59 (0.88-2.87)  | 0.125 | 84.1 | <0.001 |                  |       |
| Study design | Prospective   | 1.36 (0.88-2.11)  | 0.167 | 66.4 | 0.018  | 0.54 (0.25-1.14) | 0.105 |
|              | Retrospective | 2.54 (1.37-4.70)  | 0.003 | 96.1 | <0.001 |                  |       |

For peer review only

## Hip fracture

A total of 25 studies reported an association between DM and the risk of hip fracture. In the pooled analysis, the comparison of DM and non-DM participants showed a harmful effect on hip fracture (RR: 1.77; 95% CI: 1.56-2.02;  $P < 0.001$ ; Fig 3). Although substantial heterogeneity was detected across the included studies ( $I^2 = 98.0\%$ ;  $p < 0.001$ ), the conclusion did not change after sequential exclusion of individual studies (S3 Table). The results of the subgroup analysis for hip fracture are listed in Table 2, and all of results indicated DM had a harmful effect on hip fracture. Furthermore, the ratio of RR showed a statistically significant association between DM and the risk of hip fracture in T1DM when compared with T2DM (ratio of RR: 3.43; 95% CI: 2.27-5.17;  $P < 0.001$ ).

## Distal forearm fracture

A total of 8 studies reported an association between DM and the risk of distal forearm fracture. The summary RR showed that patients with DM were not associated with the risk of distal forearm fracture (RR: 1.02; 95% CI: 0.88-1.19;  $P = 0.809$ ; Fig 4), and non-significant heterogeneity was observed ( $I^2 = 27.5\%$ ;  $p = 0.209$ ). The sensitivity analysis suggested that the conclusion was not affected by the exclusion of any specific study (S4 Table). The subgroup analysis indicated the conclusions in each subset continued to be non-significant and no significant differences were observed between subgroups based on DM types, gender, and study design (Table 2).

## Upper arm fracture

A total of 6 studies reported an association between DM and the risk of upper arm fracture. We noted DM patients were associated with higher risk of upper arm fracture as compared with non-DM individuals (RR: 1.47; 95% CI: 1.02-2.10;  $P = 0.037$ ; Fig 5), and evidence of significant heterogeneity was seen ( $I^2 = 84.9\%$ ;  $p < 0.001$ ). The sensitivity analysis indicated the results varied possibly due to the smaller number of studies on fractures occurring in the upper arm (S5 Table). The subgroup analysis indicated DM had no significant impact on upper arm fracture in men, whereas this risk increased in other subsets (Table 2).

### **Ankle fracture**

A total of 4 studies reported an association between DM and the risk of ankle fracture. The risk of ankle fracture significantly increased in DM patients (RR: 1.24; 95% CI: 1.10-1.40;  $P < 0.001$ ; Fig 6), and no evidence of heterogeneity existed ( $I^2 = 0.0\%$ ;  $p = 0.400$ ). The results of the sensitivity analysis were consistent with those of the overall analysis and are shown in S6 Table. The subgroup analysis showed no association between DM and ankle fracture risk in men, whereas in other subsets, the risk increased and was statistically significant (Table 2). Further, T1DM patients were at a greater ankle fracture risk than were T2DM patients (ratio of RR: 1.71; 95% CI: 1.06-1.78;  $P = 0.029$ ; Table 2).

### **Vertebrae fracture**

A total of 6 studies reported an association between DM and the risk of vertebrae fracture. The results of pooled analysis indicated that there was no significant association between DM and vertebrae fracture risk (RR: 1.56; 95% CI: 0.78-3.12;  $P = 0.209$ ; Fig 7), and potential evidence of significant heterogeneity was seen ( $I^2 = 96.3\%$ ;  $P < 0.001$ ). As a result, a sensitivity analysis was conducted and although each study was sequentially excluded from the pooled analysis, the conclusion was not affected by the exclusion of any specific study (S7 Table). The subgroup analysis indicated DM was associated with an increased risk of vertebrae fracture in retrospective cohort studies, whereas no significant effect in other subsets and no difference between subgroups were observed (Table 2).

### **Publication bias**

Review of the funnel plots could not rule out the publication bias for total fractures (Fig 8). Further, the Egger and Begg test results showed no evidence of a publication bias ( $P$  value for Egger: 0.311;  $P$  value for Begg: 0.537).

### **Discussion**

Because the characteristics of DM patients might have affected the incidence of fracture at different sites, we considered cohort studies to evaluate the correlations between DM and fractures according to DM types, gender, and study design. The meta-analysis

1  
2  
3 included 7,185,572 participants from 16 prospective cohort studies and 9 retrospective  
4 cohort studies with a broad range of individual characteristics. The findings of this study  
5 indicated DM was associated with an elevated risk of total, hip, upper arm, and ankle  
6 fractures, but had no effect on distal forearm and vertebrae fractures. Mostly, the findings  
7 of subgroup analyses were consistent with those of the overall analysis except for those of  
8 upper arm and ankle fractures in men. Finally, T1DM was associated with a greater risk  
9 of total fractures, hip fracture, and ankle fracture risk than T2DM was.

10  
11 A previous study based on 14 observational studies evaluated the relationship between  
12 T1DM and the risk of fractures [50]. It indicated T1DM was associated with a higher risk  
13 of total fractures (RR, 3.16;  $P=0.002$ ), hip fractures (RR, 3.78;  $P<0.001$ ), and spinal  
14 fractures (RR, 2.88;  $P<0.001$ ). Further, different study designs might bias this  
15 relationship and the role of T2DM was not evaluated in this study. Similar limitations of  
16 two other meta-analyses have already been mentioned [10,11]. The major strengths of  
17 this study included the comprehensive inclusion of cohort studies with a large sample  
18 size and broad characteristics of DM patients. The large sample size ensured the stability  
19 of our conclusions, and the broad characteristics ensured the applicability of the  
20 summary results.

21  
22 The pooled results showed a significantly increased risk of total, hip, upper arm, and  
23 ankle fractures for DM patients compared with that in non-DM individuals; this result is  
24 consistent with those of previous studies [10,11,50]. However, several studies reported  
25 inconsistent results. Strotmeyer et al. [25] indicated after adjusting for BMI, sex, race,  
26 and age, T2DM had no significant effect on the risk of hip fracture. Jung et al [26]  
27 showed the RR in the T2DM cohort increased the risk of total and hip fractures, though  
28 these increases were not statistically significant. One possible explanation for this could  
29 be the percentage of patients newly diagnosed with DM that might be higher than that in  
30 other studies and the increase in insulin level might affect bone metabolism [51]. Further,  
31 a smaller sample size and a lower incidence of fracture events were associated with lower  
32 statistical power and acquired broad 95% CI. Finally, the summary results for upper arm  
33  
34  
35  
36  
37  
38  
39  
40  
41  
42  
43  
44  
45  
46  
47  
48  
49  
50  
51  
52  
53  
54  
55  
56  
57  
58  
59  
60

1  
2  
3 and ankle fractures might have varied due to the few studies included and potential  
4  
5 confounding factors that could be explored.  
6

7 There were no significant differences between DM patients and non-DM individuals with  
8  
9 regard to distal forearm fracture. Most individual studies reported similar results,  
10  
11 whereas the FRAILCO study indicated DM patients were associated with a lower risk of  
12  
13 distal forearm fracture [27]. The reason could be the main role of this decrease in patients  
14  
15 with oral antidiabetics compared with non-DM individuals. Further, the incidence of  
16  
17 distal forearm fracture might be underestimated in register based data. Finally, distal  
18  
19 forearm fractures usually develop earlier in life, and the age of the participants in the  
20  
21 individual studies might play a confounding role. Similar results were found for vertebrae  
22  
23 fractures. Two of the included studies indicated T2DM was associated with a higher risk  
24  
25 of vertebrae fractures [42,44]. We could speculate that higher levels of serum  $\gamma$ -glutamyl  
26  
27 transferase in women and heavy alcohol consumption in men might affect the risk of  
28  
29 vertebral fracture.

30 Mostly, results of the stratified analysis were consistent with those of the overall analysis.  
31  
32 However, two breakthroughs should be highlighted: (1) T1DM was associated with a  
33  
34 higher risk for total, hip, and ankle fractures than T2DM. The possible reasons for this  
35  
36 could be the different reasons for the incidence of fracture, such as the BMI in T1DM was  
37  
38 different from that in T2DM, which played a protective role in fractures [52]. Further,  
39  
40 while BMI is a major determinant of BMD and fracture risk, not all studies adjusted for  
41  
42 the impact of BMI, which could have affected the intrinsic correlation of DM and  
43  
44 fractures. (2) Although there was no significant effect on upper arm and ankle fractures  
45  
46 in men with T2DM, these result might be unreliable due to the small number of studies  
47  
48 included. This finding should be verified in future large-scale cohort studies.

49  
50 This meta-analysis has several limitations. The DM ascertainment in individual studies  
51  
52 was not consistent, which may have introduced confounders into the representative DM  
53  
54 cohort. Further, there were inherent recall and selection biases associated with  
55  
56 retrospective cohort studies. In addition, the adjusted models were different across the  
57

1  
2  
3 included studies, and these factors might have played an important role in the  
4 development of fractures. Additionally, substantial heterogeneity could not be explored  
5 fully due to the unavailability of several important factors. Finally, the inherent limitation  
6 in any meta-analysis, including publication bias, and individual data were be available.  
7  
8

9  
10 In conclusion, DM was associated with total, hip, upper arm, and ankle fractures. Further,  
11 T1DM patients were associated with a higher risk of total, hip, and ankle fractures than  
12 were T2DM patients. There was no gender difference in fractures at different sites.  
13 Future studies are warranted to clarify the effect of anti-diabetic therapies and to  
14 investigate effective prevention strategies for fractures at different sites.  
15  
16  
17  
18  
19  
20  
21  
22  
23

#### 24 **Authors' Contributions**

25  
26 Jian-Ling Du and Hao Wang contributed to conception and design; Hao Wang, Ying Ba,  
27 Qian Xing contributed to acquisition, analysis and interpretation of data; Hao Wang and  
28 Jian-Ling Du were involved in drafting or critical revision of the manuscript. All the  
29 authors approved the final version.  
30  
31  
32  
33

34  
35 **Conflict of interests:** All authors declare no conflict of interest.  
36

37  
38 **Funding statement:** This research did not receive any specific grant from funding  
39 agencies in the public, commercial, or not-for-profit sectors.  
40

41  
42 **Data sharing statement:** No additional data available.  
43  
44  
45  
46  
47  
48  
49  
50  
51  
52  
53  
54  
55  
56  
57  
58  
59  
60

## References:

1. Wild S, Roglic G, Green A, Sicree R, King, H. Global prevalence of diabetes: estimates for the year 2000 and projections for 2030. *Diabetes Care* 2004;**27**: 1047-1053.
2. Boyle JP, *et al.* Projection of diabetes burden through 2050: impact of changing demography and disease prevalence in the U.S. *Diabetes Care* 2001; **24**: 1936-1940.
3. Ray KK, *et al.* Effect of intensive control of glucose on cardiovascular outcomes and death in patients with diabetes mellitus: a meta-analysis of randomised controlled trials. *Lancet* 2009; **373**: 1765-72.
4. Peters SA, Huxley RR, Woodward M. Diabetes as a risk factor for stroke in women compared with men: a systematic review and meta-analysis of 64 cohorts, including 775,385 individuals and 12,539 strokes. *Lancet* 2014; **383**: 1973-80.
5. Tsilidis KK, Kasimis JC, Lopez DS, Ntzani EE, Ioannidis JP. Type 2 diabetes and cancer: umbrella review of meta-analyses of observational studies. *BMJ* 2015;**350**: g7607.
6. Narres M, *et al.* The Incidence of End-Stage Renal Disease in the Diabetic (Compared to the Non-Diabetic) Population: A Systematic Review. *PLoS One* 2016; **11**: e0147329.
7. Carnevale V, Romagnoli E, D'Erasmus E. Skeletal involvement in patients with diabetes mellitus. *Diabetes Metab Res Rev* 2004;**20**: 196-204.
8. Raskin P, Stevenson MRM, Barilla DE, Pak CY. The hypercalciuria of diabetes mellitus: its amelioration with insulin. *Clin Endocrinol* 1978;**9**: 329-335.
9. McNair P, *et al.* Bone mineral loss in insulin-treated diabetes mellitus: studies on pathogenesis. *Acta Endocrinol* 1979;**90**: 463-472.
10. Vestergaard P. Discrepancies in bone mineral density and fracture risk in patients with type 1 and type 2 diabetes: a meta-analysis. *Osteoporos Int* 2007; **18**: 427-444.
11. Fan Y, Wei Y, Lang Y, Liu Y. Diabetes mellitus and risk of hip fractures: a meta-analysis. *Osteoporos Int* 2016;**27**: 219-228.
12. Giangregorio LM, *et al.* FRAX Underestimates Fracture Risk in Patients With Diabetes. *J Bone Miner Res* 2012;**27**: 301-8.
13. Fraser LA, *et al.* Clinical risk factors for fracture in diabetes: a matched cohort analysis. *J Clin Densitom* 2011;**14**: 416-21.
14. Moher D, Liberati A, Tetzlaff J, Altman DG; PRISMA Group. Preferred reporting items for systematic reviews and meta-analyses: the PRISMA statement. *PLoS Med* 2009; **6**: e1000097.
15. Wells G, Shea B, O'Connell D. The Newcastle-Ottawa Scale (NOS) for assessing the quality of nonrandomised studies in meta-analyses. Ottawa (ON): Ottawa Hospital Research Institute 2009. Available: [http://www.ohri.ca/programs/clinical\\_epidemiology/oxford.htm](http://www.ohri.ca/programs/clinical_epidemiology/oxford.htm).
16. DerSimonian R, Laird N. Meta-analysis in clinical trials. *Control Clin Trials* 1986;**7**: 177- 88.
17. Ades AE, Lu G, Higgins JP. The interpretation of random-effects metaanalysis in decision models. *Med Decis Making* 2005;**25**: 646-54.
18. Deeks JJ, Higgins JPT, Altman DG. Analyzing data and undertaking meta-analyses.

- 1  
2  
3 In: Higgins J, Green S, eds. Cochrane Handbook for Systematic Reviews of Interventions  
4 5.0.1. Oxford, UK: The Cochrane Collaboration: 2008; chap 9.  
5  
6 19. Higgins JPT, Thompson SG, Deeks JJ, Altman DG. Measuring inconsistency in  
7 meta-analyses. *BMJ* 2003; **327**: 557–60.  
8  
9 20. Tobias, A. Assessing the influence of a single study in meta-analysis. *Stata Tech Bull*  
10 1999; **47**: 15–17.  
11  
12 21. Altman DG, Bland JM. Interaction revisited: the difference between two estimates .  
13 *BMJ* 2003; **326**: 219.  
14  
15 22. Li XH, Yu FF, Zhou YH, He J. Association between alcohol consumption and the risk  
16 of incident type 2 diabetes: a systematic review and dose-response meta-analysis. *Am J*  
17 *Clin Nutr* 2016; **103**: 818-29.  
18  
19 23. Egger M, Davey Smith G, Schneider M, Minder C. Bias in meta-analysis detected by a  
20 simple, graphical test. *BMJ* 1997; **315**: 629–34.  
21  
22 24. Begg CB, Mazumdar M. Operating characteristics of a rank correlation test for  
23 publication bias. *Biometrics* 1994; **50**: 1088–1101.  
24  
25 25. Strotmeyer ES, *et al.* Potential explanatory factors for higher incident hip fracture  
26 risk in older diabetic adults. *Curr Gerontol Geriatr Res* 2011; **2011**: 979270.  
27  
28 26. Jung JK, *et al.* Fracture Incidence and Risk of Osteoporosis in Female Type 2  
29 Diabetic Patients in Korea. *Diabetes Metab J* 2012; **36**: 144-150.  
30  
31 27. Wallander M, Axelsson KF, Nilsson AG, Lundh D, Lorentzon M. Type 2 Diabetes and  
32 Risk of Hip Fractures and Non-Skeletal Fall Injuries in the Elderly: A Study From the  
33 Fractures and Fall Injuries in the Elderly Cohort (FRAILCO). *J Bone Miner Res* 2016; doi:  
34 10.1002/jbmr.3002.  
35  
36 28. Dobnig H, *et al.* Type 2 diabetes mellitus in nursing home patients: effects on bone  
37 turnover, bone mass, and fracture risk. *J Clin Endocrinol Metab* 2016;**91**: 3355-63.  
38  
39 29. Ottenbacher KJ, Ostir GV, Peek MK, Goodwin JS, Markides KS. Diabetes mellitus as  
40 a risk factor for hip fracture in mexican american older adults. *J Gerontol A Biol Sci Med*  
41 *Sci* 2002; **57**: M648-53.  
42  
43 30. Nicodemus KK, Folsom AR, Iowa Women's Health Study. Type 1 and type 2 diabetes  
44 and incident hip fractures in postmenopausal women. *Diabetes Care* 2001; **24**: 1192-7.  
45  
46 31. Hothersall EJ, *et al.* Contemporary risk of hip fracture in type 1 and type 2 diabetes: a  
47 national registry study from Scotland. *J Bone Miner Res* 2014;**29**: 1054-60.  
48  
49 32. Martinez-Laguna D, *et al.* Incident type 2 diabetes and hip fracture risk: a  
50 population-based matched cohort study. *Osteoporos Int* 2015; **26**: 827–833.  
51  
52 33. Weber DR, Haynes K, Leonard MB, Willi SM, Denburg MR. Type 1 Diabetes Is  
53 Associated With an Increased Risk of Fracture Across the LifeSpan: A Population-Based  
54 Cohort Study Using The Health Improvement Network (THIN). *Diabetes Care* 2015; **38**:  
55 1913–1920.  
56  
57 34. Janghorbani M, Feskanich D, Willett WC, Hu F. Prospective study of diabetes and  
58 risk of hip fracture: the Nurses' Health Study. *Diabetes Care* 2006;**29**: 1573-8.  
59  
60 35. Oei L, *et al.* High bone mineral density and fracture risk in type 2 diabetes as skeletal  
61 complications of inadequate glucose control: the Rotterdam Study. *Diabetes Care* 2013;



1  
2  
3 **36:** 1619-28.

4 36. Ahmed LA, Joakimsen RM, Berntsen GK, Fønnebø V, Schirmer H. Diabetes mellitus  
5 and the risk of non-vertebral fractures: the Tromsø study. *Osteoporos Int* 2006;**17**: 495–  
6 500.

7  
8 37. Miao J, Brismar K, Nyrén O, Ugarph-Morawski A, Ye W. Elevated hip fracture risk in  
9 type 1 diabetic patients: a population-based cohort study in Sweden. *Diabetes Care* 2005;  
10 **28**: 2850-5.

11  
12 38. Ivers RQ, Cumming RG, Mitchell P, Peduto AJ; Blue Mountains Eye Study.  
13 Diabetes and risk of fracture: The Blue Mountains Eye Study. *Diabetes Care* 2001; **24**:  
14 1198-203.

15  
16 39. Koh WP, *et al.* Diabetes and risk of hip fracture in the Singapore Chinese Health  
17 Study. *Diabetes Care* 2010;**33**: 1766-70.

18  
19 40. Meyer HE, Tverdal A, Falch JA. Risk factors for hip fracture in middle-aged  
20 Norwegian women and men. *Am J Epidemiol* 1993;**137**: 1203-11.

21  
22 41. Lipscombe LL, Jamal SA, Booth GL, Hawker GA. The risk of hip fractures in older  
23 individuals with diabetes: a population-based study. *Diabetes Care* 2007;**30**: 835-41.

24  
25 42. Melton LJ, Leibson CL, Achenbach SJ, Therneau TM, Khosla S. Fracture risk in type  
26 2 diabetes: update of a population-based study. *J Bone Miner Res* 2008; **23**: 1334-42.

27  
28 43. Forsen L, Meyer HE, Midthjell K, Edna TH. Diabetes mellitus and the incidence of  
29 hip fracture: results from the Nord-Trøndelag Health Survey. *Diabetologia* 1999;**42**:  
30 920-925.

31  
32 44. Holmberg AH, *et al.* Risk factors for fragility fracture in middle age. A prospective  
33 population-based study of 33,000 men and women. *Osteoporos Int* 2006;**17**: 1065–1077.

34  
35 45. Bonds DE, *et al.* Risk of fracture in women with type 2 diabetes: the Women's Health  
36 Initiative Observational Study. *J Clin Endocrinol Metab* 2006;**91**: 3404-10.

37  
38 46. Leslie WD, *et al.* Biphasic fracture risk in diabetes: A population-based study. *Bone*  
39 2007; **40**: 1595-1601.

40  
41 47. Majumdar SR, *et al.* Longer Duration of Diabetes Strongly Impacts Fracture Risk  
42 Assessment: The Manitoba BMD Cohort. *J Clin Endocrinol Metab* 2016;**101**: 4489–  
43 4496.

44  
45 48. Schwartz AV, *et al.* Older Women with Diabetes Have an Increased Risk of Fracture:  
46 A Prospective Study. *J Clin Endocrinol Metab* 2001;**86**: 32-38.

47  
48 49. Chen HF, Ho CA, Li CY. Increased risks of hip fracture in diabetic patients of Taiwan:  
49 a population-based study. *Diabetes Care* 2008;**31**: 75-80.

50  
51 50. Shah VN, Shah CS, Snell-Bergeon JK. Type 1 diabetes and risk of fracture:  
52 meta-analysis and review of the literature. *Diabet Med* 2015;**32**: 1134-42.

53  
54 51. Schwartz AV, *et al.* Pentosidine and increased fracture risk in older adults with type 2  
55 diabetes. *J Clin Endocrinol Metab* 2009;**94**: 2380-6.

56  
57 52. De Laet C, *et al.* Body mass index as a predictor of fracture risk: a meta-analysis.  
58 *Osteoporos Int* 2005; **16**:1330-8.

**Figure legends:**

Fig 1. Study selection process.

Fig 2. Association between DM and the risk of total fractures.

Fig 3. Association between DM and the risk of hip fracture.

Fig 4. Association between DM and the risk of distal forearm fracture.

Fig 5. Association between DM and the risk of upper arm fracture.

Fig 6. Association between DM and the risk of ankle fracture.

Fig 7. Association between DM and the risk of vertebrae fracture.

Fig 8. Publish bias for total fractures.

**Supporting information**

S1 Table. Quality scores of prospective cohort studies using Newcastle-Ottawa Scale.

S2 Table. Sensitivity analysis for total fractures.

S3 Table. Sensitivity analysis for hip fracture.

S4 Table. Sensitivity analysis for distal forearm fracture.

S5 Table. Sensitivity analysis for upper arm fracture.

S6 Table. Sensitivity analysis for ankle fracture.

S7 Table. Sensitivity analysis for vertebrae fracture.

Checklist S1. PRISMA Checklist

1  
2  
3  
4  
5  
6  
7  
8  
9  
10  
11  
12  
13  
14  
15  
16  
17  
18  
19  
20  
21  
22  
23  
24  
25  
26  
27  
28  
29  
30  
31  
32  
33  
34  
35  
36  
37  
38  
39  
40  
41  
42  
43  
44  
45  
46  
47  
48  
49  
50  
51  
52  
53  
54  
55  
56  
57  
58  
59  
60

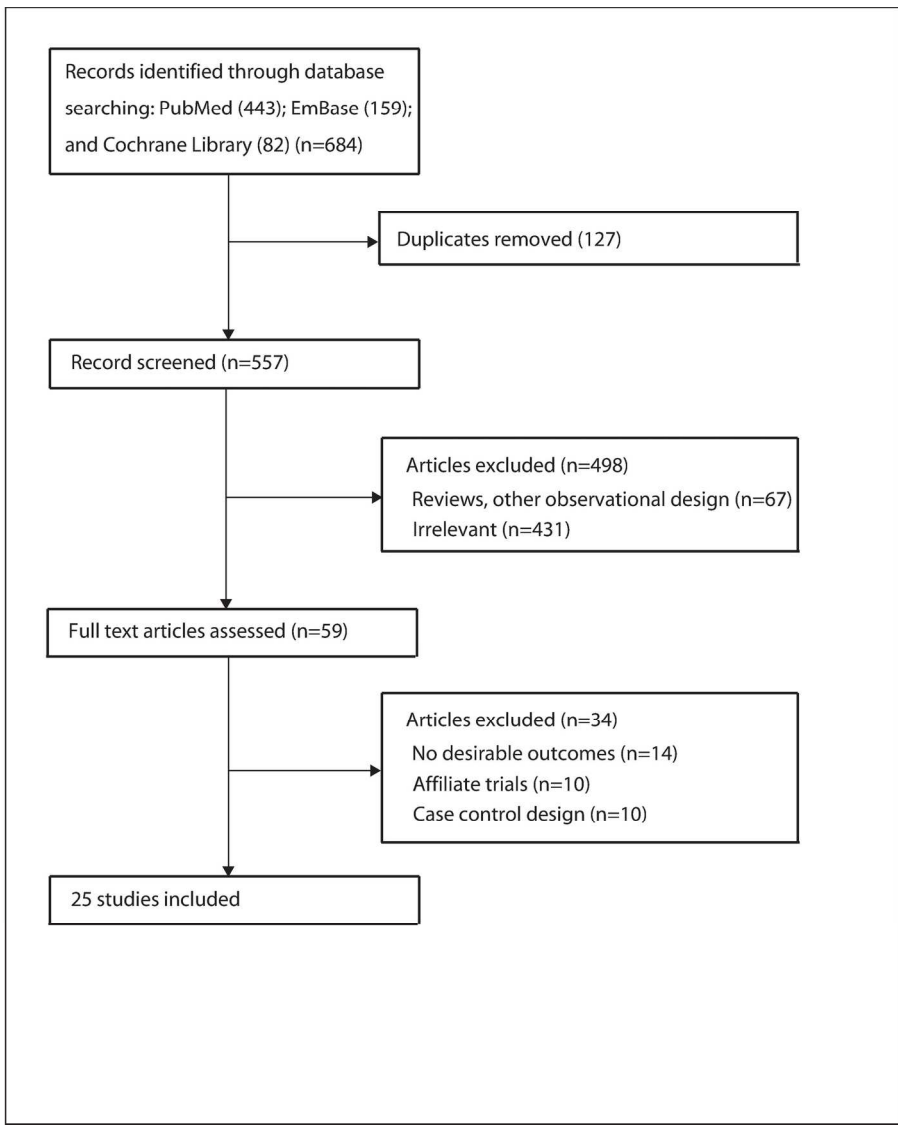

Fig 1. Study selection process.

168x188mm (300 x 300 DPI)

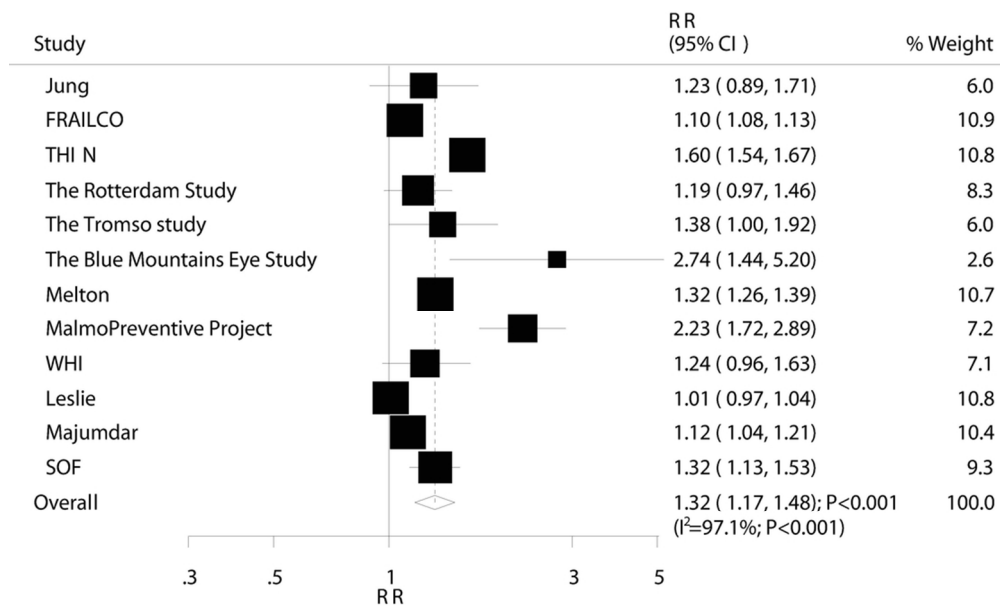

Fig 2. Association between DM and the risk of total fractures.

94x56mm (300 x 300 DPI)

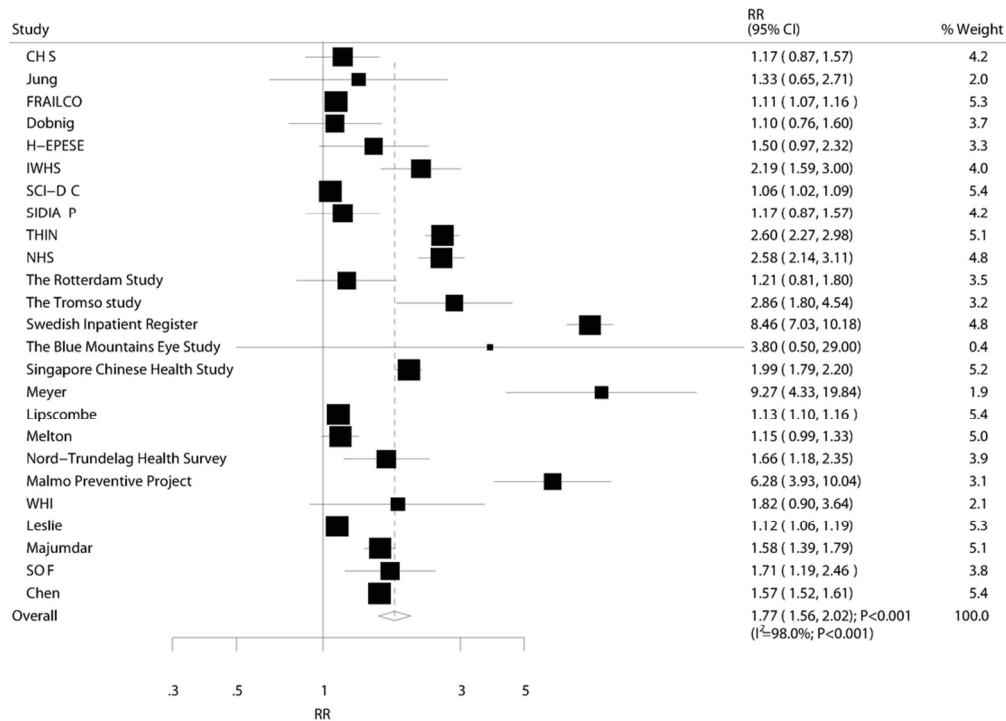

Fig 3. Association between DM and the risk of hip fracture.

93x67mm (300 x 300 DPI)

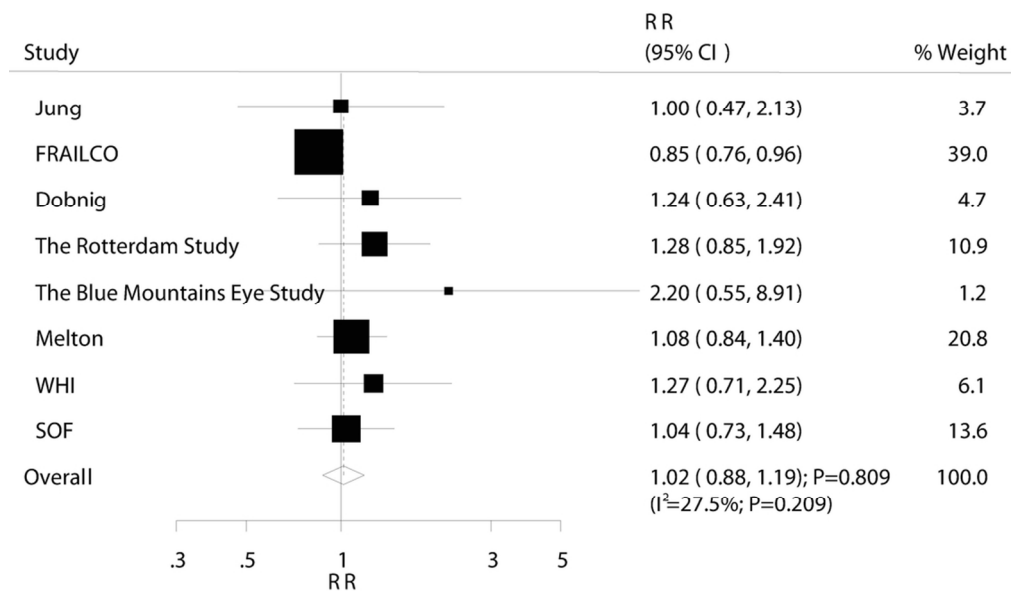

Fig 4. Association between DM and the risk of distal forearm fracture.

93x54mm (300 x 300 DPI)

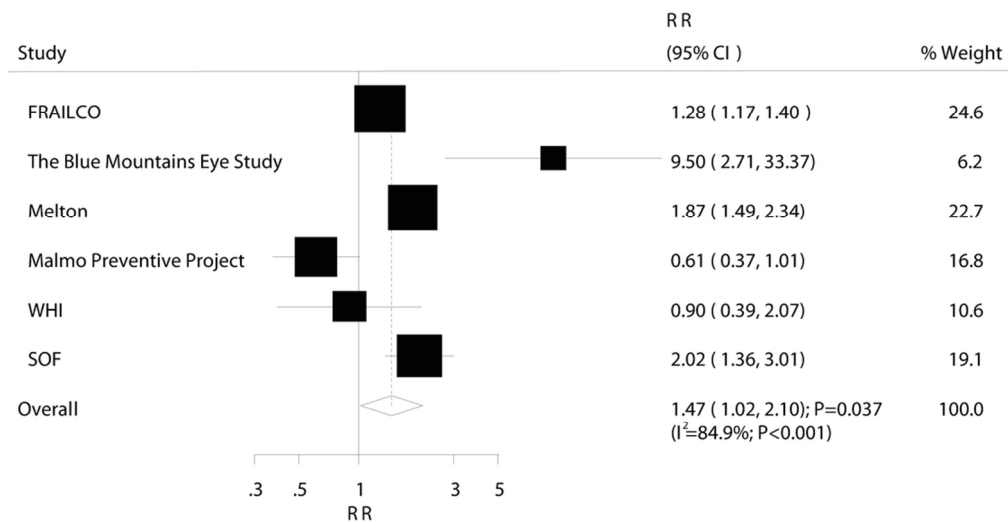

Fig 5. Association between DM and the risk of upper arm fracture.

94x48mm (300 x 300 DPI)

review only

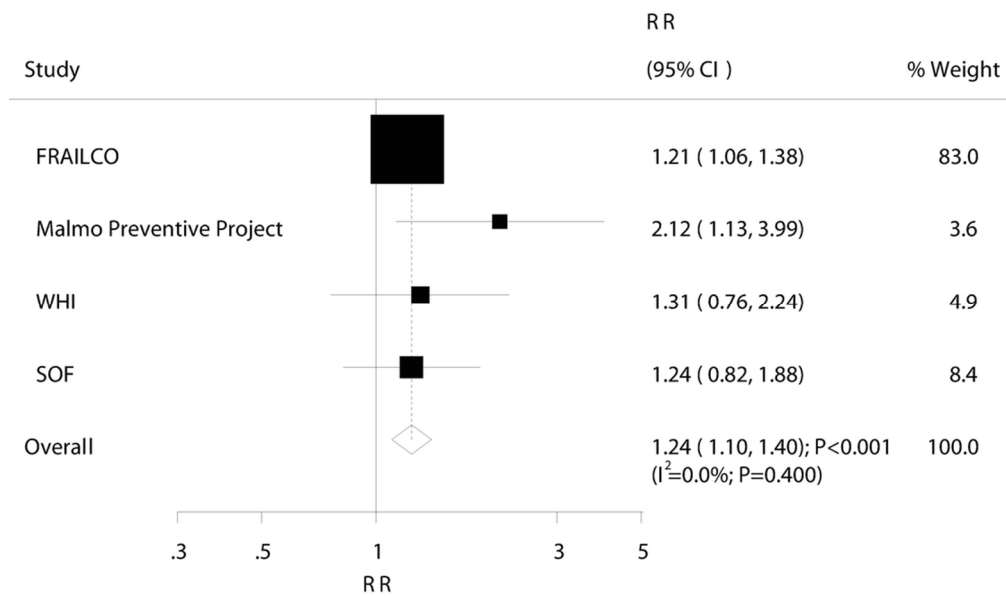

Fig 6. Association between DM and the risk of ankle fracture.

94x55mm (300 x 300 DPI)



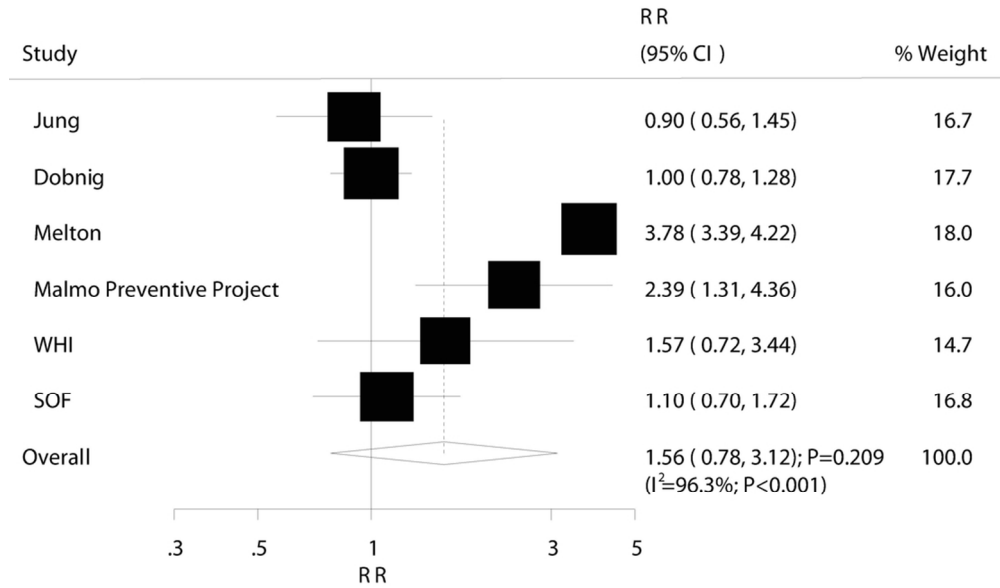

26 Fig 7. Association between DM and the risk of vertebrae fracture.

27 94x54mm (300 x 300 DPI)

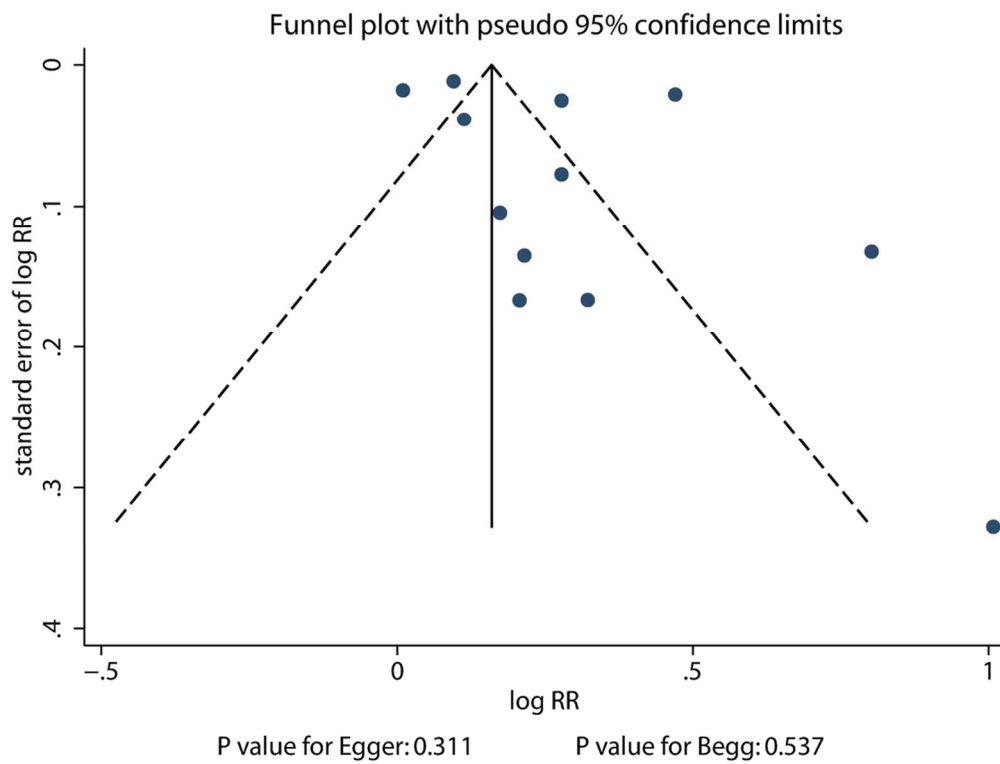

Fig 8. Publish bias for total fractures.

99x74mm (300 x 300 DPI)

1  
2  
3  
4  
5  
6  
7  
8  
9  
10  
11  
12  
13  
14  
15  
16  
17  
18  
19  
20  
21  
22  
23  
24  
25  
26  
27  
28  
29  
30  
31  
32  
33  
34  
35  
36  
37  
38  
39  
40  
41  
42  
43  
44  
45  
46

S1 Table. Quality scores of prospective cohort studies using Newcastle-Ottawa Scale.

| Study                             | Selection                                |                                     |                             |                                                               | Comparability                                        |                       | Outcome                     |                         | NOS           |
|-----------------------------------|------------------------------------------|-------------------------------------|-----------------------------|---------------------------------------------------------------|------------------------------------------------------|-----------------------|-----------------------------|-------------------------|---------------|
|                                   | Representativeness of the exposed cohort | Selection of the non exposed cohort | Ascertainment of DM disease | Demonstration that outcomes was not present at start of study | Comparability on the basis of the design or analysis | Assessment of outcome | Adequate follow-up duration | Adequate follow-up rate | Overall score |
| CHS [25]                          | 0                                        | 1                                   | 1                           | 1                                                             | 2                                                    | 1                     | 1                           | 1                       | 8             |
| Jung [26]                         | 0                                        | 1                                   | 1                           | 1                                                             | 2                                                    | 1                     | 0                           | 1                       | 7             |
| FRAILCO [27]                      | 1                                        | 1                                   | 1                           | 1                                                             | 2                                                    | 1                     | 0                           | 1                       | 8             |
| Dobnig [28]                       | 0                                        | 1                                   | 1                           | 1                                                             | 1                                                    | 1                     | 0                           | 1                       | 6             |
| H-EPESE [29]                      | 0                                        | 1                                   | 1                           | 1                                                             | 2                                                    | 1                     | 0                           | 1                       | 7             |
| IWHS [30]                         | 1                                        | 1                                   | 1                           | 1                                                             | 2                                                    | 1                     | 1                           | 1                       | 9             |
| SCI-DC [31]                       | 1                                        | 1                                   | 1                           | 1                                                             | 2                                                    | 1                     | 0                           | 0                       | 7             |
| SIDIAP [32]                       | 1                                        | 1                                   | 1                           | 1                                                             | 2                                                    | 1                     | 0                           | 1                       | 8             |
| THIN [33]                         | 1                                        | 1                                   | 1                           | 1                                                             | 1                                                    | 1                     | 0                           | 0                       | 6             |
| NHS [34]                          | 1                                        | 1                                   | 1                           | 1                                                             | 2                                                    | 1                     | 1                           | 1                       | 9             |
| The Rotterdam Study [35]          | 0                                        | 1                                   | 1                           | 1                                                             | 2                                                    | 1                     | 1                           | 1                       | 8             |
| The Tromsø study [36]             | 1                                        | 1                                   | 1                           | 1                                                             | 2                                                    | 1                     | 0                           | 1                       | 8             |
| Swedish Inpatient Register [37]   | 0                                        | 1                                   | 1                           | 1                                                             | 1                                                    | 1                     | 1                           | 0                       | 6             |
| The Blue Mountains Eye Study [38] | 0                                        | 1                                   | 1                           | 1                                                             | 2                                                    | 1                     | 0                           | 1                       | 7             |
| Singapore Chinese                 | 1                                        | 1                                   | 1                           | 1                                                             | 2                                                    | 1                     | 1                           | 1                       | 9             |

1  
2  
3  
4

## Health Study [39]

|                                            |   |   |   |   |   |   |   |   |   |
|--------------------------------------------|---|---|---|---|---|---|---|---|---|
| 6 Meyer [40]                               | 1 | 1 | 1 | 1 | 2 | 1 | 1 | 1 | 9 |
| 7 Lipscombe [41]                           | 1 | 1 | 1 | 1 | 1 | 1 | 0 | 1 | 7 |
| 9 Melton [42]                              | 0 | 1 | 1 | 1 | 1 | 1 | 0 | 1 | 6 |
| 10 Nord-Trøndelag<br>11 Health Survey [43] | 1 | 1 | 1 | 1 | 2 | 1 | 1 | 1 | 9 |
| 12 Malmö Preventive<br>14 Project [44]     | 1 | 1 | 1 | 1 | 2 | 1 | 0 | 0 | 7 |
| 15 WHI [45]                                | 1 | 1 | 1 | 1 | 2 | 1 | 0 | 1 | 8 |
| 17 Leslie [46]                             | 1 | 1 | 1 | 1 | 2 | 1 | 1 | 1 | 9 |
| 18 Majumdar [47]                           | 1 | 1 | 1 | 1 | 2 | 1 | 0 | 1 | 8 |
| 19 SOF [48]                                | 1 | 1 | 1 | 1 | 2 | 1 | 1 | 1 | 9 |
| 21 Chen [49]                               | 1 | 1 | 1 | 1 | 2 | 1 | 0 | 1 | 8 |

22  
23  
24  
25  
26  
27  
28  
29  
30  
31  
32  
33  
34  
35  
36  
37  
38  
39  
40  
41  
42  
43  
44  
45  
46

S2 Table. Sensitivity analysis for total fractures

| <b>Excluding study</b>       | <b>RR and 95% CI</b> | <b>P value</b> | <b>Heterogeneity (%)</b> | <b>P value for heterogeneity</b> |
|------------------------------|----------------------|----------------|--------------------------|----------------------------------|
| Jung                         | 1.32 (1.17-1.50)     | <0.001         | 97.4                     | <0.001                           |
| FRAILCO                      | 1.36 (1.17-1.58)     | <0.001         | 96.9                     | <0.001                           |
| THIN                         | 1.25 (1.14-1.36)     | <0.001         | 91.7                     | <0.001                           |
| The Rotterdam Study          | 1.33 (1.17-1.51)     | <0.001         | 97.4                     | <0.001                           |
| The Tromsø study             | 1.31 (1.16-1.46)     | <0.001         | 97.4                     | <0.001                           |
| The Blue Mountains Eye Study | 1.29 (1.14-1.46)     | <0.001         | 97.4                     | <0.001                           |
| Melton                       | 1.32 (1.16-1.51)     | <0.001         | 97.2                     | <0.001                           |
| Malmö Preventive Project     | 1.26 (1.12-1.42)     | <0.001         | 97.2                     | <0.001                           |
| WHI                          | 1.32 (1.17-1.50)     | <0.001         | 97.4                     | <0.001                           |
| Leslie                       | 1.36 (1.19-1.56)     | <0.001         | 96.6                     | <0.001                           |
| Majumdar                     | 1.34 (1.18-1.53)     | <0.001         | 97.4                     | <0.001                           |
| SOF                          | 1.32 (1.16-1.49)     | <0.001         | 97.4                     | <0.001                           |

S3 Table. Sensitivity analysis for hip fracture

| Excluding study                | RR and 95% CI    | P value | Heterogeneity (%) | P value for heterogeneity |
|--------------------------------|------------------|---------|-------------------|---------------------------|
| CHS                            | 1.81 (1.58-2.06) | <0.001  | 98.1              | <0.001                    |
| Jung                           | 1.78 (1.57-2.03) | <0.001  | 98.1              | <0.001                    |
| FRAILCO                        | 1.83 (1.59-2.10) | <0.001  | 98.0              | <0.001                    |
| Dobnig                         | 1.81 (1.58-2.06) | <0.001  | 98.1              | <0.001                    |
| H-EPESE                        | 1.78 (1.56-2.03) | <0.001  | 98.1              | <0.001                    |
| IWHS                           | 1.76 (1.54-2.00) | <0.001  | 98.1              | <0.001                    |
| SCI-DC                         | 1.83 (1.59-2.11) | <0.001  | 97.9              | <0.001                    |
| SIDIAP                         | 1.81 (1.58-2.06) | <0.001  | 98.1              | <0.001                    |
| THIN                           | 1.73 (1.52-1.97) | <0.001  | 97.9              | <0.001                    |
| NHS                            | 1.74 (1.53-1.98) | <0.001  | 98.0              | <0.001                    |
| The Rotterdam Study            | 1.80 (1.58-2.05) | <0.001  | 98.1              | <0.001                    |
| The Tromsø study               | 1.75 (1.53-1.99) | <0.001  | 98.1              | <0.001                    |
| Swedish Inpatient Register     | 1.61 (1.44-1.80) | <0.001  | 97.1              | <0.001                    |
| The Blue Mountains Eye Study   | 1.77 (1.55-2.01) | <0.001  | 98.1              | <0.001                    |
| Singapore Chinese Health Study | 1.76 (1.54-2.00) | <0.001  | 98.0              | <0.001                    |
| Meyer                          | 1.72 (1.51-1.95) | <0.001  | 98.1              | <0.001                    |
| Lipscombe                      | 1.83 (1.58-2.13) | <0.001  | 97.9              | <0.001                    |
| Melton                         | 1.81 (1.59-2.07) | <0.001  | 98.1              | <0.001                    |
| Nord-Trøndelag Health Survey   | 1.78 (1.56-2.03) | <0.001  | 98.1              | <0.001                    |
| Malmö Preventive Project       | 1.70 (1.50-1.93) | <0.001  | 98.0              | <0.001                    |
| WHI                            | 1.77 (1.56-2.02) | <0.001  | 98.1              | <0.001                    |
| Leslie                         | 1.82 (1.59-2.09) | <0.001  | 98.1              | <0.001                    |
| Majumdar                       | 1.78 (1.56-2.04) | <0.001  | 98.1              | <0.001                    |
| SOF                            | 1.78 (1.56-2.02) | <0.001  | 98.1              | <0.001                    |
| Chen                           | 1.79 (1.56-2.05) | <0.001  | 97.5              | <0.001                    |

S4 Table. Sensitivity analysis for distal forearm fracture.

| Excluding study              | RR and 95% CI    | P value | Heterogeneity (%) | P value for heterogeneity |
|------------------------------|------------------|---------|-------------------|---------------------------|
| Jung                         | 1.04 (0.87-1.23) | 0.687   | 37.7              | 0.141                     |
| FRAILCO                      | 1.13 (0.96-1.34) | 0.139   | 0.0               | 0.928                     |
| Dobnig                       | 1.02 (0.86-1.19) | 0.849   | 33.1              | 0.176                     |
| The Rotterdam Study          | 0.97 (0.84-1.12) | 0.671   | 17.3              | 0.298                     |
| The Blue Mountains Eye Study | 1.00 (0.87-1.16) | 0.965   | 26.8              | 0.224                     |
| Melton                       | 1.02 (0.85-1.22) | 0.846   | 27.3              | 0.220                     |
| WHI                          | 1.01 (0.86-1.18) | 0.942   | 29.8              | 0.201                     |
| SOF                          | 1.04 (0.86-1.24) | 0.700   | 35.4              | 0.158                     |

For peer review only

S5 Table. Sensitivity analysis for upper arm fracture

| <b>Excluding study</b>       | <b>RR and 95% CI</b> | <b>P value</b> | <b>Heterogeneity (%)</b> | <b>P value for heterogeneity</b> |
|------------------------------|----------------------|----------------|--------------------------|----------------------------------|
| FRAILCO                      | 1.59 (0.89-2.83)     | 0.116          | 85.1                     | <0.001                           |
| The Blue Mountains Eye Study | 1.31 (0.95-1.82)     | 0.100          | 83.2                     | <0.001                           |
| Melton                       | 1.40 (0.86-2.30)     | 0.178          | 83.3                     | <0.001                           |
| Malmö Preventive Project     | 1.73 (1.21-2.46)     | 0.003          | 82.8                     | <0.001                           |
| WHI                          | 1.56 (1.06-2.29)     | 0.025          | 87.6                     | <0.001                           |
| SOF                          | 1.36 (0.90-2.06)     | 0.142          | 86.2                     | <0.001                           |

For peer review only



S6 Table. Sensitivity analysis for ankle fracture

| <b>Excluding study</b>   | <b>RR and 95% CI</b> | <b>P value</b> | <b>Heterogeneity (%)</b> | <b>P value for heterogeneity</b> |
|--------------------------|----------------------|----------------|--------------------------|----------------------------------|
| FRAILCO                  | 1.42 (1.05-1.90)     | 0.021          | 2.2                      | 0.360                            |
| Malmö Preventive Project | 1.22 (1.08-1.38)     | 0.002          | 0.0                      | 0.958                            |
| WHI                      | 1.30 (1.03-1.63)     | 0.026          | 31.2                     | 0.234                            |
| SOF                      | 1.33 (1.02-1.73)     | 0.034          | 32.2                     | 0.229                            |

For peer review only

S7 Table. Sensitivity analysis for vertebrae fracture

| <b>Excluding study</b>   | <b>RR and 95% CI</b> | <b>P value</b> | <b>Heterogeneity (%)</b> | <b>P value for heterogeneity</b> |
|--------------------------|----------------------|----------------|--------------------------|----------------------------------|
| Jung                     | 1.74 (0.82-3.69)     | 0.148          | 96.5                     | <0.001                           |
| Dobnig                   | 1.72 (0.84-3.52)     | 0.140          | 93.5                     | <0.001                           |
| Melton                   | 1.20 (0.89-1.63)     | 0.233          | 52.6                     | 0.077                            |
| Malmö Preventive Project | 1.44 (0.65-3.17)     | 0.370          | 97.1                     | <0.001                           |
| WHI                      | 1.56 (0.72-3.35)     | 0.258          | 97.0                     | <0.001                           |
| SOF                      | 1.67 (0.77-3.63)     | 0.194          | 96.6                     | <0.001                           |

For peer review only

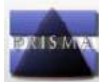

# PRISMA 2009 Checklist

1  
2  
3  
4  
5  
6  
7  
8  
9  
10  
11  
12  
13  
14  
15  
16  
17  
18  
19  
20  
21  
22  
23  
24  
25  
26  
27  
28  
29  
30  
31  
32  
33  
34  
35  
36  
37  
38  
39  
40  
41  
42  
43  
44  
45  
46  
47

| Section/topic                      | #  | Checklist item                                                                                                                                                                                                                                                                                              | Reported on page # |
|------------------------------------|----|-------------------------------------------------------------------------------------------------------------------------------------------------------------------------------------------------------------------------------------------------------------------------------------------------------------|--------------------|
| <b>TITLE</b>                       |    |                                                                                                                                                                                                                                                                                                             |                    |
| Title                              | 1  | Identify the report as a systematic review, meta-analysis, or both.                                                                                                                                                                                                                                         | 1                  |
| <b>ABSTRACT</b>                    |    |                                                                                                                                                                                                                                                                                                             |                    |
| Structured summary                 | 2  | Provide a structured summary including, as applicable: background; objectives; data sources; study eligibility criteria, participants, and interventions; study appraisal and synthesis methods; results; limitations; conclusions and implications of key findings; systematic review registration number. | 2                  |
| <b>INTRODUCTION</b>                |    |                                                                                                                                                                                                                                                                                                             |                    |
| Rationale                          | 3  | Describe the rationale for the review in the context of what is already known.                                                                                                                                                                                                                              | 4                  |
| Objectives                         | 4  | Provide an explicit statement of questions being addressed with reference to participants, interventions, comparisons, outcomes, and study design (PICOS).                                                                                                                                                  | 4-5                |
| <b>METHODS</b>                     |    |                                                                                                                                                                                                                                                                                                             |                    |
| Protocol and registration          | 5  | Indicate if a review protocol exists, if and where it can be accessed (e.g., Web address), and, if available, provide registration information including registration number.                                                                                                                               | None               |
| Eligibility criteria               | 6  | Specify study characteristics (e.g., PICOS, length of follow-up) and report characteristics (e.g., years considered, language, publication status) used as criteria for eligibility, giving rationale.                                                                                                      | 5                  |
| Information sources                | 7  | Describe all information sources (e.g., databases with dates of coverage, contact with study authors to identify additional studies) in the search and date last searched.                                                                                                                                  | 5                  |
| Search                             | 8  | Present full electronic search strategy for at least one database, including any limits used, such that it could be repeated.                                                                                                                                                                               | 5                  |
| Study selection                    | 9  | State the process for selecting studies (i.e., screening, eligibility, included in systematic review, and, if applicable, included in the meta-analysis).                                                                                                                                                   | 5                  |
| Data collection process            | 10 | Describe method of data extraction from reports (e.g., piloted forms, independently, in duplicate) and any processes for obtaining and confirming data from investigators.                                                                                                                                  | 5-6                |
| Data items                         | 11 | List and define all variables for which data were sought (e.g., PICOS, funding sources) and any assumptions and simplifications made.                                                                                                                                                                       | 6                  |
| Risk of bias in individual studies | 12 | Describe methods used for assessing risk of bias of individual studies (including specification of whether this was done at the study or outcome level), and how this information is to be used in any data synthesis.                                                                                      | 6                  |
| Summary measures                   | 13 | State the principal summary measures (e.g., risk ratio, difference in means).                                                                                                                                                                                                                               | 6                  |
| Synthesis of results               | 14 | Describe the methods of handling data and combining results of studies, if done, including measures of consistency (e.g., I <sup>2</sup> ) for each meta-analysis.                                                                                                                                          | 6                  |

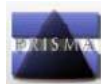

# PRISMA 2009 Checklist

| Section/topic                 | #  | Checklist item                                                                                                                                                                                           | Reported on page # |
|-------------------------------|----|----------------------------------------------------------------------------------------------------------------------------------------------------------------------------------------------------------|--------------------|
| Risk of bias across studies   | 15 | Specify any assessment of risk of bias that may affect the cumulative evidence (e.g., publication bias, selective reporting within studies).                                                             | 6                  |
| Additional analyses           | 16 | Describe methods of additional analyses (e.g., sensitivity or subgroup analyses, meta-regression), if done, indicating which were pre-specified.                                                         | 6                  |
| <b>RESULTS</b>                |    |                                                                                                                                                                                                          |                    |
| Study selection               | 17 | Give numbers of studies screened, assessed for eligibility, and included in the review, with reasons for exclusions at each stage, ideally with a flow diagram.                                          | 7                  |
| Study characteristics         | 18 | For each study, present characteristics for which data were extracted (e.g., study size, PICOS, follow-up period) and provide the citations.                                                             | 12                 |
| Risk of bias within studies   | 19 | Present data on risk of bias of each study and, if available, any outcome level assessment (see item 12).                                                                                                | 12                 |
| Results of individual studies | 20 | For all outcomes considered (benefits or harms), present, for each study: (a) simple summary data for each intervention group (b) effect estimates and confidence intervals, ideally with a forest plot. | 12-18              |
| Synthesis of results          | 21 | Present results of each meta-analysis done, including confidence intervals and measures of consistency.                                                                                                  | 12-18              |
| Risk of bias across studies   | 22 | Present results of any assessment of risk of bias across studies (see Item 15).                                                                                                                          | 12-18              |
| Additional analysis           | 23 | Give results of additional analyses, if done (e.g., sensitivity or subgroup analyses, meta-regression [see Item 16]).                                                                                    | 12-18              |
| <b>DISCUSSION</b>             |    |                                                                                                                                                                                                          |                    |
| Summary of evidence           | 24 | Summarize the main findings including the strength of evidence for each main outcome; consider their relevance to key groups (e.g., healthcare providers, users, and policy makers).                     | 18-20              |
| Limitations                   | 25 | Discuss limitations at study and outcome level (e.g., risk of bias), and at review-level (e.g., incomplete retrieval of identified research, reporting bias).                                            | 20                 |
| Conclusions                   | 26 | Provide a general interpretation of the results in the context of other evidence, and implications for future research.                                                                                  | 20                 |
| <b>FUNDING</b>                |    |                                                                                                                                                                                                          |                    |
| Funding                       | 27 | Describe sources of funding for the systematic review and other support (e.g., supply of data); role of funders for the systematic review.                                                               | 21                 |

From: Moher D, Liberati A, Tetzlaff J, Altman DG, The PRISMA Group (2009). Preferred Reporting Items for Systematic Reviews and Meta-Analyses: The PRISMA Statement. PLoS Med 6(6): e1000097. doi:10.1371/journal.pmed1000097

For more information, visit: [www.prisma-statement.org](http://www.prisma-statement.org).

# BMJ Open

## Diabetes mellitus and the risk of fractures at specific sites: a meta-analysis

|                                 |                                                                                                                                                                                                                                                                                                                                                                                                                         |
|---------------------------------|-------------------------------------------------------------------------------------------------------------------------------------------------------------------------------------------------------------------------------------------------------------------------------------------------------------------------------------------------------------------------------------------------------------------------|
| Journal:                        | <i>BMJ Open</i>                                                                                                                                                                                                                                                                                                                                                                                                         |
| Manuscript ID                   | bmjopen-2018-024067.R1                                                                                                                                                                                                                                                                                                                                                                                                  |
| Article Type:                   | Research                                                                                                                                                                                                                                                                                                                                                                                                                |
| Date Submitted by the Author:   | 12-Jul-2018                                                                                                                                                                                                                                                                                                                                                                                                             |
| Complete List of Authors:       | wang, hao; the first affiliated hospital of Dalian Medical University, Department of endocrinology<br>Ba, Ying; the first affiliated hospital of Dalian Medical University, Department of endocrinology<br>Xing, Qian; the first affiliated hospital of Dalian Medical University, Department of endocrinology<br>Du, Jianling; the first affiliated hospital of Dalian Medical University, Department of endocrinology |
| <b>Primary Subject Heading</b>: | Diabetes and endocrinology                                                                                                                                                                                                                                                                                                                                                                                              |
| Secondary Subject Heading:      | Diabetes and endocrinology, Public health                                                                                                                                                                                                                                                                                                                                                                               |
| Keywords:                       | diabetes mellitus, fracture, meta-analysis                                                                                                                                                                                                                                                                                                                                                                              |
|                                 |                                                                                                                                                                                                                                                                                                                                                                                                                         |

SCHOLARONE™  
Manuscripts

---

1  
2  
3  
4 **Diabetes mellitus and the risk of fractures at specific sites: a**  
5  
6 **meta-analysis**  
7

8 Hao Wang<sup>1\*</sup>, Ying Ba<sup>1</sup>, Qian Xing<sup>1</sup>, Jian-Ling Du<sup>1</sup>  
9

10 <sup>1</sup>Department of endocrinology, the first affiliated hospital of Dalian Medical  
11 University, Dalian, Liaoning province, China, 116000  
12  
13

14 Hao Wang and Jian-Ling Du contributed equally to this paper.  
15  
16

17  
18 \*Corresponding author: Hao Wang, Department of endocrinology, the first affiliated  
19 hospital of Dalian Medical University, Dalian, Liaoning province, China, 116000.  
20  
21

22 E-mail: [wanghaodl@126.com](mailto:wanghaodl@126.com)  
23  
24  
25

26 **Running title:** DM and fractures  
27

28 **Email:**

29 Hao Wang: [wanghaodl@126.com](mailto:wanghaodl@126.com);  
30

31 Ying Ba: [baying126@126.com](mailto:baying126@126.com);  
32

33 Qian Xing: [xingqiandl@163.com](mailto:xingqiandl@163.com);  
34

35 Jian-Ling Du: [dujianling63@163.com](mailto:dujianling63@163.com)  
36  
37  
38  
39  
40  
41  
42

43 **Word count:** 3026  
44  
45  
46  
47  
48  
49  
50  
51  
52  
53  
54  
55  
56  
57  
58  
59  
60

---

## Abstract

**Objective:** Diabetes mellitus (DM) is associated with an increased fracture risk; however, the impact of DM and subsequent fracture at different sites and the associations according to patient characteristics remain unknown.

**Design:** Meta-analysis

**Data Sources:** The PubMed, EMBASE, and Cochrane Library databases were searched from inception to March 2018.

**Eligibility Criteria:** We included prospective and retrospective cohort studies on the associations of DM and subsequent fracture risk at different sites.

**Data extraction and synthesis:** Two authors independently extracted data and assessed the study quality. Relative risks (RRs) with 95% confidence intervals (CIs) were calculated using a random-effects model, and the heterogeneity across the included studies was evaluated using  $I^2$  and Q statistics.

**Results:** Overall, DM was associated with an increased risk of total (RR: 1.32; 95% CI: 1.17–1.48;  $P<0.001$ ), hip (RR: 1.77; 95% CI: 1.56–2.02;  $P<0.001$ ), upper arm (RR: 1.47; 95% CI: 1.02–2.10;  $P=0.037$ ), and ankle fractures (RR: 1.24; 95% CI: 1.10–1.40;  $P<0.001$ ), whereas DM had no significant impact on the incidence of distal forearm (RR: 1.02; 95% CI: 0.88–1.19;  $P=0.809$ ) and vertebral fractures (RR: 1.56; 95% CI: 0.78–3.12;  $P=0.209$ ). RR ratios suggested that compared with type 2 DM (T2DM) patients, type 1 DM (T1DM) patients had greater risk of total (RR ratio: 1.24; 95% CI: 1.08–1.41;  $P=0.002$ ), hip (RR ratio: 3.43; 95% CI: 2.27–5.17;  $P<0.001$ ), and

---

1  
2  
3 ankle fractures (RR ratio: 1.71; 95% CI: 1.06–2.78; P=0.029). Although no other  
4  
5  
6 significant differences were observed between subgroups, the association of DM with  
7  
8 upper arm or ankle, vertebrae, and total fracture differed according to sex, study  
9  
10 design, and country, respectively.  
11  
12

13  
14 **Conclusions:** DM patients had greater risks of total, hip, upper arm, and ankle  
15  
16 fractures, with T1DM having a more harmful effect than T2DM.  
17  
18

19  
20  
21  
22 **Keywords:** diabetes mellitus; fracture; meta-analysis  
23  
24  
25  
26  
27  
28

### 29 **Article Summary:**

30  
31  
32 Strengths and limitations of this study:  
33

34  
35 (1) The current study was based on cohort studies, which could eliminate various  
36  
37 confounding factors.  
38

39  
40 (2) A large sample size of patients was included; thus, our findings are potentially  
41  
42 more robust than those of any individual study.  
43

44  
45 (3) DM diagnosis in individual studies was not consistent, which may have  
46  
47 introduced confounders in the representative DM cohort.  
48

49  
50 (4) The adjusted models differed across the included studies, and these factors might  
51  
52 have played an important role in the development of fractures.  
53  
54



---

## INTRODUCTION

Diabetes mellitus (DM) is considered a major global public health problem and is likely to be among the five leading causes of disease burden, with an estimated global prevalence of 4.4% by 2030[1]. Age is an important factor, with the majority of DM patients aged >65 years[2]. Previous studies have confirmed the harmful impact of DM on the risk of vascular outcomes[3,4], cancer at different sites[5], and renal dysfunction[6]. Due to DM, patients might have altered calcium metabolism[7], increased bone turnover[8], and reduced bone mineral density (BMD)[9], which in turn may influence the risk of fractures in DM patients. However, previous meta-analyses reported different strengths of association between DM and the risk of fractures in type 1 and type 2 DM (T1DM and T2DM, respectively)[10,11], which highlights the need to verify and evaluate the association between DM and fracture at other sites.

Previous studies have illustrated the association between clinical factors and the risk of fractures at different sites; in turn, clinicians and patients could benefit from assessing fracture risk[12,13]. However, due to limited sample sizes, the associations in patients with specific characteristics were not determined, and thus, there is a need for further verification. It is of critical importance that clinicians are able to identify DM patients and the risk of fracture at different sites in patients with specific characteristics to implement preventive strategies in each such subset. Vestergaard conducted a meta-analysis based on 16 observational studies and found that both

---

1  
2  
3  
4 T1DM and T2DM were associated with an increased risk of hip fracture and that  
5  
6 BMD was increased in T2DM but decreased in T1DM. However, fracture at other  
7  
8 sites and differences according to country, sex, and study design were not separately  
9  
10 assessed[10]. Fan et al. indicated that DM patients had a greater risk of hip fractures  
11  
12 compared with non-DM individuals and that this association was more pronounced in  
13  
14 T1DM patients[11]. However, the stratified results of individual studies should be  
15  
16 first pooled using fixed-effect models, and the summary results of the included studies  
17  
18 should be calculated using random-effects models. Furthermore, the associations  
19  
20 between DM and the risk of fracture at other sites, including total, distal forearm,  
21  
22 upper arm, ankle, and vertebra, were not assessed. Therefore, this study was  
23  
24 conducted to determine whether the association between DM and fracture at different  
25  
26 sites differed according to patient characteristics.  
27  
28  
29  
30  
31  
32  
33  
34  
35  
36

## 37 **MATERIAL AND METHODS**

### 38 **Search strategy and inclusion criteria**

39  
40  
41 This meta-analysis was performed according to the Preferred Reporting Items for  
42  
43 Systematic Reviews and Meta-Analysis statement (Checklist S1)[14]. The PubMed,  
44  
45 EMBASE, and Cochrane Library databases were searched for studies from their  
46  
47 inception to March 2018 using the following core search terms: (“diabetes” OR  
48  
49 “diabetes mellitus” OR “glycuresis”) AND (“fractures, spontaneous” OR “hip  
50  
51 fractures” OR “osteoporotic fractures” OR “fractures, compression” OR “spinal  
52  
53  
54  
55  
56  
57

fractures” OR “fracture”) AND ("epidemiologic study" OR "cohort"). The details of the search strategy for PubMed are shown in Supplemental 1. We restricted the search to include only studies published in English. Furthermore, manual searches of reference lists of relevant studies were performed to identify additional eligible studies. The study topic, design, exposure, and fractures at different sites were used to identify relevant studies.

The literature search and study selection process were independently conducted by two authors using a standardized approach. Any inconsistency was resolved by group discussion until a consensus was reached. The study inclusion criteria are as follows: (1) a prospective or retrospective cohort design; (2) participants with T1DM or T2DM; and (3) report of the effect estimates for comparisons of DM and non-DM and the risk of fracture at different sites. We excluded case-control studies due to various confounding factors that could bias the results.

### **Data collection and quality assessment**

Data extraction and quality assessment were conducted independently by two authors. The information was examined and adjudicated independently by an additional author by referring to the original studies. The abstracted data included the first author or study group’s name, publication year, country, study design, sample size, mean patient age, percentage of men, number of DM patients, percentage of current smokers, mean body mass index (BMI), follow-up duration, DM diagnosis, and

---

adjusted factors. The outcome variable was abstracted using the effect estimate with corresponding 95% confidence intervals (CIs). If the study reported several multivariable adjusted effect estimates, the effect estimate was maximally adjusted to account for potential confounders. The Newcastle-Ottawa Scale (NOS) was used to evaluate the methodological quality, which has been validated by evaluating the quality of observational studies in meta-analyses[15]. The NOS was based on selection (four items with a total of four stars), comparability (one item with a total of two stars), and outcome (three items with a total of three stars) with a total of nine stars for assessment.

### **Statistical Analysis**

The association between DM and the subsequent risk of fractures at different sites was based on effect estimates and corresponding 95% CIs in each study. We first used the fixed-effect model to calculate the summary relative risk (RR) and 95% CI for the association between DM and fractures in individual studies[16]. We then combined the RRs of fracture risk in DM versus non-DM individuals using a random-effects model[17]. Heterogeneity among the included studies was assessed using  $I^2$  and Q statistics, and P values  $<0.10$  were considered to indicate significant heterogeneity[18,19]. Sensitivity analyses were conducted by removing each individual study from the overall analysis[20]. Stratified analyses were conducted for total, hip, distal forearm, upper arm, ankle, and vertebral fractures based on country,

1  
2  
3  
4 DM type, sex, and study design. The RR ratio and its 95% CI was estimated using  
5  
6 specific RR and 95% CI according to country, DM types, sex, and study  
7  
8 design[21,22]. Funnel plot, Egger[23], and Begg[24] tests were used to evaluate  
9  
10 publication bias for total fractures. P-values were 2-sided, and those <0.05 were  
11  
12 considered statistically significant across the included studies. The statistical analyses  
13  
14 were conducted using STATA (version 12.0; Stata Corporation, College Station, TX,  
15  
16 USA).

### 24 **Patient and public involvement**

25  
26  
27 No patients were involved in the development of the research question, outcome  
28  
29 measures, design, study implementation, dissemination of the results of the research  
30  
31 to the study participants, or interpretation of the results.

## 37 **RESULTS**

### 40 **Search of published literature**

41  
42 A total of 684 articles were identified from our electronic search, of which 602 were  
43  
44 excluded due to duplication, irrelevance, and other design issues. We retrieved the full  
45  
46 text for the remaining 59 studies and selected 25 cohort studies for the final analysis  
47  
48 after detailed evaluations[25-49]. The manual search of the reference lists of relevant  
49  
50 reviews did not yield any new eligible studies. The results of the study selection  
51  
52  
53  
54  
55  
56  
57  
58  
59  
60

process are shown in Fig 1, and the general characteristics of the included studies are presented in Table 1 and S1 Table.

Table 1. Baseline characteristic of studies included

| Study                               | Publication year | Country     | Study design | Sample size | Mean age (yr) | Per men (%) | Number of DM | Follow-up (yr)                  |
|-------------------------------------|------------------|-------------|--------------|-------------|---------------|-------------|--------------|---------------------------------|
| CHS [25]                            | 2011             | US          | Pro          | 5641        | 72.8          | 42.0        | 1456         | 10.9                            |
| Jung [26]                           | 2012             | Korea       | Retro        | 2282        | 61.0          | 0.0         | 1268         | 7.0                             |
| FRAILCO [27]                        | 2016             | Sweden      | Pro          | 428305      | 80.8          | 42.4        | 84702        | 1.3                             |
| Dobnig [28]                         | 2006             | Australia   | Pro          | 1664        | >70.0         | 0.0         | 583          | 2.0                             |
| H-EPESE [29]                        | 2002             | US          | Pro          | 2884        | 71.8          | 42.1        | 690          | 7.0                             |
| IWHS [30]                           | 2001             | US          | Pro          | 32089       | 61.6          | 0.0         | 1729         | 9.6                             |
| SCI-DC [31]                         | 2014             | UK          | Retro        | 3801874     | 20.0-84.0     | NA          | 201874       | NA                              |
| SIDIAP [32]                         | 2015             | Spain       | Pro          | 171931      | 62.6          | 56.5        | 58483        | 2.6                             |
| THIN [33]                           | 2015             | UK          | Retro        | 334266      | 34.0          | 56.1        | 30394        | 5.7                             |
| NHS [34]                            | 2006             | US          | Pro          | 109983      | 56.3          | 0.0         | 8640         | 20.0                            |
| The Rotterdam Study [35]            | 2013             | Netherlands | Pro          | 4135        | 68.4          | 40.6        | 420          | 12.2                            |
| The Tromsø study [36]               | 2006             | Norway      | Pro          | 27159       | 47.0          | 47.7        | 455          | 6.0                             |
| Swedish Inpatient Register [37]     | 2005             | Sweden      | Retro        | 24605       | 20.7          | 51.0        | 24605        | 9.9                             |
| The Blue Mountains Eye Study [38]   | 2001             | Australia   | Pro          | 3654        | 66.2          | 43.3        | 216          | 5.0                             |
| Singapore Chinese Health Study [39] | 2010             | Singapore   | Pro          | 63257       | 56.4          | 44.3        | 5668         | 12.0                            |
| Meyer [40]                          | 1993             | Norway      | Pro          | 52313       | 35.0-49.0     | 51.6        | 288          | 10.9                            |
| Lipscombe [41]                      | 2007             | Canada      | Retro        | 598812      | >66.0         | 50.6        | 197412       | 6.1                             |
| Melton [42]                         | 2008             | US          | Retro        | 1964        | 61.7          | 51.0        | 1964         | 11.8                            |
| Nord-Trøndelag Health Survey [43]   | 1999             | Norway      | Pro          | 35444       | 50.0-74.0     | 47.5        | 1850         | 9.0                             |
| Malmö Preventive Project [44]       | 2006             | Sweden      | Pro          | 33346       | 27.0-61.0     | 67.3        | 166          | 16.0 for men and 11.0 for women |
| WHI [45]                            | 2006             | US          | Pro          | 93676       | 63.4          | 0.0         | 5285         | 7.0                             |
| Leslie [46]                         | 2007             | Canada      | Retro        | 318776      | 58.0          | 50.0        | 82094        | 10.0                            |
| Majumdar [47]                       | 2016             | Canada      | Retro        | 57938       | 64.3          | 0.0         | 8840         | 7.2                             |
| SOF [48]                            | 2001             | US          | Pro          | 9754        | 71.0          | 0.0         | 657          | 9.4                             |

---

|           |      |       |       |        |      |      |        |     |
|-----------|------|-------|-------|--------|------|------|--------|-----|
| Chen [49] | 2008 | China | Retro | 969820 | 60.0 | 47.0 | 484787 | 6.0 |
|-----------|------|-------|-------|--------|------|------|--------|-----|

---

\*Yr: year; Per: percentage; Pro: prospective; Retro: retrospective

### Study characteristics

Of the 25 included studies, 16 had a prospective cohort design[25,27-30,32,34-36,38-40,43-45,48] and the remaining nine studies had a retrospective cohort design[26,31,33,37,41,42,46,47]. The sample sizes ranged from 1,664 to 3,801,874, while the number of DM patients ranged from 166 to 484,787. Twelve studies were conducted in the US, Australia, or Canada[25,28-30,34,38,41,42,45-48]; 10 in Europe[27,31-33,35-37,40,43,44]; and the remaining three in Asia[26,39,49]. The results of total fractures were available in 12 studies, hip fracture in all studies, distal forearm fracture in eight studies, upper arm fracture in six studies, ankle fracture in four studies, and vertebral fractures in six studies. Study quality was evaluated by NOS, and a study with seven or more stars was regarded as a high-quality study. Overall, seven studies had a score of 9, eight studies had a score of 8, six studies had a score of 7, and the remaining four studies had a score of 6 (S2 Table).

### Total fractures

A total of 12 studies reported an association between DM and the risk of total fractures. The summary RR indicated that compared with non-DM individuals, DM patients were associated with an increased risk of total fractures (RR: 1.32; 95% CI:

1.17–1.48;  $P < 0.001$ ; Fig 2), and substantial heterogeneity was detected ( $I^2 = 97.1\%$ ;  $P < 0.001$ ). A sensitivity analysis revealed that the conclusion was not affected by the sequential exclusion of individual studies from the overall analysis (S3 Table). A subgroup analysis of total fractures based on country, DM type, sex, and study design was performed. The results showed that DM patients had an increased risk of total fractures in nearly all subsets except for studies conducted in Eastern countries (Table 2). Furthermore, the RR ratio for the comparison between T1DM and T2DM of the risk of total fractures was significantly increased, and the association was also statistically significant (ratio of RR: 1.24; 95% CI: 1.08–1.41;  $P = 0.002$ ; Table 2).

Table 2. Subgroup analysis for total fracture based on country, DM types, sex, and study design

| Factors      | Subsets       | RR and 95%CI     | P value | $I^2$ (%) | P value for heterogeneity | Ratio of RR between subgroups | P value for ratios of RR |
|--------------|---------------|------------------|---------|-----------|---------------------------|-------------------------------|--------------------------|
| Country      | Western       | 1.32 (1.17-1.50) | <0.001  | 97.4      | <0.001                    | 1.07 (0.76-1.52)              | 0.690                    |
|              | Eastern       | 1.23 (0.89-1.70) | 0.214   | -         | -                         |                               |                          |
| DM types     | I             | 1.51 (1.35-1.68) | <0.001  | 78.3      | <0.001                    | 1.24 (1.08-1.41)              | 0.002                    |
|              | II            | 1.22 (1.13-1.31) | <0.001  | 83.0      | <0.001                    |                               |                          |
| Sex          | Men           | 1.49 (1.20-1.85) | <0.001  | 96.1      | <0.001                    | 1.14 (0.89-1.46)              | 0.313                    |
|              | Women         | 1.31 (1.16-1.49) | <0.001  | 92.8      | <0.001                    |                               |                          |
| Study design | Prospective   | 1.32 (1.20-1.46) | <0.001  | 83.4      | <0.001                    | 1.01 (0.84-1.21)              | 0.936                    |
|              | Retrospective | 1.31 (1.12-1.54) | 0.001   | 97.6      | <0.001                    |                               |                          |

\*CI: confidence interval; DM: diabetes mellitus; RR: relative risk

## Hip fracture



A total of 25 studies reported an association between DM and the risk of hip fracture. In the pooled analysis, the comparison of DM and non-DM individuals showed a harmful effect on hip fracture (RR: 1.77; 95% CI: 1.56–2.02;  $P < 0.001$ ; Fig 3). Although substantial heterogeneity was detected across the included studies ( $I^2 = 98.0\%$ ;  $P < 0.001$ ), the conclusion did not change after sequential exclusion of individual studies (S4 Table). The results of subgroup analysis for hip fracture are listed in Table 3, and all results indicated that DM had a harmful effect on hip fracture. Furthermore, the RR ratio showed a statistically significant association between DM and the risk of hip fracture in T1DM when compared with that of T2DM (ratio of RR: 3.43; 95% CI: 2.27–5.17;  $P < 0.001$ ).

Table 3. Subgroup analysis for hip fracture based on country, DM types, sex, and study design

| Factors      | Subsets       | RR and 95%CI     | P value | $I^2$ (%) | P value for heterogeneity | Ratio of RR between subgroups | P value for ratios of RR |
|--------------|---------------|------------------|---------|-----------|---------------------------|-------------------------------|--------------------------|
| Country      | Western       | 1.79 (1.56-2.05) | <0.001  | 97.5      | <0.001                    | 1.04 (0.81-1.34)              | 0.759                    |
|              | Eastern       | 1.72 (1.39-2.14) | <0.001  | 89.5      | <0.001                    |                               |                          |
| DM types     | I             | 4.35 (2.91-6.49) | <0.001  | 95.4      | <0.001                    | 3.43 (2.27-5.17)              | <0.001                   |
|              | II            | 1.27 (1.16-1.39) | <0.001  | 85.5      | <0.001                    |                               |                          |
| Sex          | Men           | 2.05 (1.68-2.51) | <0.001  | 97.0      | <0.001                    | 1.00 (0.78-1.29)              | 0.969                    |
|              | Women         | 2.04 (1.76-2.37) | <0.001  | 97.5      | <0.001                    |                               |                          |
| Study design | Prospective   | 2.02 (1.71-2.39) | <0.001  | 91.4      | <0.001                    | 1.09 (0.87-1.36)              | 0.472                    |
|              | Retrospective | 1.86 (1.60-2.16) | <0.001  | 98.7      | <0.001                    |                               |                          |

\*CI: confidence interval; DM: diabetes mellitus; RR: relative risk

### Distal forearm fracture

A total of eight studies reported an association between DM and the risk of distal forearm fracture. The summary RR showed that DM was not associated with the risk of distal forearm fracture (RR: 1.02; 95% CI: 0.88–1.19; P=0.809; Fig 4) and non-significant heterogeneity was observed ( $I^2=27.5\%$ ; P=0.209). The sensitivity analysis suggested that the conclusion was not affected by the exclusion of any specific study (S5 Table). The subgroup analysis indicated the conclusions in each subset continued to be non-significant and no significant differences were observed between subgroups based on country, DM type, sex, or study design (Table 4).

Table 4. Subgroup analysis for distal forearm fracture based on country, DM types, sex, and study design

| Factors      | Subsets       | RR and 95%CI     | P value | $I^2$ (%) | P value for heterogeneity | Ratio of RR between subgroups | P value for ratios of RR |
|--------------|---------------|------------------|---------|-----------|---------------------------|-------------------------------|--------------------------|
| Country      | Western       | 1.04 (0.87-1.23) | 0.687   | 37.7      | 0.141                     | 1.04 (0.48-2.26)              | 0.921                    |
|              | Eastern       | 1.00 (0.47-2.13) | 1.000   | -         | -                         |                               |                          |
| DM types     | I             | 1.09 (0.43-2.75) | 0.861   | 78.3      | 0.032                     | 1.12 (0.43-2.94)              | 0.812                    |
|              | II            | 0.97 (0.66-1.09) | 0.573   | 13.1      | 0.323                     |                               |                          |
| Sex          | Men           | 1.04 (0.66-1.65) | 0.863   | 58.5      | 0.090                     | 1.12 (0.70-1.80)              | 0.644                    |
|              | Women         | 0.93 (0.82-1.05) | 0.257   | 6.3       | 0.380                     |                               |                          |
| Study design | Prospective   | 1.00 (0.83-1.19) | 0.982   | 41.0      | 0.094                     | 0.93 (0.69-01.27)             | 0.662                    |
|              | Retrospective | 1.07 (0.84-1.37) | 0.565   | 0.0       | 0.944                     |                               |                          |

\*CI: confidence interval; DM: diabetes mellitus; RR: relative risk

### Upper arm fracture

A total of six studies reported an association between DM and the risk of upper arm fracture. Compared with non-DM individuals, DM patients had a higher risk of upper arm fracture (RR: 1.47; 95% CI: 1.02–2.10; P=0.037; Fig 5), and evidence of significant heterogeneity was observed ( $I^2=84.9\%$ ;  $P<0.001$ ). The sensitivity analysis indicated the results varied possibly due to the smaller number of studies on fractures occurring in the upper arm (S6 Table). The subgroup analysis indicated that DM had no significant impact on upper arm fracture in men, whereas this risk increased in other subsets (Table 5).

Table 5. Subgroup analysis for upper arm fracture based on country, DM types, sex, and study design.

| Factors      | Subsets       | RR and 95%CI     | P value | $I^2$ (%) | P value for heterogeneity | Ratio of RR between subgroups | P value for ratios of RR |
|--------------|---------------|------------------|---------|-----------|---------------------------|-------------------------------|--------------------------|
| Country      | Western       | 1.47 (1.02-2.10) | 0.037   | 84.9      | <0.001                    | -                             | -                        |
|              | Eastern       | -                | -       | -         | -                         | -                             | -                        |
| DM types     | I             | 1.83 (1.41-2.39) | <0.001  | 0.0       | 0.487                     | 1.19 (0.82-1.72)              | 0.359                    |
|              | II            | 1.54 (1.19-1.99) | 0.001   | 79.6      | <0.001                    | -                             | -                        |
| Sex          | Men           | 1.21 (0.80-1.83) | 0.368   | 73.2      | 0.011                     | 0.82 (0.50-1.36)              | 0.450                    |
|              | Women         | 1.47 (1.10-1.96) | 0.009   | 79.1      | <0.001                    | -                             | -                        |
| Study design | Prospective   | 1.38 (1.07-1.76) | 0.011   | 76.0      | <0.001                    | 0.80 (0.47-1.36)              | 0.412                    |
|              | Retrospective | 1.72 (1.08-2.73) | 0.022   | 68.5      | 0.075                     | -                             | -                        |

\*CI: confidence interval; DM: diabetes mellitus; RR: relative risk

### Ankle fracture

A total of four studies reported an association between DM and the risk of ankle

fracture. The risk of ankle fracture significantly increased in DM patients (RR: 1.24; 95% CI: 1.10–1.40;  $P < 0.001$ ; Fig 6), with no evidence of heterogeneity ( $I^2 = 0.0\%$ ;  $P = 0.400$ ). The results of the sensitivity analysis were consistent with those of the overall analysis and are shown in S7 Table. The subgroup analysis showed no association between DM and ankle fracture risk in men, whereas in other subsets, the risk was significantly increased (Table 6). Furthermore, T1DM patients were at a greater risk of ankle fracture than were T2DM patients (ratio of RR: 1.71; 95% CI: 1.06–1.78;  $P = 0.029$ ; Table 6).

Table 6. Subgroup analysis for ankle fracture based on country, DM types, sex, and study design.

| Factors      | Subsets       | RR and 95%CI     | P value | $I^2$ (%) | P value for heterogeneity | Ratio of RR between subgroups | P value for ratios of RR |
|--------------|---------------|------------------|---------|-----------|---------------------------|-------------------------------|--------------------------|
| Country      | Western       | 1.24 (1.10-1.40) | <0.001  | 0.0       | 0.400                     | -                             | -                        |
|              | Eastern       | -                | -       | -         | -                         | -                             | -                        |
| DM types     | I             | 1.97 (1.24-3.14) | 0.004   | 29.3      | 0.234                     | 1.71 (1.06-2.78)              | 0.029                    |
|              | II            | 1.15 (1.01-1.31) | 0.029   | 0.0       | 0.886                     |                               |                          |
| Sex          | Men           | 1.35 (0.68-2.65) | 0.390   | 74.1      | 0.021                     | 0.96 (0.46-2.01)              | 0.922                    |
|              | Women         | 1.40 (1.07-1.84) | 0.014   | 51.6      | 0.083                     |                               |                          |
| Study design | Prospective   | 1.24 (1.10-1.40) | <0.001  | 0.0       | 0.400                     | -                             | -                        |
|              | Retrospective | -                | -       | -         | -                         |                               |                          |

\*CI: confidence interval; DM: diabetes mellitus; RR: relative risk

### Vertebrae fracture

A total of six studies reported an association between DM and the risk of vertebrae

fracture. The results of pooled analysis indicated no significant association between DM and vertebrae fracture risk (RR: 1.56; 95% CI: 0.78–3.12; P=0.209; Fig 7) and evidence of significant heterogeneity ( $I^2=96.3\%$ ;  $P<0.001$ ). As a result, a sensitivity analysis was conducted and, although each study was sequentially excluded from the pooled analysis, the conclusion was not affected by the exclusion of any specific study (S8 Table). The subgroup analysis indicated that DM was associated with an increased risk of vertebrae fracture in retrospective cohort studies, whereas no significant effect in other subsets and no difference between subgroups were observed (Table 7).

Table 7. Subgroup analysis for vertebrae fracture based on country, DM types, sex, and study design.

| Factors      | Subsets       | RR and 95%CI      | P value | $I^2$ (%) | P value for heterogeneity | Ratio of RR between subgroups | P value for ratios of RR |
|--------------|---------------|-------------------|---------|-----------|---------------------------|-------------------------------|--------------------------|
| Country      | Western       | 1.74 (0.82-3.69)  | 0.148   | 96.5      | <0.001                    | 1.93 (0.79-4.71)              | 0.146                    |
|              | Eastern       | 0.90 (0.56-1.45)  | 0.664   | -         | -                         |                               |                          |
| DM types     | I             | -                 | -       | -         | -                         | -                             | -                        |
|              | II            | 1.74 (0.96-3.16)  | 0.070   | 96.7      | <0.001                    |                               |                          |
| Sex          | Men           | 2.26 (0.40-12.73) | 0.354   | 88.9      | 0.003                     | 1.42 (0.23-8.85)              | 0.706                    |
|              | Women         | 1.59 (0.88-2.87)  | 0.125   | 84.1      | <0.001                    |                               |                          |
| Study design | Prospective   | 1.36 (0.88-2.11)  | 0.167   | 66.4      | 0.018                     | 0.54 (0.25-1.14)              | 0.105                    |
|              | Retrospective | 2.54 (1.37-4.70)  | 0.003   | 96.1      | <0.001                    |                               |                          |

\*CI: confidence interval; DM: diabetes mellitus; RR: relative risk

### Publication bias

---

1  
2  
3  
4 Review of the funnel plots could not rule out a publication bias for total fractures (Fig  
5  
6 8). Furthermore, the Egger and Begg test results showed no evidence of a publication  
7  
8 bias (P value for Egger: 0.311; P value for Begg: 0.537).  
9  
10

## 11 12 13 14 **DISCUSSION**

15  
16 Because the characteristics of DM patients might have affected the incidence of  
17  
18 fracture at different sites, we considered cohort studies to evaluate the correlations  
19  
20 between DM and fractures according to country, DM type, sex, and study design. The  
21  
22 meta-analysis included 7,185,572 participants from 16 prospective cohort studies and  
23  
24 nine retrospective cohort studies with a broad range of individual characteristics. The  
25  
26 findings of this study indicated that DM was associated with an elevated risk of total,  
27  
28 hip, upper arm, and ankle fractures but had no effect on distal forearm and vertebral  
29  
30 fractures. The findings of the subgroup analyses were mostly consistent with those of  
31  
32 the overall analysis except for those of total fracture in Eastern countries and upper  
33  
34 arm and ankle fractures in men. Finally, compared with T2DM, T1DM was associated  
35  
36 with a greater risk of total, hip, and ankle fracture.  
37  
38  
39  
40  
41  
42  
43  
44

45 A previous study based on 14 observational studies evaluated the association between  
46  
47 T1DM and the risk of fractures[50]. The results indicated T1DM was associated with  
48  
49 a higher risk of total (RR, 3.16; P=0.002), hip (RR, 3.78; P<0.001), and spinal  
50  
51 fractures (RR, 2.88; P<0.001). Moayeri et al. conducted a meta-analysis to evaluate  
52  
53 the association between T2DM and fracture risk and possible risk factors, suggesting  
54  
55  
56  
57  
58  
59  
60

---

1  
2  
3  
4 an increased risk of hip, vertebral, and foot fractures in T2DM patients and no  
5  
6 significant association between T2DM and wrist, proximal humerus, and ankle  
7  
8 fractures. They also reported patients with T2DM had an increased risk of total  
9  
10 fracture that increased with age, duration of diabetes, and insulin therapy[51].  
11  
12 However, different study designs might bias this association and the role of DM type  
13  
14 was not evaluated in previous studies. Similar limitations of two other meta-analyses  
15  
16 have already been described[10,11]. Therefore, the present meta-analysis of available  
17  
18 cohort studies was performed to address these limitations.  
19  
20  
21  
22

23  
24 The pooled results showed a significantly increased risk of total, hip, upper arm, and  
25  
26 ankle fractures in DM patients compared with those in non-DM individuals; this  
27  
28 result is consistent with those of previous studies[10,11,50]. However, several studies  
29  
30 reported inconsistent results. After adjusting for BMI, sex, race, and age, Strotmeyer  
31  
32 et al.[25] indicated that T2DM had no significant effect on the risk of hip fracture.  
33  
34 Jung et al.[26] showed that the RR in the T2DM cohort increased the risk of total and  
35  
36 hip fractures, although these increases were not statistically significant. One possible  
37  
38 explanation for this could be the percentage of patients newly diagnosed with DM that  
39  
40 might be higher than that in other studies and the increase in insulin level might affect  
41  
42 bone metabolism[52]. Furthermore, a smaller sample size and a lower incidence of  
43  
44 fracture events were associated with lower statistical power and broad 95% CI.  
45  
46 Finally, the summary results for upper arm and ankle fractures might have varied due  
47  
48 to the limited number of studies included; the interaction of these associations with  
49  
50  
51  
52  
53  
54  
55  
56  
57  
58  
59  
60

---

age, severity of DM, and antidiabetic drugs should be explored[51].

There were no significant differences between DM patients and non-DM individuals with respect to distal forearm fracture. Most individual studies reported similar results, whereas the FRAILCO study indicated that DM was associated with a lower risk of distal forearm fracture[27]. The reason for this difference could be the main role of this decrease in patients taking oral antidiabetics compared with non-DM individuals. Furthermore, the incidence of distal forearm fracture might be underestimated in register-based data. Finally, distal forearm fractures usually develop earlier in life, and the age of the participants in the individual studies might play a confounding role. Similar results were found for vertebral fractures. Two of the included studies indicated that T2DM was associated with a higher risk of vertebral fractures[42,44]. The reason for this finding could be the baseline levels of serum  $\gamma$ -glutamyl transferase and metabolic syndrome in women and alcohol overconsumption, which are associated with higher serum  $\gamma$ -glutamyl transferase levels in men and may play an important role in the risk of vertebral and ankle fractures [53-55].

The results of the stratified analysis were generally consistent with those of the overall analysis. However, two breakthroughs should be highlighted: (1) T1DM was associated with a higher risk for total, hip, and ankle fractures compared with that in T2DM. The possible reasons for this include the different reasons for the incidence of fracture, such as differences in BMI between T1DM and T2DM, which played a protective role in fractures[56]. Furthermore, while BMI is a major determinant of



1  
2  
3  
4 BMD and fracture risk, not all studies adjusted for the impact of BMI, which could  
5  
6 have affected the intrinsic correlation of DM and fractures. (2) Although there was no  
7  
8 significant effect on upper arm and ankle fractures in men with T2DM, these results  
9  
10 might be unreliable due to the small number of studies included. This finding should  
11  
12 be verified in future large-scale cohort studies.  
13  
14

15  
16 This meta-analysis had several limitations. The DM diagnosis in individual studies  
17  
18 was not consistent, which may have introduced confounders in the representative DM  
19  
20 cohort. Furthermore, retrospective cohort studies might introduce recall and selection  
21  
22 biases, which could affect the evidence levels and representativeness of the cohorts. In  
23  
24 addition, the adjusted models differed across the included studies; these factors might  
25  
26 have played an important role in the development of fractures. Additionally, the  
27  
28 substantial heterogeneity could not be explored completely due to the unavailability  
29  
30 of several important factors, including metabolic and lifestyle. Finally, there were  
31  
32 limitations inherent to any meta-analysis, including a publication bias and the lack of  
33  
34 availability of individual data.  
35  
36  
37  
38  
39  
40  
41

42 In conclusion, DM was associated with total, hip, upper arm, and ankle fractures.  
43  
44 Furthermore, patients with T1DM had a higher risk of total, hip, and ankle fractures  
45  
46 compared with those with T2DM. There was no sex difference in fractures at different  
47  
48 sites. Future studies are warranted to clarify the effect of anti-diabetic therapies and  
49  
50 investigate effective prevention strategies for fractures at different sites.  
51  
52  
53  
54  
55  
56  
57  
58  
59  
60

---

### **Authors' Contributions**

Jian-Ling Du and Hao Wang contributed to conception and design; Hao Wang, Ying Ba, Qian Xing contributed to acquisition, analysis and interpretation of data; Hao Wang and Jian-Ling Du were involved in drafting or critical revision of the manuscript. All the authors approved the final version.

**Conflict of interests:** All authors declare no conflict of interest.

**Funding statement:** This research did not receive any specific grant from funding agencies in the public, commercial, or not-for-profit sectors.

**Data sharing statement:** No additional data available.

---

## References:

1. Wild S, Roglic G, Green A, Sicree R, King, H. Global prevalence of diabetes: estimates for the year 2000 and projections for 2030. *Diabetes Care* 2004;27: 1047-1053.
2. Boyle JP, *et al.* Projection of diabetes burden through 2050: impact of changing demography and disease prevalence in the U.S. *Diabetes Care* 2001; **24**: 1936-1940.
3. Ray KK, *et al.* Effect of intensive control of glucose on cardiovascular outcomes and death in patients with diabetes mellitus: a meta-analysis of randomised controlled trials. *Lancet* 2009; **373**: 1765-72.
4. Peters SA, Huxley RR, Woodward M. Diabetes as a risk factor for stroke in women compared with men: a systematic review and meta-analysis of 64 cohorts, including 775,385 individuals and 12,539 strokes. *Lancet* 2014; **383**: 1973-80.
5. Tsilidis KK, Kasimis JC, Lopez DS, Ntzani EE, Ioannidis JP. Type 2 diabetes and cancer: umbrella review of meta-analyses of observational studies. *BMJ* 2015;**350**: g7607.
6. Narres M, *et al.* The Incidence of End-Stage Renal Disease in the Diabetic (Compared to the Non-Diabetic) Population: A Systematic Review. *PLoS One* 2016; **11**: e0147329.
7. Carnevale V, Romagnoli E, D'Erasmio E. Skeletal involvement in patients with diabetes mellitus. *Diabetes Metab Res Rev* 2004;**20**: 196-204.
8. Raskin P, Stevenson MRM, Barilla DE, Pak CY. The hypercalciuria of diabetes mellitus: its amelioration with insulin. *Clin Endocrinol* 1978;**9**: 329-335.
9. McNair P, *et al.* Bone mineral loss in insulin-treated diabetes mellitus: studies on pathogenesis. *Acta Endocrinol* 1979;**90**: 463-472.
10. Vestergaard P. Discrepancies in bone mineral density and fracture risk in patients with type 1 and type 2 diabetes: a meta-analysis. *Osteoporos Int* 2007; **18**: 427-444.
11. Fan Y, Wei Y, Lang Y, Liu Y. Diabetes mellitus and risk of hip fractures: a meta-analysis. *Osteoporos Int* 2016;**27**: 219-228.
12. Giangregorio LM, *et al.* FRAX Underestimates Fracture Risk in Patients With Diabetes. *J Bone Miner Res* 2012;**27**: 301-8.
13. Fraser LA, *et al.* Clinical risk factors for fracture in diabetes: a matched cohort analysis. *J Clin*

---

*Densitom* 2011;**14**: 416-21.

14. Moher D, Liberati A, Tetzlaff J, Altman DG; PRISMA Group. Preferred reporting items for systematic reviews and meta-analyses: the PRISMA statement. *PLoS Med* 2009; **6**: e1000097.

15. Wells G, Shea B, O'Connell D. The Newcastle-Ottawa Scale (NOS) for assessing the quality of nonrandomised studies in meta-analyses. Ottawa (ON): Ottawa Hospital Research Institute 2009. Available: [http://www.ohri.ca/programs/clinical\\_epidemiology/oxford.htm](http://www.ohri.ca/programs/clinical_epidemiology/oxford.htm).

16. DerSimonian R, Laird N. Meta-analysis in clinical trials. *Control Clin Trials* 1986;**7**: 177- 88.

17. Ades AE, Lu G, Higgins JP. The interpretation of random-effects metaanalysis in decision models. *Med Decis Making* 2005;**25**: 646–54.

18. Deeks JJ, Higgins JPT, Altman DG. Analyzing data and undertaking meta-analyses. In: Higgins J, Green S, eds. *Cochrane Handbook for Systematic Reviews of Interventions* 5.0.1. Oxford, UK: The Cochrane Collaboration: 2008; chap 9.

19. Higgins JPT, Thompson SG, Deeks JJ, Altman DG. Measuring inconsistency in meta-analyses. *BMJ* 2003; **327**: 557–60.

20. Tobias, A. Assessing the influence of a single study in meta-analysis. *Stata Tech Bull* 1999; **47**: 15–17.

21. Altman DG, Bland JM. Interaction revisited: the difference between two estimates. *BMJ* 2003; **326**: 219.

22. Li XH, Yu FF, Zhou YH, He J. Association between alcohol consumption and the risk of incident type 2 diabetes: a systematic review and dose-response meta-analysis. *Am J Clin Nutr* 2016; **103**: 818-29.

23. Egger M, Davey Smith G, Schneider M, Minder C. Bias in meta-analysis detected by a simple, graphical test. *BMJ* 1997; **315**: 629–34.

24. Begg CB, Mazumdar M. Operating characteristics of a rank correlation test for publication bias. *Biometrics* 1994; **50**: 1088–1101.

25. Strotmeyer ES, *et al*. Potential explanatory factors for higher incident hip fracture risk in older diabetic adults. *Curr Gerontol Geriatr Res* 2011; **2011**: 979270.

26. Jung JK, *et al*. Fracture Incidence and Risk of Osteoporosis in Female Type 2 Diabetic

- 
- 1  
2  
3 Patients in Korea. *Diabetes Metab J* 2012; **36**: 144-150.
- 4  
5 27. Wallander M, Axelsson KF, Nilsson AG, Lundh D, Lorentzon M. Type 2 Diabetes and Risk of  
6 Hip Fractures and Non-Skeletal Fall Injuries in the Elderly: A Study From the Fractures and Fall  
7 Injuries in the Elderly Cohort (FRAILCO). *J Bone Miner Res* 2016: doi: 10.1002/jbmr.3002.
- 8  
9 28. Dobnig H, *et al.* Type 2 diabetes mellitus in nursing home patients: effects on bone turnover,  
10 bone mass, and fracture risk. *J Clin Endocrinol Metab* 2016;**91**: 3355-63.
- 11  
12 29. Ottenbacher KJ, Ostir GV, Peek MK, Goodwin JS, Markides KS. Diabetes mellitus as a risk  
13 factor for hip fracture in mexican american older adults. *J Gerontol A Biol Sci Med Sci* 2002; **57**:  
14 M648-53.
- 15  
16 30. Nicodemus KK, Folsom AR, Iowa Women's Health Study. Type 1 and type 2 diabetes and  
17 incident hip fractures in postmenopausal women. *Diabetes Care* 2001; **24**: 1192-7.
- 18  
19 31. Hothersall EJ, *et al.* Contemporary risk of hip fracture in type 1 and type 2 diabetes: a national  
20 registry study from Scotland. *J Bone Miner Res* 2014;**29**: 1054-60.
- 21  
22 32. Martinez-Laguna D, *et al.* Incident type 2 diabetes and hip fracture risk: a population-based  
23 matched cohort study. *Osteoporos Int* 2015; **26**: 827-833.
- 24  
25 33. Weber DR, Haynes K, Leonard MB, Willi SM, Denburg MR. Type 1 Diabetes Is Associated  
26 With an Increased Risk of Fracture Across the LifeSpan: A Population-Based Cohort Study Using  
27 The Health Improvement Network (THIN). *Diabetes Care* 2015; **38**: 1913-1920.
- 28  
29 34. Janghorbani M, Feskanich D, Willett WC, Hu F. Prospective study of diabetes and risk of hip  
30 fracture: the Nurses' Health Study. *Diabetes Care* 2006;**29**: 1573-8.
- 31  
32 35. Oei L, *et al.* High bone mineral density and fracture risk in type 2 diabetes as skeletal  
33 complications of inadequate glucose control: the Rotterdam Study. *Diabetes Care* 2013; **36**:  
34 1619-28.
- 35  
36 36. Ahmed LA, Joakimsen RM, Berntsen GK, Fønnebo V, Schirmer H. Diabetes mellitus and the  
37 risk of non-vertebral fractures: the Tromsø study. *Osteoporos Int* 2006;**17**: 495-500.
- 38  
39 37. Miao J, Brismar K, Nyrén O, Ugarph-Morawski A, Ye W. Elevated hip fracture risk in type 1  
40 diabetic patients: a population-based cohort study in Sweden. *Diabetes Care* 2005; **28**: 2850-5.
- 41  
42 38. Ivers RQ, Cumming RG, Mitchell P, Peduto AJ; Blue Mountains Eye Study. Diabetes and  
43  
44  
45  
46  
47  
48  
49  
50  
51  
52  
53  
54  
55  
56  
57  
58  
59  
60

- 
- 1  
2  
3 risk of fracture: The Blue Mountains Eye Study. *Diabetes Care* 2001; **24**: 1198-203.
- 4  
5 39. Koh WP, *et al.* Diabetes and risk of hip fracture in the Singapore Chinese Health Study.  
6  
7 *Diabetes Care* 2010;**33**: 1766-70.
- 8  
9 40. Meyer HE, Tverdal A, Falch JA. Risk factors for hip fracture in middle-aged Norwegian  
10  
11 women and men. *Am J Epidemiol* 1993;**137**: 1203-11.
- 12  
13 41. Lipscombe LL, Jamal SA, Booth GL, Hawker GA. The risk of hip fractures in older  
14  
15 individuals with diabetes: a population-based study. *Diabetes Care* 2007;**30**: 835-41.
- 16  
17 42. Melton LJ, Leibson CL, Achenbach SJ, Therneau TM, Khosla S. Fracture risk in type 2  
18  
19 diabetes: update of a population-based study. *J Bone Miner Res* 2008; **23**: 1334-42.
- 20  
21 43. Forsen L, Meyer HE, Midthjell K, Edna TH. Diabetes mellitus and the incidence of hip  
22  
23 fracture: results from the Nord-Trøndelag Health Survey. *Diabetologia* 1999;**42**: 920-925.
- 24  
25 44. Holmberg AH, *et al.* Risk factors for fragility fracture in middle age. A prospective  
26  
27 population-based study of 33,000 men and women. *Osteoporos Int* 2006;**17**: 1065-1077.
- 28  
29 45. Bonds DE, *et al.* Risk of fracture in women with type 2 diabetes: the Women's Health  
30  
31 Initiative Observational Study. *J Clin Endocrinol Metab* 2006;**91**: 3404-10.
- 32  
33 46. Leslie WD, *et al.* Biphasic fracture risk in diabetes: A population-based study. *Bone* 2007; **40**:  
34  
35 1595-1601.
- 36  
37 47. Majumdar SR, *et al.* Longer Duration of Diabetes Strongly Impacts Fracture Risk Assessment:  
38  
39 The Manitoba BMD Cohort. *J Clin Endocrinol Metab* 2016;**101**: 4489-4496.
- 40  
41 48. Schwartz AV, *et al.* Older Women with Diabetes Have an Increased Risk of Fracture: A  
42  
43 Prospective Study. *J Clin Endocrinol Metab* 2001;**86**: 32-38.
- 44  
45 49. Chen HF, Ho CA, Li CY. Increased risks of hip fracture in diabetic patients of Taiwan: a  
46  
47 population-based study. *Diabetes Care* 2008;**31**: 75-80.
- 48  
49 50. Shah VN, Shah CS, Snell-Bergeon JK. Type 1 diabetes and risk of fracture: meta-analysis and  
50  
51 review of the literature. *Diabet Med* 2015;**32**: 1134-42.
- 52  
53 51. Moayeri A, *et al.* Fracture risk in patients with type 2 diabetes mellitus and possible risk  
54  
55 factors: a systematic review and meta-analysis. *Ther Clin Risk Manag* 2017;**13**: 455-468.
- 56  
57 52. Schwartz AV, *et al.* Pentosidine and increased fracture risk in older adults with type 2 diabetes.

---

1  
2  
3 *J Clin Endocrinol Metab* 2009;**94**: 2380-6.  
4

5 53. Banciu T, Weidenfeld H, Marcoane E, Berinde L. Serum gamma- glutamyltranspeptidase  
6 assay in the detection of alcohol consumers and in the early and stadial  
7 diagnosis of alcoholic liver disease. *Med Interne* 1983;**21**:23-9.  
8  
9

10 54. Trell E, Kristenson H, Fex G. Alcohol-related problems in middle-aged men with elevated  
11 serum gamma-glutamyltransferase: a preventive medical investigation. *J Stud Alcohol* 1984;  
12  
13 **45**:302-309  
14  
15

16 55. Yokoyama H, Moriya S, Homma Y, Ogawa T. Association between gamma-glutamyl  
17 transpeptidase activity and status of disorders constituting insulin resistance syndrome. *Alcohol*  
18  
19 *Clin Exp Res* 2003; **27**:22S–25S  
20  
21

22 56. De Laet C, *et al.* Body mass index as a predictor of fracture risk: a meta-analysis.  
23  
24 *Osteoporos Int* 2005; **16**:1330-8.  
25  
26  
27  
28  
29  
30  
31  
32  
33  
34  
35  
36  
37  
38  
39  
40  
41  
42  
43  
44  
45  
46  
47  
48  
49  
50  
51  
52  
53  
54  
55  
56  
57  
58  
59  
60

---

**Figure legends:**

Fig 1. Study selection process.

Fig 2. Association between DM and the risk of total fractures.

Fig 3. Association between DM and the risk of hip fracture.

Fig 4. Association between DM and the risk of distal forearm fracture.

Fig 5. Association between DM and the risk of upper arm fracture.

Fig 6. Association between DM and the risk of ankle fracture.

Fig 7. Association between DM and the risk of vertebrae fracture.

Fig 8. Publish bias for total fractures.

**Supporting information**

S1 Table. Additional characteristic of studies included

S2 Table. Quality scores of prospective cohort studies using Newcastle-Ottawa Scale.

S3 Table. Sensitivity analysis for total fractures.

S4 Table. Sensitivity analysis for hip fracture.

S5 Table. Sensitivity analysis for distal forearm fracture.

S6 Table. Sensitivity analysis for upper arm fracture.

S7 Table. Sensitivity analysis for ankle fracture.

S8 Table. Sensitivity analysis for vertebrae fracture.

Checklist S1. PRISMA Checklist

Supplemental 1. Searching strategy in PubMed



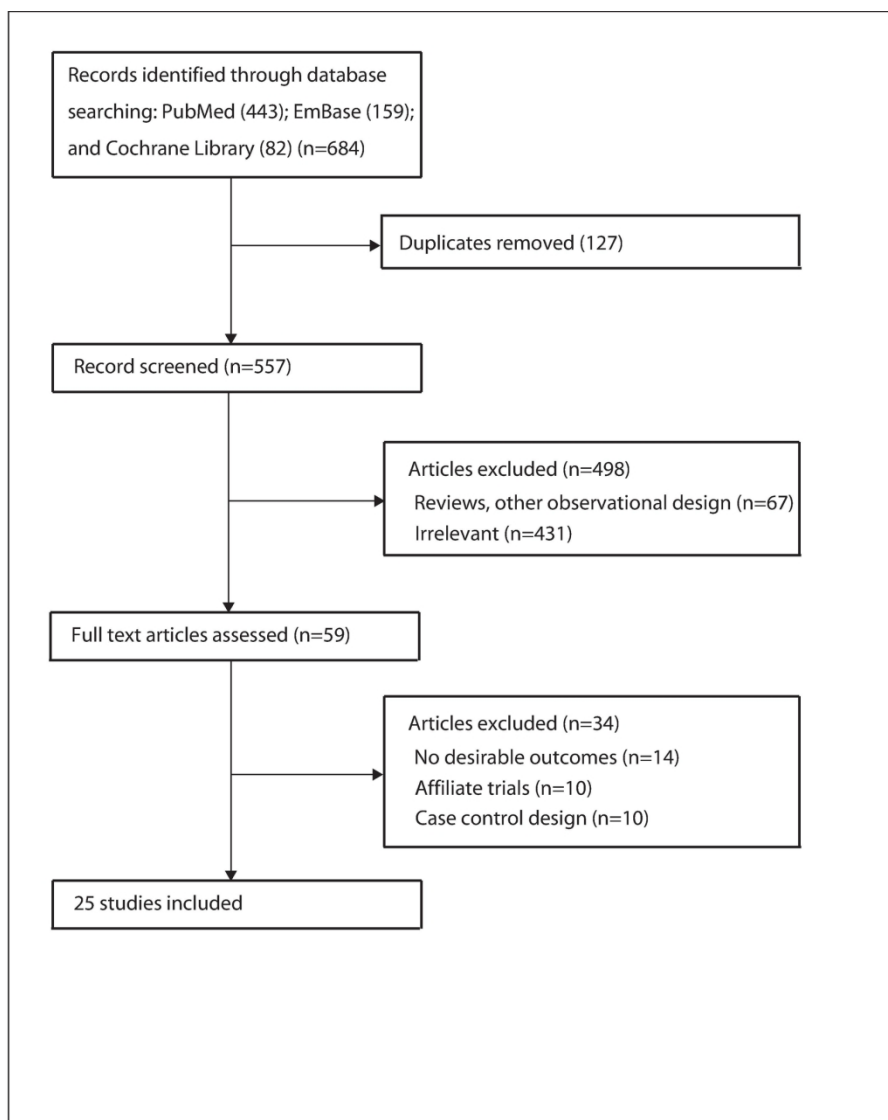

Fig 1. Study selection process.

168x188mm (300 x 300 DPI)

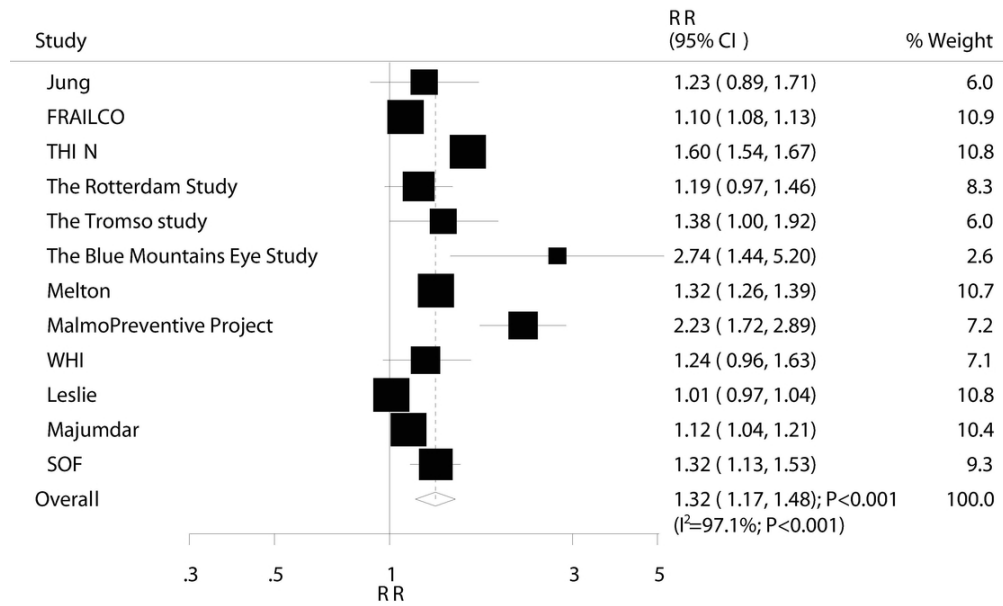

Fig 2. Association between DM and the risk of total fractures.

94x56mm (300 x 300 DPI)

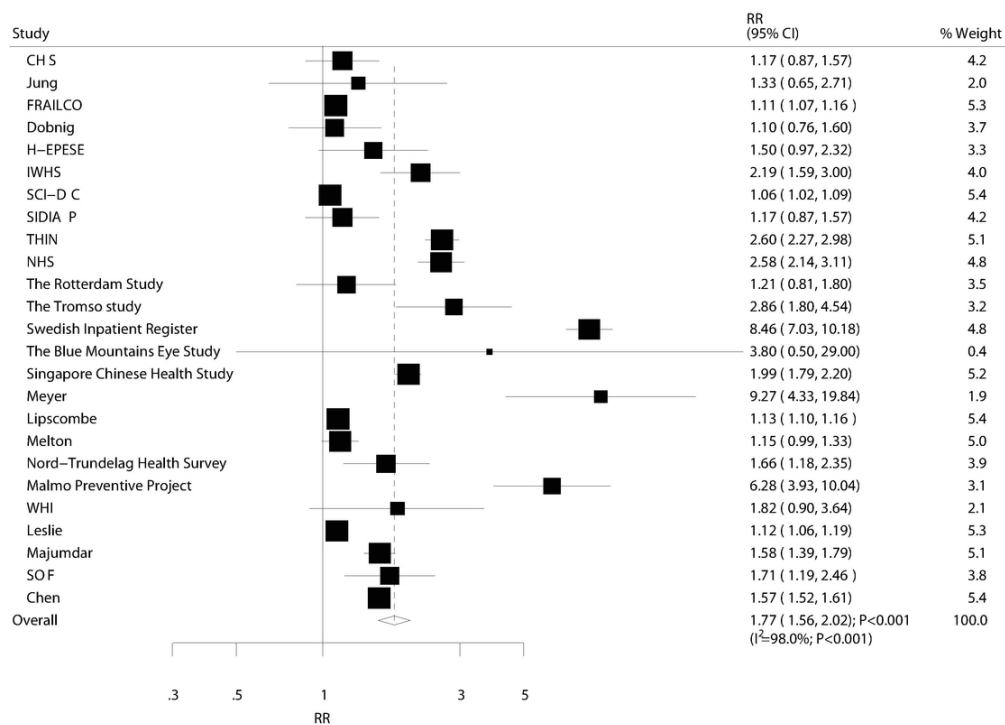

Fig 3. Association between DM and the risk of hip fracture.

93x67mm (300 x 300 DPI)

1  
2  
3  
4  
5  
6  
7  
8  
9  
10  
11  
12  
13  
14  
15  
16  
17  
18  
19  
20  
21  
22  
23  
24  
25  
26  
27  
28  
29  
30  
31  
32  
33  
34  
35  
36  
37  
38  
39  
40  
41  
42  
43  
44  
45  
46  
47  
48  
49  
50  
51  
52  
53  
54  
55  
56  
57  
58  
59  
60

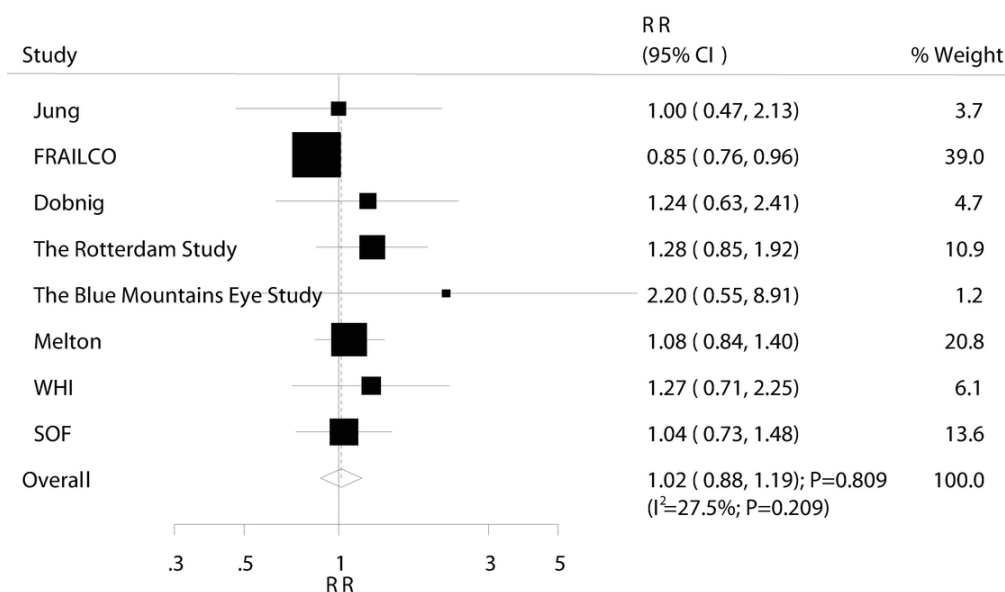

Fig 4. Association between DM and the risk of distal forearm fracture.

93x54mm (300 x 300 DPI)

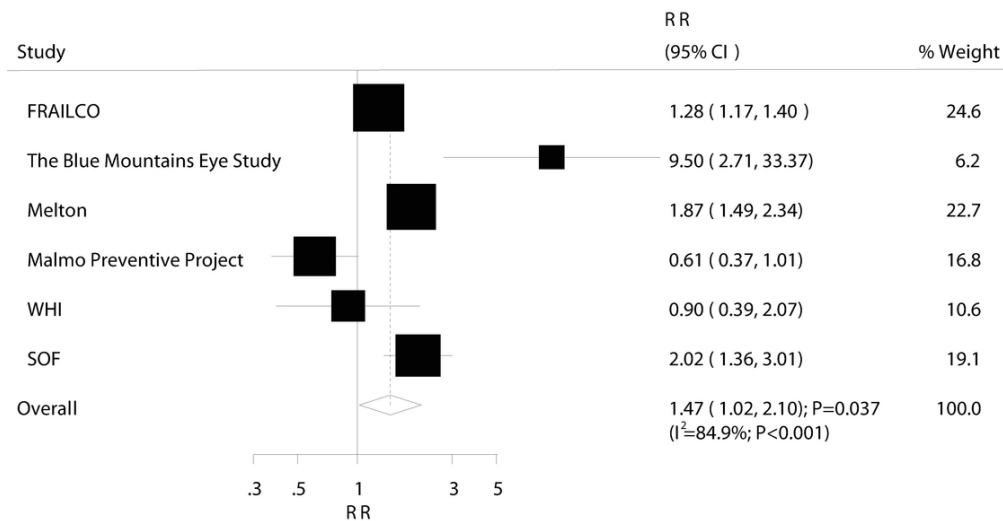

Fig 5. Association between DM and the risk of upper arm fracture.

94x48mm (300 x 300 DPI)

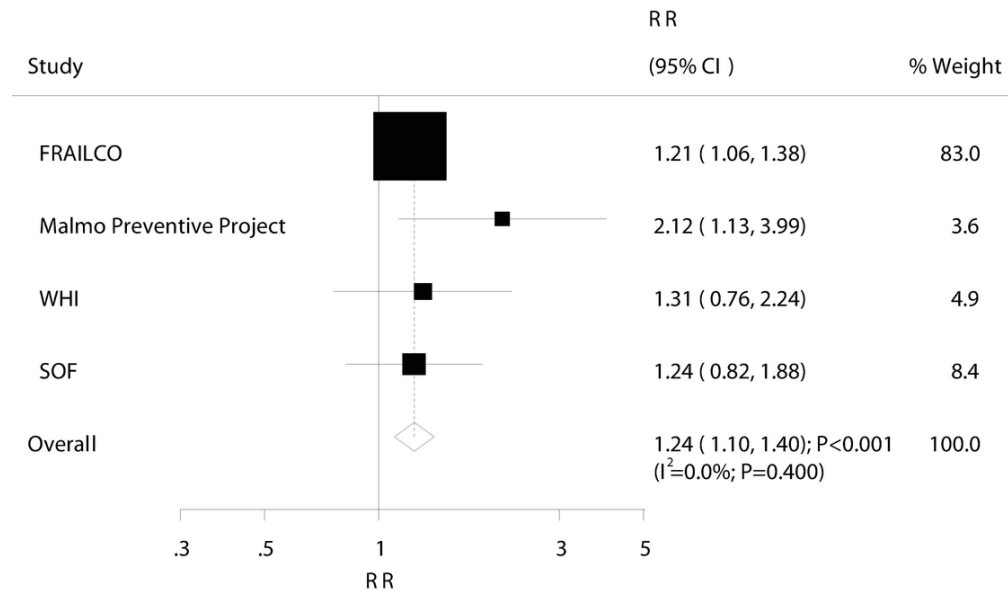

Fig 6. Association between DM and the risk of ankle fracture.

94x55mm (300 x 300 DPI)

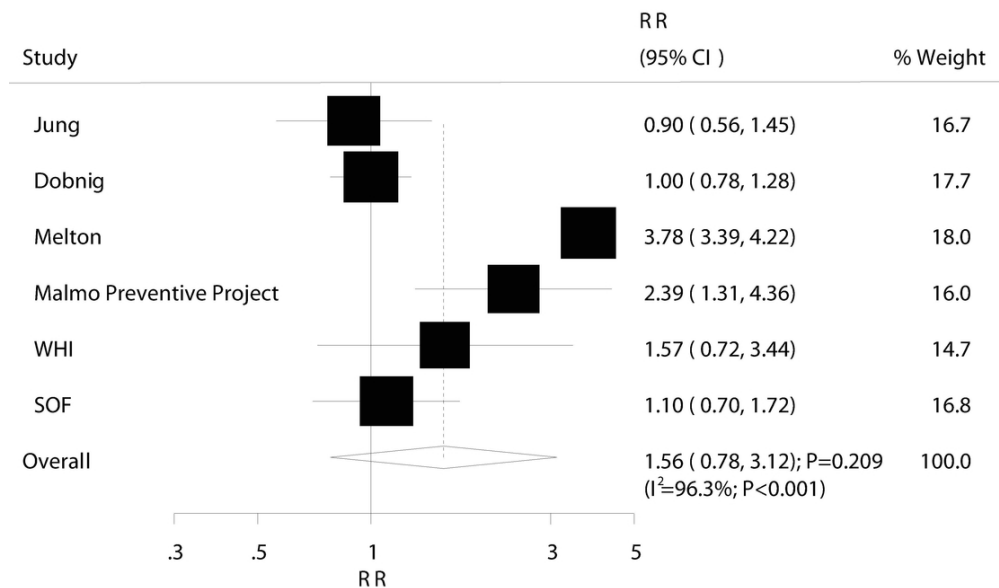

Fig 7. Association between DM and the risk of vertebrae fracture.

94x54mm (300 x 300 DPI)

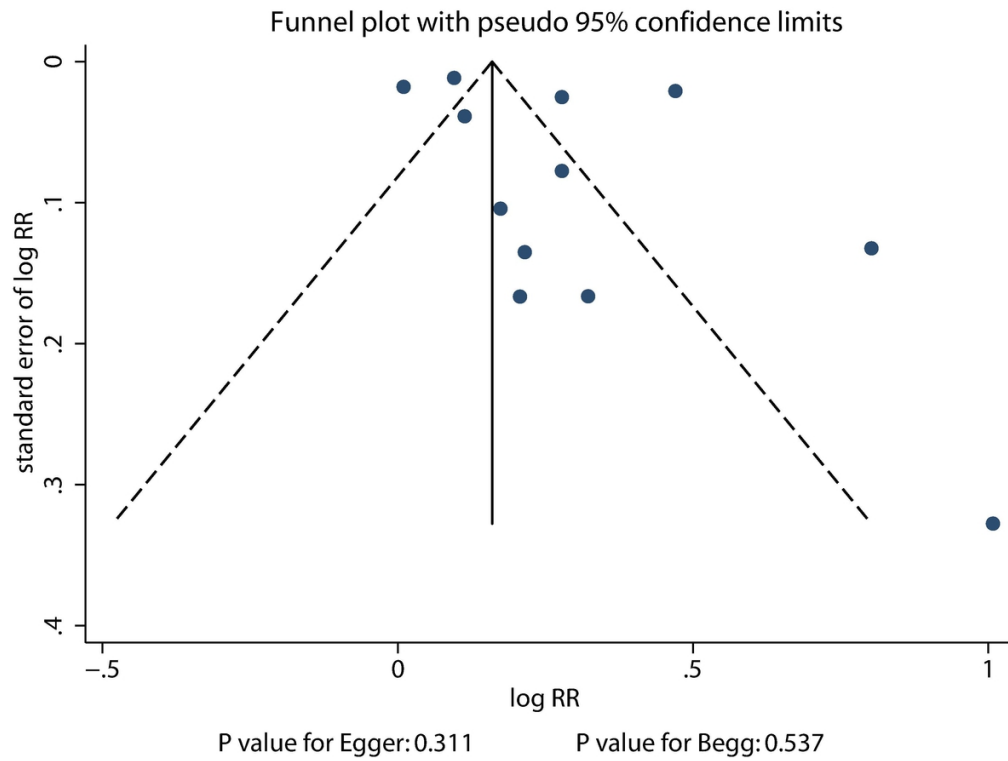

Fig 8. Publish bias for total fractures.

99x74mm (300 x 300 DPI)



Table S1. Additional characteristic of studies included

| Study        | Current smoker (%) | BMI (kg/m <sup>2</sup> ) | DM ascertainment                                                                                                                                                                                                                                                                                                                                                                                                                                                                                                                                                                                                                                                                                                                                                                                                                                    | Adjusted factors                                                                                                               |
|--------------|--------------------|--------------------------|-----------------------------------------------------------------------------------------------------------------------------------------------------------------------------------------------------------------------------------------------------------------------------------------------------------------------------------------------------------------------------------------------------------------------------------------------------------------------------------------------------------------------------------------------------------------------------------------------------------------------------------------------------------------------------------------------------------------------------------------------------------------------------------------------------------------------------------------------------|--------------------------------------------------------------------------------------------------------------------------------|
| CHS [25]     | 12.0               | 26.7                     | hypoglycemic medication use or a fasting glucose $\geq 126$ mg/dL                                                                                                                                                                                                                                                                                                                                                                                                                                                                                                                                                                                                                                                                                                                                                                                   | Age, sex, race, BMI, AAI<0.9                                                                                                   |
| Jung [26]    | NA                 | <25.0                    | oral hypoglycemic agents or received insulin treatment                                                                                                                                                                                                                                                                                                                                                                                                                                                                                                                                                                                                                                                                                                                                                                                              | Age                                                                                                                            |
| FRAILCO [27] | NA                 | 25.4                     | “treatment with insulin” as any known prescriptions of insulin and “treatment with oral antidiabetics” as any prescription of non-insulin antidiabetics (including injectable GLP-1 analogues) in the Drug Dispensation Register. Because many patients receive their diagnosis of type 2 diabetes in primary-care units and thus not included in the Patient Register and because of possible misclassifications between ICD E10 to E11, patients were classified as type 1 diabetes if they were diagnosed with E10 and had received prescriptions of insulin but no other non-insulin antidiabetic medications. We subsequently defined type 2 diabetes as all other patients with diabetes, based on either a diagnosis of E10 with oral antidiabetics, E11, or without any diagnosis but with known prescriptions of antidiabetic medications. | Age, sex, weight, height, previous fracture, RA, glucocorticoid, alendronate use, and CCI, and self-reported known fall injury |
| Dobnig [28]  | NA                 | NA                       | antidiabetic drugs prescribed, or were found to have glycosylated HbA1c levels of more than 5.9%                                                                                                                                                                                                                                                                                                                                                                                                                                                                                                                                                                                                                                                                                                                                                    | Age and weight                                                                                                                 |
| H-EPESE [29] | 42.1               | NA                       | Physician diagnosis                                                                                                                                                                                                                                                                                                                                                                                                                                                                                                                                                                                                                                                                                                                                                                                                                                 | Age, gender, BMI, ever smoked, previous stroke, lower extremity functional ability, and distance vision                        |
| IWHS [30]    | 15.0               | 26.9                     | Self-reported                                                                                                                                                                                                                                                                                                                                                                                                                                                                                                                                                                                                                                                                                                                                                                                                                                       | Age, smoking, estrogen use, BMI, and WTHR                                                                                      |

1  
2  
3  
4  
5  
6  
7  
8  
9  
10  
11  
12  
13  
14  
15  
16  
17  
18  
19  
20  
21  
22

|                                   |      |      |                                                                                                                                                                                                                                                                                                                                                                                                                                                                                          |                                                                                                                              |
|-----------------------------------|------|------|------------------------------------------------------------------------------------------------------------------------------------------------------------------------------------------------------------------------------------------------------------------------------------------------------------------------------------------------------------------------------------------------------------------------------------------------------------------------------------------|------------------------------------------------------------------------------------------------------------------------------|
| SCI-DC [31]                       | NA   | NA   | We defined type 1 diabetes on the basis of the type of diabetes assigned in the database with the additional requirement that the prescription history did not contradict this (ie, no evidence of lengthy period of diabetes before insulin and no coprescribing of nonmetformin oral diabetes drugs). Type 2 diabetes was defined as either a recorded diagnosis of type 2 diabetes or a diagnosis of type 1 diabetes that was contradicted by clinical history and prescription data. | Age, calendar year, SIMD, and for the overall estimate, an SIMD-age interaction                                              |
| SIDIAP [32]                       | 15.6 | 29.3 | T2DM diagnosis (ICD-10 codes E11.0, E11.1, E11.2, E11.3, E11.4, E11.5, E11.6, E11.7, E11.8, and E11.9)                                                                                                                                                                                                                                                                                                                                                                                   | BMI, previous fracture, oral corticoids                                                                                      |
| THIN [33]                         | 26.7 | 25.5 | Exposure to type 1 diabetes was defined by the presence of one or more Read codes specific for type 1 diabetes and the absence of a code specific for type 2 diabetes                                                                                                                                                                                                                                                                                                                    | Exposure to steroid medication, history of prior fracture, and presence of chronic kidney disease                            |
| NHS [34]                          | 17.9 | 26.0 | When women reported that diabetes had been diagnosed by a physician, confirmation was based on responses to a supplementary questionnaire about complications, diagnostic tests, and treatments                                                                                                                                                                                                                                                                                          | Age, BMI, physical activity, menopausal status and estrogen use, smoking and daily intake of calcium, vitamin D, and protein |
| The Rotterdam Study [35]          | 25.0 | 26.4 | Diabetes was defined as antidiabetic medication use or a preload or postload serum glucose level >11.1 mmol/L                                                                                                                                                                                                                                                                                                                                                                            | Age, sex, height, weight, and femoral neck BMD                                                                               |
| The Tromsø study [36]             | 37.0 | 25.5 | Medical records                                                                                                                                                                                                                                                                                                                                                                                                                                                                          | Age, BMI, smoking, and metabolic features                                                                                    |
| Swedish Inpatient Register [37]   | NA   | NA   | We used age <30 years at first hospitalization for diabetes (even if it preceded the start of cohort accrual) as an obligatory criterion                                                                                                                                                                                                                                                                                                                                                 | Age, sex, and calendar-period-matched general population from the entire Swedish inpatient registry                          |
| The Blue Mountains Eye Study [38] | NA   | NA   | Diabetes was diagnosed from a self-reported positive physician-diagnosis                                                                                                                                                                                                                                                                                                                                                                                                                 | Age, sex, and BMI                                                                                                            |
| Singapore Chinese                 | 19.4 | NA   | Physician diagnosed                                                                                                                                                                                                                                                                                                                                                                                                                                                                      | Age at recruitment, sex, year of                                                                                             |

1  
2  
3  
4  
5  
6  
7  
8  
9  
10  
11  
12  
13  
14  
15  
16  
17  
18  
19  
20  
21  
22  
23  
24  
25  
26  
27  
28  
29  
30  
31  
32  
33  
34  
35  
36  
37  
38  
39  
40  
41  
42  
43  
44  
45  
46  
47  
48  
49  
50  
51  
52  
53  
54  
55  
56  
57  
58  
59  
60

|                                   |      |    |                                                                                                                                  |                                                                                                                                                                                                                                                                                   |
|-----------------------------------|------|----|----------------------------------------------------------------------------------------------------------------------------------|-----------------------------------------------------------------------------------------------------------------------------------------------------------------------------------------------------------------------------------------------------------------------------------|
| Health Study [39]                 |      |    |                                                                                                                                  | recruitment, dialect group, level of education, weekly vigorous work or strenuous sports, BMI, smoking status, total calcium intake from food and supplement, total soy isoflavone intake, and self-reported stroke                                                               |
| Meyer [40]                        | 16.9 | NA | Nonfasting blood sample                                                                                                          | Age, height, BMI, physical activity, stroke, receipt of a disability pension, marriage, and smoking                                                                                                                                                                               |
| Lipscombe [41]                    | NA   | NA | Ontario Diabetes Database                                                                                                        | Age, chronic unstable disease, prior stroke, visual impairment, neuropathy, amputation, treatment with nitrates, statins, thiazides, estrogen, anticonvulsants, inhaled corticosteroids, and medications increasing falling risk, and history of BMD test                         |
| Melton [42]                       | NA   | NA | Community medical records                                                                                                        | Age, BMI, calcaneal BMD, or a host of other osteoporosis risk factors                                                                                                                                                                                                             |
| Nord-Trøndelag Health Survey [43] | 30.4 | NA | blood sample drawn for analysis of HbA1                                                                                          | Age, BMI and daily smoking                                                                                                                                                                                                                                                        |
| Malmö Preventive Project [44]     | NA   | NA | Fasting blood glucose                                                                                                            | Age, BMI, DBP, resting pulse rate, triglyceride level, gammaglutamyltransferase, smoking, poor self-rated health, sedimentation rate for women, and cholesterol or creatinine for men                                                                                             |
| WHI [45]                          | 6.2  | NA | Participants with type 1 diabetes, defined as those diagnosed before age 20 yr or who were ever hospitalized for a diabetic coma | Age; ethnicity; weight; height; time-dependent history of falls; previous fracture; history of osteoporosis; trouble seeing at baseline; alcohol or tobacco use; calcium and vitamin D intake; exercise; bisphosphonate, estrogen, steroid, insulin, SERM, or thyroid hormone use |
| Leslie [46]                       | NA   | NA | two physician office visits or a single hospitalization with a diagnosis of diabetes (ICD-9-CM code 250)                         | Age, sex, income quintile, area of residence and ethnicity                                                                                                                                                                                                                        |

1  
2  
3  
4  
5  
6  
7  
8  
9  
10  
11  
12  
13  
14  
15  
16  
17  
18  
19  
20  
21  
22  
23  
24  
25  
26  
27  
28  
29  
30  
31  
32  
33  
34  
35  
36  
37  
38  
39  
40  
41  
42  
43  
44  
45  
46  
47  
48  
49  
50  
51  
52  
53  
54  
55  
56  
57  
58  
59  
60

|               |    |      |                                                                                                                       |                                                                                                                                                                                                                                                 |
|---------------|----|------|-----------------------------------------------------------------------------------------------------------------------|-------------------------------------------------------------------------------------------------------------------------------------------------------------------------------------------------------------------------------------------------|
| Majumdar [47] | NA | 27.1 | coded using the ICD-9-CM prior to 2004 and International Classification of Diseases, 10th revision, Canada thereafter | FRAX scores, burden of comorbidity, falls, prescription osteoporosis treatments, and insulin therapy                                                                                                                                            |
| SOF [48]      | NA | 26.2 | Interview                                                                                                             | Age, BMI, calcaneal BMD, height, height loss since age 25, contrast sensitivity, walking speed, consumed alcohol in past year, resting pulse, mother fractured hip, on feet < 4 h a day, use of long-acting benzodiazepines, and calcium intake |
| Chen [49]     | NA | NA   | diabetes-related diagnosis (ICD-9 250 or A code 181)                                                                  | Age as a continuous variable, geographic area, and urbanization status                                                                                                                                                                          |

\*BMI: body mass index; AAI: ankle-armindex; NA: not available; RA: rheumatoid arthritis; CCI: Charlson comorbidity index; WTHR: waist-to-hip ratio; SIMD: Scottish Index of Multiple Deprivation

S1 Table. Quality scores of prospective cohort studies using Newcastle-Ottawa Scale.

| Study                             | Selection                                |                                     |                             |                                                               | Comparability                                        |                       | Outcome                     |                         | NOS           |
|-----------------------------------|------------------------------------------|-------------------------------------|-----------------------------|---------------------------------------------------------------|------------------------------------------------------|-----------------------|-----------------------------|-------------------------|---------------|
|                                   | Representativeness of the exposed cohort | Selection of the non exposed cohort | Ascertainment of DM disease | Demonstration that outcomes was not present at start of study | Comparability on the basis of the design or analysis | Assessment of outcome | Adequate follow-up duration | Adequate follow-up rate | Overall score |
| CHS [25]                          | 0                                        | 1                                   | 1                           | 1                                                             | 2                                                    | 1                     | 1                           | 1                       | 8             |
| Jung [26]                         | 0                                        | 1                                   | 1                           | 1                                                             | 2                                                    | 1                     | 0                           | 1                       | 7             |
| FRAILCO [27]                      | 1                                        | 1                                   | 1                           | 1                                                             | 2                                                    | 1                     | 0                           | 1                       | 8             |
| Dobnig [28]                       | 0                                        | 1                                   | 1                           | 1                                                             | 1                                                    | 1                     | 0                           | 1                       | 6             |
| H-EPESE [29]                      | 0                                        | 1                                   | 1                           | 1                                                             | 2                                                    | 1                     | 0                           | 1                       | 7             |
| IWHS [30]                         | 1                                        | 1                                   | 1                           | 1                                                             | 2                                                    | 1                     | 1                           | 1                       | 9             |
| SCI-DC [31]                       | 1                                        | 1                                   | 1                           | 1                                                             | 2                                                    | 1                     | 0                           | 0                       | 7             |
| SIDIAP [32]                       | 1                                        | 1                                   | 1                           | 1                                                             | 2                                                    | 1                     | 0                           | 1                       | 8             |
| THIN [33]                         | 1                                        | 1                                   | 1                           | 1                                                             | 1                                                    | 1                     | 0                           | 0                       | 6             |
| NHS [34]                          | 1                                        | 1                                   | 1                           | 1                                                             | 2                                                    | 1                     | 1                           | 1                       | 9             |
| The Rotterdam Study [35]          | 0                                        | 1                                   | 1                           | 1                                                             | 2                                                    | 1                     | 1                           | 1                       | 8             |
| The Tromsø study [36]             | 1                                        | 1                                   | 1                           | 1                                                             | 2                                                    | 1                     | 0                           | 1                       | 8             |
| Swedish Inpatient Register [37]   | 0                                        | 1                                   | 1                           | 1                                                             | 1                                                    | 1                     | 1                           | 0                       | 6             |
| The Blue Mountains Eye Study [38] | 0                                        | 1                                   | 1                           | 1                                                             | 2                                                    | 1                     | 0                           | 1                       | 7             |
| Singapore Chinese                 | 1                                        | 1                                   | 1                           | 1                                                             | 2                                                    | 1                     | 1                           | 1                       | 9             |

1  
2  
3  
4

Health Study [39]

|                                            |   |   |   |   |   |   |   |   |   |
|--------------------------------------------|---|---|---|---|---|---|---|---|---|
| 6 Meyer [40]                               | 1 | 1 | 1 | 1 | 2 | 1 | 1 | 1 | 9 |
| 7 Lipscombe [41]                           | 1 | 1 | 1 | 1 | 1 | 1 | 0 | 1 | 7 |
| 9 Melton [42]                              | 0 | 1 | 1 | 1 | 1 | 1 | 0 | 1 | 6 |
| 10 Nord-Trøndelag<br>11 Health Survey [43] | 1 | 1 | 1 | 1 | 2 | 1 | 1 | 1 | 9 |
| 12 Malmö Preventive<br>14 Project [44]     | 1 | 1 | 1 | 1 | 2 | 1 | 0 | 0 | 7 |
| 15 WHI [45]                                | 1 | 1 | 1 | 1 | 2 | 1 | 0 | 1 | 8 |
| 17 Leslie [46]                             | 1 | 1 | 1 | 1 | 2 | 1 | 1 | 1 | 9 |
| 18 Majumdar [47]                           | 1 | 1 | 1 | 1 | 2 | 1 | 0 | 1 | 8 |
| 19 SOF [48]                                | 1 | 1 | 1 | 1 | 2 | 1 | 1 | 1 | 9 |
| 21 Chen [49]                               | 1 | 1 | 1 | 1 | 2 | 1 | 0 | 1 | 8 |

22  
23  
24  
25  
26  
27  
28  
29  
30  
31  
32  
33  
34  
35  
36  
37  
38  
39  
40  
41  
42  
43  
44  
45  
46

For peer review only

S2 Table. Sensitivity analysis for total fractures

| Excluding study              | RR and 95% CI    | P value | Heterogeneity (%) | P value for heterogeneity |
|------------------------------|------------------|---------|-------------------|---------------------------|
| Jung                         | 1.32 (1.17-1.50) | <0.001  | 97.4              | <0.001                    |
| FRAILCO                      | 1.36 (1.17-1.58) | <0.001  | 96.9              | <0.001                    |
| THIN                         | 1.25 (1.14-1.36) | <0.001  | 91.7              | <0.001                    |
| The Rotterdam Study          | 1.33 (1.17-1.51) | <0.001  | 97.4              | <0.001                    |
| The Tromsø study             | 1.31 (1.16-1.46) | <0.001  | 97.4              | <0.001                    |
| The Blue Mountains Eye Study | 1.29 (1.14-1.46) | <0.001  | 97.4              | <0.001                    |
| Melton                       | 1.32 (1.16-1.51) | <0.001  | 97.2              | <0.001                    |
| Malmö Preventive Project     | 1.26 (1.12-1.42) | <0.001  | 97.2              | <0.001                    |
| WHI                          | 1.32 (1.17-1.50) | <0.001  | 97.4              | <0.001                    |
| Leslie                       | 1.36 (1.19-1.56) | <0.001  | 96.6              | <0.001                    |
| Majumdar                     | 1.34 (1.18-1.53) | <0.001  | 97.4              | <0.001                    |
| SOF                          | 1.32 (1.16-1.49) | <0.001  | 97.4              | <0.001                    |

S3 Table. Sensitivity analysis for hip fracture

| Excluding study                | RR and 95% CI    | P value | Heterogeneity (%) | P value for heterogeneity |
|--------------------------------|------------------|---------|-------------------|---------------------------|
| CHS                            | 1.81 (1.58-2.06) | <0.001  | 98.1              | <0.001                    |
| Jung                           | 1.78 (1.57-2.03) | <0.001  | 98.1              | <0.001                    |
| FRAILCO                        | 1.83 (1.59-2.10) | <0.001  | 98.0              | <0.001                    |
| Dobnig                         | 1.81 (1.58-2.06) | <0.001  | 98.1              | <0.001                    |
| H-EPESE                        | 1.78 (1.56-2.03) | <0.001  | 98.1              | <0.001                    |
| IWHS                           | 1.76 (1.54-2.00) | <0.001  | 98.1              | <0.001                    |
| SCI-DC                         | 1.83 (1.59-2.11) | <0.001  | 97.9              | <0.001                    |
| SIDIAP                         | 1.81 (1.58-2.06) | <0.001  | 98.1              | <0.001                    |
| THIN                           | 1.73 (1.52-1.97) | <0.001  | 97.9              | <0.001                    |
| NHS                            | 1.74 (1.53-1.98) | <0.001  | 98.0              | <0.001                    |
| The Rotterdam Study            | 1.80 (1.58-2.05) | <0.001  | 98.1              | <0.001                    |
| The Tromsø study               | 1.75 (1.53-1.99) | <0.001  | 98.1              | <0.001                    |
| Swedish Inpatient Register     | 1.61 (1.44-1.80) | <0.001  | 97.1              | <0.001                    |
| The Blue Mountains Eye Study   | 1.77 (1.55-2.01) | <0.001  | 98.1              | <0.001                    |
| Singapore Chinese Health Study | 1.76 (1.54-2.00) | <0.001  | 98.0              | <0.001                    |
| Meyer                          | 1.72 (1.51-1.95) | <0.001  | 98.1              | <0.001                    |
| Lipscombe                      | 1.83 (1.58-2.13) | <0.001  | 97.9              | <0.001                    |
| Melton                         | 1.81 (1.59-2.07) | <0.001  | 98.1              | <0.001                    |
| Nord-Trøndelag Health Survey   | 1.78 (1.56-2.03) | <0.001  | 98.1              | <0.001                    |
| Malmö Preventive Project       | 1.70 (1.50-1.93) | <0.001  | 98.0              | <0.001                    |
| WHI                            | 1.77 (1.56-2.02) | <0.001  | 98.1              | <0.001                    |
| Leslie                         | 1.82 (1.59-2.09) | <0.001  | 98.1              | <0.001                    |
| Majumdar                       | 1.78 (1.56-2.04) | <0.001  | 98.1              | <0.001                    |
| SOF                            | 1.78 (1.56-2.02) | <0.001  | 98.1              | <0.001                    |
| Chen                           | 1.79 (1.56-2.05) | <0.001  | 97.5              | <0.001                    |



S4 Table. Sensitivity analysis for distal forearm fracture.

| Excluding study              | RR and 95% CI    | P value | Heterogeneity (%) | P value for heterogeneity |
|------------------------------|------------------|---------|-------------------|---------------------------|
| Jung                         | 1.04 (0.87-1.23) | 0.687   | 37.7              | 0.141                     |
| FRAILCO                      | 1.13 (0.96-1.34) | 0.139   | 0.0               | 0.928                     |
| Dobnig                       | 1.02 (0.86-1.19) | 0.849   | 33.1              | 0.176                     |
| The Rotterdam Study          | 0.97 (0.84-1.12) | 0.671   | 17.3              | 0.298                     |
| The Blue Mountains Eye Study | 1.00 (0.87-1.16) | 0.965   | 26.8              | 0.224                     |
| Melton                       | 1.02 (0.85-1.22) | 0.846   | 27.3              | 0.220                     |
| WHI                          | 1.01 (0.86-1.18) | 0.942   | 29.8              | 0.201                     |
| SOF                          | 1.04 (0.86-1.24) | 0.700   | 35.4              | 0.158                     |

S5 Table. Sensitivity analysis for upper arm fracture

| <b>Excluding study</b>       | <b>RR and 95% CI</b> | <b>P value</b> | <b>Heterogeneity (%)</b> | <b>P value for heterogeneity</b> |
|------------------------------|----------------------|----------------|--------------------------|----------------------------------|
| FRAILCO                      | 1.59 (0.89-2.83)     | 0.116          | 85.1                     | <0.001                           |
| The Blue Mountains Eye Study | 1.31 (0.95-1.82)     | 0.100          | 83.2                     | <0.001                           |
| Melton                       | 1.40 (0.86-2.30)     | 0.178          | 83.3                     | <0.001                           |
| Malmö Preventive Project     | 1.73 (1.21-2.46)     | 0.003          | 82.8                     | <0.001                           |
| WHI                          | 1.56 (1.06-2.29)     | 0.025          | 87.6                     | <0.001                           |
| SOF                          | 1.36 (0.90-2.06)     | 0.142          | 86.2                     | <0.001                           |

For peer review only

S6 Table. Sensitivity analysis for ankle fracture

| <b>Excluding study</b>   | <b>RR and 95% CI</b> | <b>P value</b> | <b>Heterogeneity (%)</b> | <b>P value for heterogeneity</b> |
|--------------------------|----------------------|----------------|--------------------------|----------------------------------|
| FRAILCO                  | 1.42 (1.05-1.90)     | 0.021          | 2.2                      | 0.360                            |
| Malmö Preventive Project | 1.22 (1.08-1.38)     | 0.002          | 0.0                      | 0.958                            |
| WHI                      | 1.30 (1.03-1.63)     | 0.026          | 31.2                     | 0.234                            |
| SOF                      | 1.33 (1.02-1.73)     | 0.034          | 32.2                     | 0.229                            |

For peer review only

S7 Table. Sensitivity analysis for vertebrae fracture

| <b>Excluding study</b>   | <b>RR and 95% CI</b> | <b>P value</b> | <b>Heterogeneity (%)</b> | <b>P value for heterogeneity</b> |
|--------------------------|----------------------|----------------|--------------------------|----------------------------------|
| Jung                     | 1.74 (0.82-3.69)     | 0.148          | 96.5                     | <0.001                           |
| Dobnig                   | 1.72 (0.84-3.52)     | 0.140          | 93.5                     | <0.001                           |
| Melton                   | 1.20 (0.89-1.63)     | 0.233          | 52.6                     | 0.077                            |
| Malmö Preventive Project | 1.44 (0.65-3.17)     | 0.370          | 97.1                     | <0.001                           |
| WHI                      | 1.56 (0.72-3.35)     | 0.258          | 97.0                     | <0.001                           |
| SOF                      | 1.67 (0.77-3.63)     | 0.194          | 96.6                     | <0.001                           |

For peer review only

## Searching strategy in PubMed:

| PubMed | Search strategy                                                                                                 |
|--------|-----------------------------------------------------------------------------------------------------------------|
| #1     | "Diabetes Mellitus"[Mesh]                                                                                       |
| #2     | diabetes OR diabetes mellitus OR type 2 diabetes mellitus OR type 1 diabetes mellitus OR glycuerosis            |
| #3     | DM OR T2DM OR T1DM                                                                                              |
| #4     | #1 OR #2 OR #3                                                                                                  |
| #5     | "fracture"[Mesh]                                                                                                |
| #6     | fractures, spontaneous OR hip fractures OR osteoporotic fractures OR fractures, compression OR spinal fractures |
| #7     | #5 OR #6                                                                                                        |
| #8     | epidemiologic study OR cohort                                                                                   |
| #9     | #4 AND #7 AND #8                                                                                                |

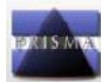

# PRISMA 2009 Checklist

| Section/topic                      | #  | Checklist item                                                                                                                                                                                                                                                                                              | Reported on page # |
|------------------------------------|----|-------------------------------------------------------------------------------------------------------------------------------------------------------------------------------------------------------------------------------------------------------------------------------------------------------------|--------------------|
| <b>TITLE</b>                       |    |                                                                                                                                                                                                                                                                                                             |                    |
| Title                              | 1  | Identify the report as a systematic review, meta-analysis, or both.                                                                                                                                                                                                                                         | 1                  |
| <b>ABSTRACT</b>                    |    |                                                                                                                                                                                                                                                                                                             |                    |
| Structured summary                 | 2  | Provide a structured summary including, as applicable: background; objectives; data sources; study eligibility criteria, participants, and interventions; study appraisal and synthesis methods; results; limitations; conclusions and implications of key findings; systematic review registration number. | 2                  |
| <b>INTRODUCTION</b>                |    |                                                                                                                                                                                                                                                                                                             |                    |
| Rationale                          | 3  | Describe the rationale for the review in the context of what is already known.                                                                                                                                                                                                                              | 4                  |
| Objectives                         | 4  | Provide an explicit statement of questions being addressed with reference to participants, interventions, comparisons, outcomes, and study design (PICOS).                                                                                                                                                  | 4-5                |
| <b>METHODS</b>                     |    |                                                                                                                                                                                                                                                                                                             |                    |
| Protocol and registration          | 5  | Indicate if a review protocol exists, if and where it can be accessed (e.g., Web address), and, if available, provide registration information including registration number.                                                                                                                               | None               |
| Eligibility criteria               | 6  | Specify study characteristics (e.g., PICOS, length of follow-up) and report characteristics (e.g., years considered, language, publication status) used as criteria for eligibility, giving rationale.                                                                                                      | 5                  |
| Information sources                | 7  | Describe all information sources (e.g., databases with dates of coverage, contact with study authors to identify additional studies) in the search and date last searched.                                                                                                                                  | 5                  |
| Search                             | 8  | Present full electronic search strategy for at least one database, including any limits used, such that it could be repeated.                                                                                                                                                                               | 5                  |
| Study selection                    | 9  | State the process for selecting studies (i.e., screening, eligibility, included in systematic review, and, if applicable, included in the meta-analysis).                                                                                                                                                   | 5                  |
| Data collection process            | 10 | Describe method of data extraction from reports (e.g., piloted forms, independently, in duplicate) and any processes for obtaining and confirming data from investigators.                                                                                                                                  | 5-6                |
| Data items                         | 11 | List and define all variables for which data were sought (e.g., PICOS, funding sources) and any assumptions and simplifications made.                                                                                                                                                                       | 6                  |
| Risk of bias in individual studies | 12 | Describe methods used for assessing risk of bias of individual studies (including specification of whether this was done at the study or outcome level), and how this information is to be used in any data synthesis.                                                                                      | 6                  |
| Summary measures                   | 13 | State the principal summary measures (e.g., risk ratio, difference in means).                                                                                                                                                                                                                               | 6                  |
| Synthesis of results               | 14 | Describe the methods of handling data and combining results of studies, if done, including measures of consistency (e.g., $I^2$ ) for each meta-analysis.                                                                                                                                                   | 6                  |



# PRISMA 2009 Checklist

| Section/topic                 | #  | Checklist item                                                                                                                                                                                           | Reported on page # |
|-------------------------------|----|----------------------------------------------------------------------------------------------------------------------------------------------------------------------------------------------------------|--------------------|
| Risk of bias across studies   | 15 | Specify any assessment of risk of bias that may affect the cumulative evidence (e.g., publication bias, selective reporting within studies).                                                             | 6                  |
| Additional analyses           | 16 | Describe methods of additional analyses (e.g., sensitivity or subgroup analyses, meta-regression), if done, indicating which were pre-specified.                                                         | 6                  |
| <b>RESULTS</b>                |    |                                                                                                                                                                                                          |                    |
| Study selection               | 17 | Give numbers of studies screened, assessed for eligibility, and included in the review, with reasons for exclusions at each stage, ideally with a flow diagram.                                          | 7                  |
| Study characteristics         | 18 | For each study, present characteristics for which data were extracted (e.g., study size, PICOS, follow-up period) and provide the citations.                                                             | 12                 |
| Risk of bias within studies   | 19 | Present data on risk of bias of each study and, if available, any outcome level assessment (see item 12).                                                                                                | 12                 |
| Results of individual studies | 20 | For all outcomes considered (benefits or harms), present, for each study: (a) simple summary data for each intervention group (b) effect estimates and confidence intervals, ideally with a forest plot. | 12-18              |
| Synthesis of results          | 21 | Present results of each meta-analysis done, including confidence intervals and measures of consistency.                                                                                                  | 12-18              |
| Risk of bias across studies   | 22 | Present results of any assessment of risk of bias across studies (see Item 15).                                                                                                                          | 12-18              |
| Additional analysis           | 23 | Give results of additional analyses, if done (e.g., sensitivity or subgroup analyses, meta-regression [see Item 16]).                                                                                    | 12-18              |
| <b>DISCUSSION</b>             |    |                                                                                                                                                                                                          |                    |
| Summary of evidence           | 24 | Summarize the main findings including the strength of evidence for each main outcome; consider their relevance to key groups (e.g., healthcare providers, users, and policy makers).                     | 18-20              |
| Limitations                   | 25 | Discuss limitations at study and outcome level (e.g., risk of bias), and at review-level (e.g., incomplete retrieval of identified research, reporting bias).                                            | 20                 |
| Conclusions                   | 26 | Provide a general interpretation of the results in the context of other evidence, and implications for future research.                                                                                  | 20                 |
| <b>FUNDING</b>                |    |                                                                                                                                                                                                          |                    |
| Funding                       | 27 | Describe sources of funding for the systematic review and other support (e.g., supply of data); role of funders for the systematic review.                                                               | 21                 |

From: Moher D, Liberati A, Tetzlaff J, Altman DG, The PRISMA Group (2009). Preferred Reporting Items for Systematic Reviews and Meta-Analyses: The PRISMA Statement. PLoS Med 6(6): e1000097. doi:10.1371/journal.pmed1000097

For more information, visit: [www.prisma-statement.org](http://www.prisma-statement.org).

# BMJ Open

## Diabetes mellitus and the risk of fractures at specific sites: a meta-analysis

|                                 |                                                                                                                                                                                                                                                                                                                                                                                                                         |
|---------------------------------|-------------------------------------------------------------------------------------------------------------------------------------------------------------------------------------------------------------------------------------------------------------------------------------------------------------------------------------------------------------------------------------------------------------------------|
| Journal:                        | <i>BMJ Open</i>                                                                                                                                                                                                                                                                                                                                                                                                         |
| Manuscript ID                   | bmjopen-2018-024067.R2                                                                                                                                                                                                                                                                                                                                                                                                  |
| Article Type:                   | Research                                                                                                                                                                                                                                                                                                                                                                                                                |
| Date Submitted by the Author:   | 05-Oct-2018                                                                                                                                                                                                                                                                                                                                                                                                             |
| Complete List of Authors:       | wang, hao; the first affiliated hospital of Dalian Medical University, Department of endocrinology<br>Ba, Ying; the first affiliated hospital of Dalian Medical University, Department of endocrinology<br>Xing, Qian; the first affiliated hospital of Dalian Medical University, Department of endocrinology<br>Du, Jianling; the first affiliated hospital of Dalian Medical University, Department of endocrinology |
| <b>Primary Subject Heading</b>: | Diabetes and endocrinology                                                                                                                                                                                                                                                                                                                                                                                              |
| Secondary Subject Heading:      | Diabetes and endocrinology, Public health                                                                                                                                                                                                                                                                                                                                                                               |
| Keywords:                       | diabetes mellitus, fracture, meta-analysis                                                                                                                                                                                                                                                                                                                                                                              |
|                                 |                                                                                                                                                                                                                                                                                                                                                                                                                         |

SCHOLARONE™  
Manuscripts



1  
2  
3  
4 **Diabetes mellitus and the risk of fractures at specific sites: a meta-**  
5  
6  
7 **analysis**  
8  
9

10 Hao Wang<sup>1\*</sup>, Ying Ba<sup>1</sup>, Qian Xing<sup>1</sup>, Jian-Ling Du<sup>1</sup>  
11

12 <sup>1</sup>Department of Endocrinology, the first affiliated Hospital of Dalian Medical  
13 University, Dalian, Liaoning province, China, 116000  
14

15  
16  
17 Hao Wang and Jian-Ling Du contributed equally to this paper.  
18  
19

20  
21  
22  
23 \*Corresponding author: Hao Wang, Department of Endocrinology, the first affiliated  
24 Hospital of Dalian Medical University, Dalian, Liaoning province, China, 116000. E-  
25 mail: [wanghaodl@126.com](mailto:wanghaodl@126.com)  
26  
27  
28  
29

30  
31  
32 **Running title:** DM and fractures  
33

34  
35 **Email:**  
36

37 Hao Wang: [wanghaodl@126.com](mailto:wanghaodl@126.com);  
38

39 Ying Ba: [baying126@126.com](mailto:baying126@126.com);  
40

41 Qian Xing: [xingqiandl@163.com](mailto:xingqiandl@163.com);  
42

43 Jian-Ling Du: [dujianling63@163.com](mailto:dujianling63@163.com)  
44  
45  
46  
47  
48  
49  
50  
51  
52  
53  
54  
55

56 **Word count:** 3026  
57  
58  
59  
60

1  
2  
3  
4  
5  
6  
7  
8  
9  
10  
11  
12  
13  
14  
15  
16  
17  
18  
19  
20  
21  
22  
23  
24  
25  
26  
27  
28  
29  
30  
31  
32  
33  
34  
35  
36  
37  
38  
39  
40  
41  
42  
43  
44  
45  
46  
47  
48  
49  
50  
51  
52  
53  
54  
55  
56  
57  
58  
59  
60

For peer review only

## Abstract

**Objective:** Diabetes mellitus (DM) is associated with an increased fracture risk; however, the impact of DM and subsequent fracture at different sites and the associations according to patient characteristics remain unknown.

**Design:** Meta-analysis

**Data Sources:** The PubMed, EMBASE, and Cochrane Library databases were searched from inception to March 2018.

**Eligibility Criteria:** We included prospective and retrospective cohort studies on the associations of DM and subsequent fracture risk at different sites.

**Data extraction and synthesis:** Two authors independently extracted data and assessed the study quality. Relative risks (RRs) with 95% confidence intervals (CIs) were calculated using a random-effects model, and the heterogeneity across the included studies was evaluated using  $I^2$  and Q statistics.

**Results:** Overall, DM was associated with an increased risk of total (RR: 1.32; 95% CI: 1.17–1.48;  $P<0.001$ ), hip (RR: 1.77; 95% CI: 1.56–2.02;  $P<0.001$ ), upper arm (RR: 1.47; 95% CI: 1.02–2.10;  $P=0.037$ ), and ankle fractures (RR: 1.24; 95% CI: 1.10–1.40;  $P<0.001$ ), whereas DM had no significant impact on the incidence of distal forearm (RR: 1.02; 95% CI: 0.88–1.19;  $P=0.809$ ) and vertebral fractures (RR: 1.56; 95% CI: 0.78–3.12;  $P=0.209$ ). RR ratios suggested that compared with type 2 DM (T2DM)

1  
2  
3  
4 patients, type 1 DM (T1DM) patients had greater risk of total (RR ratio: 1.24; 95% CI:  
5  
6 1.08–1.41; P=0.002), hip (RR ratio: 3.43; 95% CI: 2.27–5.17; P<0.001), and ankle  
7  
8 fractures (RR ratio: 1.71; 95% CI: 1.06–2.78; P=0.029). Although no other significant  
9  
10 differences were observed between subgroups, the association of DM with upper arm  
11  
12 or ankle, vertebrae, and total fracture differed according to sex, study design, and  
13  
14 country, respectively.  
15  
16  
17  
18  
19

20  
21 **Conclusions:** DM patients had greater risks of total, hip, upper arm, and ankle fractures,  
22  
23 with T1DM having a more harmful effect than T2DM.  
24  
25  
26  
27  
28  
29

30  
31 **Keywords:** diabetes mellitus; fracture; meta-analysis  
32  
33  
34  
35  
36  
37  
38  
39  
40

#### 41 **Article Summary:**

42  
43  
44 Strengths and limitations of this study:

45  
46  
47 (1) The current study included articles that were based on cohort study designs, which  
48  
49 could eliminate various confounding factors.  
50  
51

52  
53  
54 (2) A large sample size of patients was included; thus, our findings are potentially more  
55  
56 robust than those of any individual study.  
57  
58  
59  
60

1  
2  
3  
4 (3) DM diagnosis in individual studies was not consistent, which might have introduced  
5  
6  
7 confounding to the representative DM cohort.  
8  
9

10 (4) The adjusted models differed across the included studies, and the factors in these  
11  
12  
13 models might have played an important role in the development of fractures.  
14  
15  
16  
17  
18  
19  
20  
21  
22  
23  
24  
25  
26  
27  
28  
29  
30  
31  
32  
33  
34  
35  
36  
37  
38  
39  
40  
41  
42  
43  
44  
45  
46  
47  
48  
49  
50  
51  
52  
53  
54  
55  
56  
57  
58  
59  
60

For peer review only

## INTRODUCTION

Diabetes mellitus (DM) is considered a major global public health problem that is likely to be among the five leading causes of disease burden, with an estimated global prevalence of 4.4%, by 2030.[1] Age is an important factor, with the majority of DM patients aged >65 years.[2] Previous studies have confirmed the harmful impact of DM on the risk of vascular outcomes,[3,4] cancer at different sites,[5] and renal dysfunction.[6] Due to DM, patients might have altered calcium metabolism,[7] increased bone turnover,[8] and reduced bone mineral density (BMD);[9] which in turn may influence the risk of fractures in DM patients. However, previous meta-analyses reported different strengths of association between DM and the risk of fractures in type 1 and type 2 DM (T1DM and T2DM, respectively),[10,11] which highlights the need to verify and evaluate the association between DM and fracture at other sites.

Previous studies have illustrated the association between clinical factors and the risk of fractures at different sites.[12,13] However, due to limited sample sizes, the associations in patients with specific characteristics were not determined, and thus, there is a need for further verification. Furthermore, clinicians and patients could benefit from the assessment of fracture risk in patients. Therefore, it is of critical importance that clinicians are able to identify DM patients and the risk of fracture at different sites in patients with specific characteristics, to implement preventive strategies in each of such subsets. Vestergaard conducted a meta-analysis based on 16

1  
2  
3  
4 observational studies and found that both T1DM and T2DM are associated with an  
5  
6 increased risk of hip fracture, and that BMD is increased in T2DM but decreased in  
7  
8 T1DM. However, fractures at other sites and differences according to country, sex, and  
9  
10 study design were not separately assessed.[10] Fan et al. indicated that DM patients  
11  
12 have a greater risk of hip fractures compared with non-DM individuals and that this  
13  
14 association was more pronounced in T1DM patients.[11] However, the stratified results  
15  
16 of individual studies should first be pooled using fixed-effect models, and the summary  
17  
18 results of the included studies should be calculated using random-effects models.  
19  
20 Furthermore, the associations between DM and the risk of fracture at other sites,  
21  
22 including total, distal forearm, upper arm, ankle, and vertebra, were not assessed.  
23  
24 Therefore, this study was conducted to determine whether the association between DM  
25  
26 and fracture at different sites differed according to patient characteristics.  
27  
28  
29  
30  
31  
32  
33  
34  
35  
36  
37  
38  
39  
40

## 41 **MATERIAL AND METHODS**

### 42 **Search strategy and inclusion criteria**

43  
44  
45 This meta-analysis was performed according to the Preferred Reporting Items for  
46  
47 Systematic Reviews and Meta-Analysis statement (Checklist S1).[14] The PubMed,  
48  
49 EMBASE, and Cochrane Library databases were searched for studies from their  
50  
51 inception to March 2018 using the following core search terms: (“diabetes” OR  
52  
53 “diabetes mellitus” OR “glycuresis”) AND (“fractures, spontaneous” OR “hip fractures”  
54  
55  
56  
57  
58  
59  
60

1  
2  
3  
4 OR “osteoporotic fractures” OR “fractures, compression” OR “spinal fractures” OR  
5  
6  
7 “fracture”) AND (“epidemiologic study” OR “cohort”). The details of the search  
8  
9  
10 strategy for PubMed are shown in Supplemental 1. We restricted the search to include  
11  
12 only studies published in English. Furthermore, manual searches of reference lists of  
13  
14 relevant studies were performed to identify additional eligible studies. The study topic,  
15  
16 design, exposure, and fractures at different sites were used to identify relevant studies.  
17  
18  
19  
20  
21 The literature search and study selection process were independently conducted by two  
22  
23 authors using a standardized approach. Any inconsistency was resolved by group  
24  
25 discussion until a consensus was reached. The study inclusion criteria are as follows:  
26  
27 (1) a prospective or retrospective cohort design; (2) participants with T1DM or T2DM;  
28  
29 and (3) report of the effect estimates of comparisons between DM and non-DM and the  
30  
31 risk of fracture at different sites. We excluded case-control studies due to various  
32  
33 confounding factors that could bias the results.  
34  
35  
36  
37  
38  
39  
40  
41  
42  
43  
44

#### 45 **Data collection and quality assessment**

46  
47  
48 Data extraction and quality assessment were conducted independently by two authors.  
49  
50  
51 The information was examined and adjudicated independently by an additional author  
52  
53 by referring to the original studies. The abstracted data included the first author or study  
54  
55 group’s name, publication year, country, study design, sample size, mean patient age,  
56  
57 percentage of men, number of DM patients, percentage of current smokers, mean body  
58  
59  
60



1  
2  
3  
4 mass index (BMI), follow-up duration, DM diagnosis, and adjusted factors. The  
5  
6  
7 outcome variable was abstracted using the effect estimate with corresponding 95%  
8  
9  
10 confidence intervals (CIs). If the study reported several multivariable adjusted effect  
11  
12  
13 estimates, the effect estimate was maximally adjusted to account for potential  
14  
15  
16 confounders. The Newcastle-Ottawa Scale (NOS), which has been validated by  
17  
18  
19 evaluating the quality of observational studies in meta-analyses, was used to evaluate  
20  
21  
22 the methodological quality.[15] The NOS was based on selection (four items with a  
23  
24  
25 total of four stars), comparability (one item with a total of two stars), and outcome  
26  
27  
28 (three items with a total of three stars), with a total of nine stars for assessment.

### 32 33 **Statistical analysis**

34  
35  
36 The association between DM and the subsequent risk of fractures at different sites was  
37  
38  
39 based on effect estimates and corresponding 95% CIs in each study. We first used the  
40  
41  
42 fixed-effect model to calculate the summary relative risk (RR) and 95% CI for the  
43  
44  
45 association between DM and fractures in individual studies.[16] We then combined the  
46  
47  
48 RRs of fracture risk in DM versus non-DM individuals using a random-effects  
49  
50  
51 model.[17] Heterogeneity among the included studies was assessed using  $I^2$  and  $Q$   
52  
53  
54 statistics; and  $P$  values  $<0.10$  were considered to indicate significant  
55  
56  
57 heterogeneity.[18,19] Sensitivity analyses were conducted by removing each individual  
58  
59  
60 study from the overall analysis.[20] Stratified analyses were conducted for total, hip,

1  
2  
3  
4 distal forearm, upper arm, ankle, and vertebral fractures based on country, DM type,  
5  
6 sex, and study design. The RR ratio and its 95% CI was estimated using specific RR  
7  
8 and 95% CI according to country, DM types, sex, and study design.[21,22] Funnel plot,  
9  
10 Egger,[23] and Begg[24] tests were used to evaluate publication bias for total fractures.  
11  
12  
13 P-values were 2-sided, and those <0.05 were considered statistically significant across  
14  
15 the included studies. The statistical analyses were conducted using STATA (version  
16  
17  
18 12.0; Stata Corporation, College Station, TX, USA).  
19  
20  
21  
22  
23  
24  
25  
26  
27

### 28 **Patient and public involvement**

29  
30 No patients were involved in the development of the research question, outcome  
31  
32 measures, design, study implementation, dissemination of the results of the research to  
33  
34 the study participants, or interpretation of the results.  
35  
36  
37  
38  
39  
40  
41  
42

## 43 **RESULTS**

### 44 **Search of published literature**

45  
46  
47 A total of 684 articles were identified from our electronic search, of which 602 were  
48  
49 excluded due to duplication, irrelevance, and other design issues. We retrieved the full  
50  
51 text for the remaining 59 studies and selected 25 cohort studies for the final analysis  
52  
53 after detailed evaluations.[25-49] The manual search of the reference lists of relevant  
54  
55  
56  
57  
58  
59  
60

reviews did not yield any new eligible studies. The results of the study selection process are shown in Fig 1, and the general characteristics of the included studies are presented in Table 1 and S1 Table.

Table 1. Baseline characteristic of studies included

| Study                    | Publication year | Country     | Study design | Sample size | Mean age (yr) | Per men (%) | Number of DM | Follow-up (yr) |
|--------------------------|------------------|-------------|--------------|-------------|---------------|-------------|--------------|----------------|
| CHS [25]                 | 2011             | US          | Pro          | 5641        | 72.8          | 42.0        | 1456         | 10.9           |
| Jung [26]                | 2012             | Korea       | Retro        | 2282        | 61.0          | 0.0         | 1268         | 7.0            |
| FRAILCO [27]             | 2016             | Sweden      | Pro          | 428305      | 80.8          | 42.4        | 84702        | 1.3            |
| Dobnig [28]              | 2006             | Australia   | Pro          | 1664        | >70.0         | 0.0         | 583          | 2.0            |
| H-EPESE [29]             | 2002             | US          | Pro          | 2884        | 71.8          | 42.1        | 690          | 7.0            |
| IWHS [30]                | 2001             | US          | Pro          | 32089       | 61.6          | 0.0         | 1729         | 9.6            |
| SCI-DC [31]              | 2014             | UK          | Retro        | 3801874     | 20.0-84.0     | NA          | 201874       | NA             |
| SIDIAP [32]              | 2015             | Spain       | Pro          | 171931      | 62.6          | 56.5        | 58483        | 2.6            |
| THIN [33]                | 2015             | UK          | Retro        | 334266      | 34.0          | 56.1        | 30394        | 5.7            |
| NHS [34]                 | 2006             | US          | Pro          | 109983      | 56.3          | 0.0         | 8640         | 20.0           |
| The Rotterdam Study [35] | 2013             | Netherlands | Pro          | 4135        | 68.4          | 40.6        | 420          | 12.2           |
| The Tromsø study [36]    | 2006             | Norway      | Pro          | 27159       | 47.0          | 47.7        | 455          | 6.0            |

|    |                    |      |           |       |        |           |      |        |          |
|----|--------------------|------|-----------|-------|--------|-----------|------|--------|----------|
| 1  |                    |      |           |       |        |           |      |        |          |
| 2  |                    |      |           |       |        |           |      |        |          |
| 3  |                    |      |           |       |        |           |      |        |          |
| 4  | Swedish Inpatient  | 2005 | Sweden    | Retro | 24605  | 20.7      | 51.0 | 24605  | 9.9      |
| 5  |                    |      |           |       |        |           |      |        |          |
| 6  | Register [37]      |      |           |       |        |           |      |        |          |
| 7  |                    |      |           |       |        |           |      |        |          |
| 8  |                    |      |           |       |        |           |      |        |          |
| 9  | The Blue Mountains | 2001 | Australia | Pro   | 3654   | 66.2      | 43.3 | 216    | 5.0      |
| 10 |                    |      |           |       |        |           |      |        |          |
| 11 | Eye Study [38]     |      |           |       |        |           |      |        |          |
| 12 |                    |      |           |       |        |           |      |        |          |
| 13 |                    |      |           |       |        |           |      |        |          |
| 14 | Singapore Chinese  | 2010 | Singapore | Pro   | 63257  | 56.4      | 44.3 | 5668   | 12.0     |
| 15 |                    |      |           |       |        |           |      |        |          |
| 16 | Health Study [39]  |      |           |       |        |           |      |        |          |
| 17 |                    |      |           |       |        |           |      |        |          |
| 18 | Meyer [40]         | 1993 | Norway    | Pro   | 52313  | 35.0-49.0 | 51.6 | 288    | 10.9     |
| 19 |                    |      |           |       |        |           |      |        |          |
| 20 |                    |      |           |       |        |           |      |        |          |
| 21 | Lipscombe [41]     | 2007 | Canada    | Retro | 598812 | >66.0     | 50.6 | 197412 | 6.1      |
| 22 |                    |      |           |       |        |           |      |        |          |
| 23 |                    |      |           |       |        |           |      |        |          |
| 24 | Melton [42]        | 2008 | US        | Retro | 1964   | 61.7      | 51.0 | 1964   | 11.8     |
| 25 |                    |      |           |       |        |           |      |        |          |
| 26 |                    |      |           |       |        |           |      |        |          |
| 27 | Nord-Trøndelag     | 1999 | Norway    | Pro   | 35444  | 50.0-74.0 | 47.5 | 1850   | 9.0      |
| 28 |                    |      |           |       |        |           |      |        |          |
| 29 | Health Survey [43] |      |           |       |        |           |      |        |          |
| 30 |                    |      |           |       |        |           |      |        |          |
| 31 | Malmö Preventive   | 2006 | Sweden    | Pro   | 33346  | 27.0-61.0 | 67.3 | 166    | 16.0 for |
| 32 |                    |      |           |       |        |           |      |        |          |
| 33 |                    |      |           |       |        |           |      |        |          |
| 34 | Project [44]       |      |           |       |        |           |      |        | men and  |
| 35 |                    |      |           |       |        |           |      |        |          |
| 36 |                    |      |           |       |        |           |      |        | 11.0 for |
| 37 |                    |      |           |       |        |           |      |        |          |
| 38 |                    |      |           |       |        |           |      |        | women    |
| 39 |                    |      |           |       |        |           |      |        |          |
| 40 | WHI [45]           | 2006 | US        | Pro   | 93676  | 63.4      | 0.0  | 5285   | 7.0      |
| 41 |                    |      |           |       |        |           |      |        |          |
| 42 |                    |      |           |       |        |           |      |        |          |
| 43 | Leslie [46]        | 2007 | Canada    | Retro | 318776 | 58.0      | 50.0 | 82094  | 10.0     |
| 44 |                    |      |           |       |        |           |      |        |          |
| 45 |                    |      |           |       |        |           |      |        |          |
| 46 | Majumdar [47]      | 2016 | Canada    | Retro | 57938  | 64.3      | 0.0  | 8840   | 7.2      |
| 47 |                    |      |           |       |        |           |      |        |          |
| 48 |                    |      |           |       |        |           |      |        |          |
| 49 | SOF [48]           | 2001 | US        | Pro   | 9754   | 71.0      | 0.0  | 657    | 9.4      |
| 50 |                    |      |           |       |        |           |      |        |          |
| 51 | Chen [49]          | 2008 | China     | Retro | 969820 | 60.0      | 47.0 | 484787 | 6.0      |
| 52 |                    |      |           |       |        |           |      |        |          |

\*Yr: year; Per: percentage; Pro: prospective; Retro: retrospective

## Study characteristics

1  
2  
3  
4 Of the 25 included studies, 16 used a prospective cohort design[25,27-30,32,34-36,38-  
5  
6 40,43-45,48] while the remaining 9 studies used a retrospective cohort  
7  
8 design.[26,31,33,37,41,42,46,47] The sample sizes ranged from 1,664 to 3,801,874;  
9  
10 while the number of DM patients ranged from 166 to 484,787. Twelve studies were  
11  
12 conducted in the US, Australia, or Canada;[25,28-30,34,38,41,42,45-48] 10 in  
13  
14 Europe;[27,31-33,35-37,40,43,44] and the remaining 3 in Asia.[26,39,49] The results  
15  
16 of total fractures were available in 12 studies, hip fractures in all studies, distal forearm  
17  
18 fractures in 8 studies, upper arm fractures in 6 studies, ankle fractures in 4 studies, and  
19  
20 vertebral fractures in 6 studies. Study quality was evaluated by NOS, and a study with  
21  
22 seven or more stars was regarded as a high-quality study. Overall, 7, 8, 6, and the  
23  
24 remaining 4 studies had scores of 9, 8, 7, and 6, respectively (S2 Table).  
25  
26  
27  
28  
29  
30  
31  
32  
33  
34  
35  
36  
37  
38  
39  
40  
41  
42  
43  
44  
45  
46  
47  
48  
49  
50  
51  
52  
53  
54  
55  
56  
57  
58  
59  
60

### **Total fractures**

Overall, 12 studies reported an association between DM and the risk of total fractures. The summary RR indicated that compared with non-DM, having DM was associated with an increased risk of total fractures (RR: 1.32; 95% CI: 1.17–1.48;  $P < 0.001$ ; Fig 2) and substantial heterogeneity was detected ( $I^2 = 97.1\%$ ;  $P < 0.001$ ). The sensitivity analysis revealed that the conclusion was not affected by the sequential exclusion of individual studies from the overall analysis (S3 Table). A subgroup analysis of total fractures based on country, DM type, sex, and study design was performed. The results

showed that DM patients had an increased risk of total fractures in nearly all subsets except for studies conducted in Eastern countries (Table 2). Furthermore, the RR ratio for the comparison between T1DM and T2DM of the risk of total fractures was significantly increased, and the association was also statistically significant (ratio of RR: 1.24; 95% CI: 1.08–1.41; P=0.002; Table 2).

Table 2. Subgroup analysis for total fracture based on country, DM types, sex, and study design

| Factors      | Subsets       | RR and 95%CI     | P value | I <sup>2</sup> (%) | P value for heterogeneity | Ratio of RR between subgroups | P value for ratios of RR |
|--------------|---------------|------------------|---------|--------------------|---------------------------|-------------------------------|--------------------------|
| Country      | Western       | 1.32 (1.17-1.50) | <0.001  | 97.4               | <0.001                    | 1.07 (0.76-1.52)              | 0.690                    |
|              | Eastern       | 1.23 (0.89-1.70) | 0.214   | -                  | -                         |                               |                          |
| DM types     | I             | 1.51 (1.35-1.68) | <0.001  | 78.3               | <0.001                    | 1.24 (1.08-1.41)              | 0.002                    |
|              | II            | 1.22 (1.13-1.31) | <0.001  | 83.0               | <0.001                    |                               |                          |
| Sex          | Men           | 1.49 (1.20-1.85) | <0.001  | 96.1               | <0.001                    | 1.14 (0.89-1.46)              | 0.313                    |
|              | Women         | 1.31 (1.16-1.49) | <0.001  | 92.8               | <0.001                    |                               |                          |
| Study design | Prospective   | 1.32 (1.20-1.46) | <0.001  | 83.4               | <0.001                    | 1.01 (0.84-1.21)              | 0.936                    |
|              | Retrospective | 1.31 (1.12-1.54) | 0.001   | 97.6               | <0.001                    |                               |                          |

\*CI: confidence interval; DM: diabetes mellitus; RR: relative risk

## Hip fracture

In total, 25 studies reported an association between DM and the risk of hip fracture. In

the pooled analysis, the comparison of DM and non-DM showed a harmful effect on hip fracture (RR: 1.77; 95% CI: 1.56–2.02;  $P < 0.001$ ; Fig 3). Although substantial heterogeneity was detected across the included studies ( $I^2 = 98.0\%$ ;  $P < 0.001$ ), the conclusion did not change after sequential exclusion of individual studies (S4 Table). The results of subgroup analysis for hip fracture are listed in Table 3, and all results indicated that DM had a harmful effect on hip fracture. Furthermore, the RR ratio showed a statistically significant association between DM and the risk of hip fracture in T1DM when compared with that of T2DM (ratio of RR: 3.43; 95% CI: 2.27–5.17;  $P < 0.001$ ).

Table 3. Subgroup analysis for hip fracture based on country, DM types, sex, and study design

| Factors      | Subsets       | RR and 95%CI     | P value | $I^2$ (%) | P value for heterogeneity | Ratio of RR between subgroups | P value for ratios of RR |
|--------------|---------------|------------------|---------|-----------|---------------------------|-------------------------------|--------------------------|
| Country      | Western       | 1.79 (1.56-2.05) | <0.001  | 97.5      | <0.001                    | 1.04 (0.81-1.34)              | 0.759                    |
|              | Eastern       | 1.72 (1.39-2.14) | <0.001  | 89.5      | <0.001                    |                               |                          |
| DM types     | I             | 4.35 (2.91-6.49) | <0.001  | 95.4      | <0.001                    | 3.43 (2.27-5.17)              | <0.001                   |
|              | II            | 1.27 (1.16-1.39) | <0.001  | 85.5      | <0.001                    |                               |                          |
| Sex          | Men           | 2.05 (1.68-2.51) | <0.001  | 97.0      | <0.001                    | 1.00 (0.78-1.29)              | 0.969                    |
|              | Women         | 2.04 (1.76-2.37) | <0.001  | 97.5      | <0.001                    |                               |                          |
| Study design | Prospective   | 2.02 (1.71-2.39) | <0.001  | 91.4      | <0.001                    | 1.09 (0.87-1.36)              | 0.472                    |
|              | Retrospective | 1.86 (1.60-2.16) | <0.001  | 98.7      | <0.001                    |                               |                          |

\*CI: confidence interval; DM: diabetes mellitus; RR: relative risk

## Distal forearm fracture

Overall, eight studies reported an association between DM and the risk of distal forearm fracture. The summary RR showed that DM was not associated with the risk of distal forearm fracture (RR: 1.02; 95% CI: 0.88–1.19; P=0.809; Fig 4) and non-significant heterogeneity was observed ( $I^2=27.5\%$ ; P=0.209). The sensitivity analysis suggested that the conclusion was not affected by the exclusion of any specific study (S5 Table). The subgroup analysis indicated that the conclusions in each subset continued to be non-significant and no significant differences were observed between subgroups based on country, DM type, sex, or study design (Table 4).

Table 4. Subgroup analysis for distal forearm fracture based on country, DM types, sex, and study design

| Factors  | Subsets     | RR and 95%CI     | P value | $I^2$ (%) | P value for heterogeneity | Ratio of RR between subgroups | P value for ratios of RR |          |             |                  |       |      |       |                   |       |       |                  |       |      |       |       |             |                  |       |      |       |                   |       |       |                  |       |     |       |       |             |                  |       |      |
|----------|-------------|------------------|---------|-----------|---------------------------|-------------------------------|--------------------------|----------|-------------|------------------|-------|------|-------|-------------------|-------|-------|------------------|-------|------|-------|-------|-------------|------------------|-------|------|-------|-------------------|-------|-------|------------------|-------|-----|-------|-------|-------------|------------------|-------|------|
| Country  | Western     | 1.04 (0.87-1.23) | 0.687   | 37.7      | 0.141                     | 1.04 (0.48-2.26)              | 0.921                    |          |             |                  |       |      |       |                   |       |       |                  |       |      |       |       |             |                  |       |      |       |                   |       |       |                  |       |     |       |       |             |                  |       |      |
|          | Eastern     | 1.00 (0.47-2.13) | 1.000   | -         | -                         |                               |                          | DM types | I           | 1.09 (0.43-2.75) | 0.861 | 78.3 | 0.032 | 1.12 (0.43-2.94)  | 0.812 | II    | 0.97 (0.66-1.09) | 0.573 | 13.1 | 0.323 | Sex   | Men         | 1.04 (0.66-1.65) | 0.863 | 58.5 | 0.090 | 1.12 (0.70-1.80)  | 0.644 | Women | 0.93 (0.82-1.05) | 0.257 | 6.3 | 0.380 | Study | Prospective | 1.00 (0.83-1.19) | 0.982 | 41.0 |
| DM types | I           | 1.09 (0.43-2.75) | 0.861   | 78.3      | 0.032                     | 1.12 (0.43-2.94)              | 0.812                    |          |             |                  |       |      |       |                   |       |       |                  |       |      |       |       |             |                  |       |      |       |                   |       |       |                  |       |     |       |       |             |                  |       |      |
|          | II          | 0.97 (0.66-1.09) | 0.573   | 13.1      | 0.323                     |                               |                          | Sex      | Men         | 1.04 (0.66-1.65) | 0.863 | 58.5 | 0.090 | 1.12 (0.70-1.80)  | 0.644 | Women | 0.93 (0.82-1.05) | 0.257 | 6.3  | 0.380 | Study | Prospective | 1.00 (0.83-1.19) | 0.982 | 41.0 | 0.094 | 0.93 (0.69-01.27) | 0.662 |       |                  |       |     |       |       |             |                  |       |      |
| Sex      | Men         | 1.04 (0.66-1.65) | 0.863   | 58.5      | 0.090                     | 1.12 (0.70-1.80)              | 0.644                    |          |             |                  |       |      |       |                   |       |       |                  |       |      |       |       |             |                  |       |      |       |                   |       |       |                  |       |     |       |       |             |                  |       |      |
|          | Women       | 0.93 (0.82-1.05) | 0.257   | 6.3       | 0.380                     |                               |                          | Study    | Prospective | 1.00 (0.83-1.19) | 0.982 | 41.0 | 0.094 | 0.93 (0.69-01.27) | 0.662 |       |                  |       |      |       |       |             |                  |       |      |       |                   |       |       |                  |       |     |       |       |             |                  |       |      |
| Study    | Prospective | 1.00 (0.83-1.19) | 0.982   | 41.0      | 0.094                     | 0.93 (0.69-01.27)             | 0.662                    |          |             |                  |       |      |       |                   |       |       |                  |       |      |       |       |             |                  |       |      |       |                   |       |       |                  |       |     |       |       |             |                  |       |      |



|        |               |                  |       |     |       |
|--------|---------------|------------------|-------|-----|-------|
| design | Retrospective | 1.07 (0.84-1.37) | 0.565 | 0.0 | 0.944 |
|--------|---------------|------------------|-------|-----|-------|

\*CI: confidence interval; DM: diabetes mellitus; RR: relative risk

### Upper arm fracture

In total, six studies reported an association between DM and the risk of upper arm fracture. Compared with non-DM, DM had a higher risk of upper arm fracture (RR: 1.47; 95% CI: 1.02–2.10; P=0.037; Fig 5) and evidence of significant heterogeneity was observed ( $I^2=84.9\%$ ; P<0.001). The sensitivity analysis indicated that the results varied possibly due to the smaller number of studies on fractures occurring in the upper arm (S6 Table). The subgroup analysis indicated that DM had no significant impact on upper arm fracture in men, whereas this risk increased in other subsets (Table 5).

Table 5. Subgroup analysis for upper arm fracture based on country, DM types, sex, and study design.

| Factors  | Subsets | RR and 95%CI     | P value | $I^2(\%)$ | P value for heterogeneity | Ratio of RR between subgroups | P value for ratios of RR |
|----------|---------|------------------|---------|-----------|---------------------------|-------------------------------|--------------------------|
| Country  | Western | 1.47 (1.02-2.10) | 0.037   | 84.9      | <0.001                    | -                             | -                        |
|          | Eastern | -                | -       | -         | -                         | -                             | -                        |
| DM types | I       | 1.83 (1.41-2.39) | <0.001  | 0.0       | 0.487                     | 1.19 (0.82-1.72)              | 0.359                    |
|          | II      | 1.54 (1.19-1.99) | 0.001   | 79.6      | <0.001                    |                               |                          |
| Sex      | Men     | 1.21 (0.80-1.83) | 0.368   | 73.2      | 0.011                     | 0.82 (0.50-1.36)              | 0.450                    |
|          | Women   | 1.47 (1.10-1.96) | 0.009   | 79.1      | <0.001                    |                               |                          |

|              |               |                  |       |      |        |                  |       |
|--------------|---------------|------------------|-------|------|--------|------------------|-------|
| Study design | Prospective   | 1.38 (1.07-1.76) | 0.011 | 76.0 | <0.001 | 0.80 (0.47-1.36) | 0.412 |
|              | Retrospective | 1.72 (1.08-2.73) | 0.022 | 68.5 | 0.075  |                  |       |

\*CI: confidence interval; DM: diabetes mellitus; RR: relative risk

### Ankle fracture

In all, four studies reported an association between DM and the risk of ankle fracture.

The risk of ankle fracture significantly increased in DM patients (RR: 1.24; 95% CI:

1.10–1.40;  $P < 0.001$ ; Fig 6) with no evidence of heterogeneity ( $I^2 = 0.0\%$ ;  $P = 0.400$ ). The

results of the sensitivity analysis were consistent with those of the overall analysis and

are shown in S7 Table. The subgroup analysis showed no association between DM and

ankle fracture risk in men, whereas in other subsets, the risk was significantly increased

(Table 6). Furthermore, T1DM patients were at a greater risk of ankle fracture than

were T2DM patients (ratio of RR: 1.71; 95% CI: 1.06–1.78;  $P = 0.029$ ; Table 6).

Table 6. Subgroup analysis for ankle fracture based on country, DM types, sex, and study design.

| Factors  | Subsets | RR and 95%CI     | P value | $I^2$ (%) | P value for heterogeneity | Ratio of RR between subgroups | P value for ratios of RR |
|----------|---------|------------------|---------|-----------|---------------------------|-------------------------------|--------------------------|
| Country  | Western | 1.24 (1.10-1.40) | <0.001  | 0.0       | 0.400                     | -                             | -                        |
|          | Eastern | -                | -       | -         | -                         |                               |                          |
| DM types | I       | 1.97 (1.24-3.14) | 0.004   | 29.3      | 0.234                     | 1.71 (1.06-2.78)              | 0.029                    |
|          | II      | 1.15 (1.01-1.31) | 0.029   | 0.0       | 0.886                     |                               |                          |

|    |              |               |                  |        |      |       |                  |       |
|----|--------------|---------------|------------------|--------|------|-------|------------------|-------|
| 1  |              |               |                  |        |      |       |                  |       |
| 2  |              |               |                  |        |      |       |                  |       |
| 3  | Sex          | Men           | 1.35 (0.68-2.65) | 0.390  | 74.1 | 0.021 | 0.96 (0.46-2.01) | 0.922 |
| 4  |              | Women         | 1.40 (1.07-1.84) | 0.014  | 51.6 | 0.083 |                  |       |
| 5  | Study design | Prospective   | 1.24 (1.10-1.40) | <0.001 | 0.0  | 0.400 | -                | -     |
| 6  |              | Retrospective | -                | -      | -    | -     |                  |       |
| 7  |              |               |                  |        |      |       |                  |       |
| 8  |              |               |                  |        |      |       |                  |       |
| 9  |              |               |                  |        |      |       |                  |       |
| 10 |              |               |                  |        |      |       |                  |       |
| 11 |              |               |                  |        |      |       |                  |       |

\*CI: confidence interval; DM: diabetes mellitus; RR: relative risk

### Vertebrae fracture

Overall, six studies reported an association between DM and the risk of vertebrae fracture. The results of pooled analysis indicated no significant association between DM and vertebrae fracture risk (RR: 1.56; 95% CI: 0.78–3.12; P=0.209; Fig 7); and there was evidence of significant heterogeneity ( $I^2=96.3\%$ ;  $P<0.001$ ). As a result, a sensitivity analysis was conducted and, although each study was sequentially excluded from the pooled analysis, the conclusion was not affected by the exclusion of any specific study (S8 Table). The subgroup analysis indicated that DM was associated with an increased risk of vertebrae fracture in retrospective cohort studies, whereas no significant effect in other subsets and no difference between subgroups were observed (Table 7).

Table 7. Subgroup analysis for vertebrae fracture based on country, DM types, sex, and study design.

| 58 | Factors | Subsets | RR and 95%CI | P value | $I^2(\%)$ | P value for heterogeneity | Ratio of RR between subgroups | P value for ratios of RR |
|----|---------|---------|--------------|---------|-----------|---------------------------|-------------------------------|--------------------------|
| 59 |         |         |              |         |           |                           |                               |                          |
| 60 |         |         |              |         |           |                           |                               |                          |

|              |               |                   |       |      |        |                  |       |
|--------------|---------------|-------------------|-------|------|--------|------------------|-------|
| Country      | Western       | 1.74 (0.82-3.69)  | 0.148 | 96.5 | <0.001 | 1.93 (0.79-4.71) | 0.146 |
|              | Eastern       | 0.90 (0.56-1.45)  | 0.664 | -    | -      |                  |       |
| DM types     | I             | -                 | -     | -    | -      | -                | -     |
|              | II            | 1.74 (0.96-3.16)  | 0.070 | 96.7 | <0.001 |                  |       |
| Sex          | Men           | 2.26 (0.40-12.73) | 0.354 | 88.9 | 0.003  | 1.42 (0.23-8.85) | 0.706 |
|              | Women         | 1.59 (0.88-2.87)  | 0.125 | 84.1 | <0.001 |                  |       |
| Study design | Prospective   | 1.36 (0.88-2.11)  | 0.167 | 66.4 | 0.018  | 0.54 (0.25-1.14) | 0.105 |
|              | Retrospective | 2.54 (1.37-4.70)  | 0.003 | 96.1 | <0.001 |                  |       |

\*CI: confidence interval; DM: diabetes mellitus; RR: relative risk

### Publication bias

From the review of the funnel plots, publication bias for total fractures could not be ruled out (Fig 8). However, the Egger and Begg test results showed no evidence of publication bias (P value for Egger: 0.311; P value for Begg: 0.537).

### DISCUSSION

Due to the consideration that the characteristics of DM patients might have affected the incidence of fractures at different sites, we used cohort studies to evaluate the correlations between DM and fractures according to country, DM type, sex, and study design. The meta-analysis included 7,185,572 participants from 16 prospective and 9 retrospective cohort studies with a broad range of individual characteristics. The

1  
2  
3  
4 findings of this study indicated that DM was associated with an elevated risk of total,  
5  
6 hip, upper arm, and ankle fractures but had no effect on distal forearm and vertebral  
7  
8 fractures. The findings of the subgroup analyses were mostly consistent with those of  
9  
10 the overall analysis except for those of total fracture in Eastern countries and upper arm  
11  
12 and ankle fractures in men. Finally, compared with T2DM, T1DM was associated with  
13  
14 a greater risk of total, hip, and ankle fracture.  
15  
16  
17  
18  
19  
20

21 A previous study based on 14 observational studies evaluated the association between  
22  
23 T1DM and the risk of fractures [50]. The results indicated that T1DM was associated  
24  
25 with a higher risk of total (RR, 3.16; P=0.002), hip (RR, 3.78; P<0.001) and spinal  
26  
27 fractures (RR, 2.88; P<0.001). However, different study designs might bias this  
28  
29 association and the role of the T2DM type was not evaluated in previous studies.  
30  
31 Similar limitations of two other meta-analyses have already been described.[10,11]  
32  
33 Therefore, the present meta-analysis of available cohort studies was performed to  
34  
35 address these limitations.  
36  
37  
38  
39  
40  
41  
42  
43

44 The pooled results showed a significantly increased risk of total, hip, upper arm, and  
45  
46 ankle fractures in DM patients compared with those in non-DM individuals; this result  
47  
48 is consistent with those of previous studies.[10,11,50] However, several studies  
49  
50 reported inconsistent results. After adjusting for BMI, sex, race, and age, Strotmeyer et  
51  
52 al.[25] indicated that T2DM had no significant effect on the risk of hip fracture. Jung  
53  
54 et al.[26] showed by the RR that in the T2DM cohort, increased risk of total and hip  
55  
56  
57  
58  
59  
60

1  
2  
3  
4 fractures occurred, although these increases were not statistically significant. One  
5  
6 possible explanation for this could be the number of patients newly diagnosed with DM  
7  
8 that might be higher than that reported in other studies; and the increase in insulin level  
9  
10 might affect bone metabolism. Furthermore, a smaller sample size and a lower  
11  
12 incidence of fracture events were associated with lower statistical power and broad 95%  
13  
14 CI in the previous study. Finally, the summary results for upper arm and ankle fractures  
15  
16 might have varied due to the limited number of studies included; the interaction of these  
17  
18 associations with age, severity of DM, and antidiabetic drugs should be explored.  
19  
20  
21  
22  
23  
24  
25

26  
27 There were no significant differences between DM patients and non-DM individuals  
28  
29 with respect to distal forearm fracture. Most individual studies reported similar results,  
30  
31 whereas the FRAILCO study indicated that DM was associated with a lower risk of  
32  
33 distal forearm fracture.[27] The reason for this difference could be the study compared  
34  
35 patients taking oral antidiabetics with non-DM individuals. Furthermore, the incidence  
36  
37 of distal forearm fracture might be underestimated in register-based data. Finally, distal  
38  
39 forearm fractures usually develop earlier in life, and the age of the participants in the  
40  
41 individual studies might play a confounding role. Similar results were found for  
42  
43 vertebral fractures. Two of the included studies indicated that T2DM was associated  
44  
45 with a higher risk of vertebral fractures.[42,44] The reason for this finding could be the  
46  
47 baseline levels of serum  $\gamma$ -glutamyl transferase and metabolic syndrome in women; as  
48  
49 well as alcohol overconsumption, which are associated with higher serum  $\gamma$ -glutamyl  
50  
51 transferase levels in men, and may play an important role in the risk of vertebral and  
52  
53  
54  
55  
56  
57  
58  
59  
60

1  
2  
3  
4 ankle fractures.[51-53]  
5  
6

7 The results of the stratified analysis were generally consistent with those of the overall  
8 analysis. However, two breakthroughs should be highlighted: (1) T1DM was associated  
9 with a higher risk of total, hip, and ankle fractures compared with that in T2DM. The  
10 possible reasons for this include the different reasons for the incidence of fracture, such  
11 as differences in BMI between T1DM and T2DM, which might have played a  
12 protective role in fractures.[54] Furthermore, while BMI is a major determinant of  
13 BMD and fracture risk, not all studies adjusted for the impact of BMI, which could  
14 have affected the intrinsic correlation of DM and fractures. (2) Although there was no  
15 significant effect on upper arm and ankle fractures in men with T2DM, these results  
16 might be unreliable due to the small number of studies included. This finding should  
17 be verified in future large-scale cohort studies.  
18  
19  
20  
21  
22  
23  
24  
25  
26  
27  
28  
29  
30  
31  
32  
33  
34  
35  
36  
37

38 This meta-analysis had several limitations. The DM diagnosis in individual studies was  
39 not consistent; this may have introduced confounders in the representative DM cohort.  
40 Furthermore, retrospective cohort studies might have introduced recall and selection  
41 biases, which could affect the evidence levels and representativeness of the cohorts. In  
42 addition, the adjusted models differed across the included studies; these factors might  
43 have played important roles in the development of fractures. Additionally, the  
44 substantial heterogeneity could not be explored completely due to the unavailability of  
45 several important factors, including metabolic syndrome and lifestyle. Finally, there  
46  
47  
48  
49  
50  
51  
52  
53  
54  
55  
56  
57  
58  
59  
60

1  
2  
3  
4 were limitations inherent to any meta-analysis, including publication bias and the lack  
5  
6  
7 of availability of individual data.  
8  
9

10 In conclusion, DM was associated with total, hip, upper arm, and ankle fractures.  
11  
12 Furthermore, patients with T1DM had a higher risk of total, hip, and ankle fractures  
13  
14 compared with those with T2DM. There was no sex difference in fractures at different  
15  
16 sites. Future studies are warranted to clarify the effect of anti-diabetic therapies and  
17  
18 investigate effective prevention strategies for fractures at different sites.  
19  
20  
21  
22  
23  
24  
25  
26  
27

### 28 **Authors' contributions**

29  
30  
31 Jian-Ling Du and Hao Wang contributed to the conception and design; Hao Wang,  
32  
33 Ying Ba, and Qian Xing contributed to acquisition, analysis, and interpretation of data;  
34  
35 Hao Wang and Jian-Ling Du were involved in drafting or critical revision of the  
36  
37 manuscript. All the authors approved the final version.  
38  
39  
40  
41  
42

43 **Conflict of interests:** All authors declare no conflict of interest.  
44  
45

46 **Funding statement:** This research did not receive any specific grant from funding  
47  
48 agencies in the public, commercial, or not-for-profit sectors.  
49  
50

51  
52 **Data sharing statement:** Extra data can be accessed via the Dryad data repository at  
53  
54 <http://datadryad.org/> with the doi:10.5061/dryad.nf15dn8  
55  
56  
57  
58  
59  
60



## References:

1. Wild S, Roglic G, Green A, Sicree R, King, H. Global prevalence of diabetes: estimates for the year 2000 and projections for 2030. *Diabetes Care*2004;**27**: 1047-1053.
2. Boyle JP, *et al.* Projection of diabetes burden through 2050: impact of changing demography and disease prevalence in the U.S. *Diabetes Care*2001; **24**: 1936-1940.
3. Ray KK, *et al.* Effect of intensive control of glucose on cardiovascular outcomes and death in patients with diabetes mellitus: a meta-analysis of randomised controlled trials. *Lancet* 2009; **373**: 1765-72.
4. Peters SA, Huxley RR, Woodward M. Diabetes as a risk factor for stroke in women compared with men: a systematic review and meta-analysis of 64 cohorts, including 775,385 individuals and 12,539 strokes. *Lancet*2014;**383**: 1973-80.
5. Tsilidis KK, Kasimis JC, Lopez DS, Ntzani EE, Ioannidis JP. Type 2 diabetes and cancer: umbrella review of meta-analyses of observational studies. *BMJ*2015;**350**: g7607.
6. Narres M, *et al.* The Incidence of End-Stage Renal Disease in the Diabetic (Compared to the Non-Diabetic) Population: A Systematic Review. *PLoS One*2016; **11**: e0147329.
7. Carnevale V, Romagnoli E, D'Erasmus E. Skeletal involvement in patients with diabetes mellitus. *Diabetes Metab Res Rev*2004;**20**: 196-204.
8. Raskin P, Stevenson MRM, Barilla DE, Pak CY. The hypercalciuria of diabetes mellitus: its amelioration with insulin. *Clin Endocrinol*1978;**9**: 329-335.

- 1  
2  
3  
4 9. McNair P, *et al.* Bone mineral loss in insulin-treated diabetes mellitus: studies on pathogenesis.  
5  
6 *Acta Endocrinol* 1979;**90**: 463-472.  
7
- 8  
9 10. Vestergaard P. Discrepancies in bone mineral density and fracture risk in patients with type 1  
10  
11 and type 2 diabetes: a meta-analysis. *Osteoporos Int*2007; **18**: 427-444.  
12
- 13  
14 11. Fan Y, Wei Y, Lang Y, Liu Y. Diabetes mellitus and risk of hip fractures: a meta-analysis.  
15  
16 *OsteoporosInt*2016;**27**: 219-228.  
17
- 18  
19 12. GiangregorioLM, *et al.*FRAX Underestimates Fracture Risk in Patients With Diabetes. *J Bone*  
20  
21 *Miner Res*2012;**27**: 301-8.  
22
- 23  
24 13. Fraser LA, *et al.*Clinical riskfactors for fracture in diabetes: a matchedcohort analysis. *J Clin*  
25  
26 *Densitom*2011;**14**:416-21.  
27
- 28  
29 14. Moher D, Liberati A, Tetzlaff J, Altman DG; PRISMA Group. Preferred reporting items for  
30  
31 systematic reviews and meta-analyses: the PRISMA statement. *PLoS Med*2009; **6**:e1000097.  
32
- 33  
34 15. Wells G, Shea B, O'Connell D. The Newcastle-Ottawa Scale (NOS) for assessing the quality of  
35  
36 nonrandomised studies in meta-analyses. Ottawa (ON): Ottawa Hospital Research Institute 2009.  
37  
38 Available: [http://www.ohri.ca/programs/clinical\\_epidemiology/oxford.htm](http://www.ohri.ca/programs/clinical_epidemiology/oxford.htm).  
39
- 40  
41 16. DerSimonian R, Laird N. Meta-analysis in clinical trials. *Control Clin Trials*1986;**7**: 177- 88.  
42
- 43  
44 17. Ades AE, LuG, Higgins JP. The interpretation of random-effects metaanalysis in decision  
45  
46 models. *Med Decis Making*2005;**25**: 646-54.  
47
- 48  
49 18. Deeks JJ, Higgins JPT, Altman DG. Analyzing data and undertaking meta-analyses. In: Higgins  
50  
51 J, Green S, eds. Cochrane Handbook for Systematic Reviews of Interventions 5.0.1. Oxford, UK:  
52  
53 The Cochrane Collaboration: 2008; chap 9.  
54
- 55  
56 19. Higgins JPT, Thompson SG, DeeksJJ, Altman DG. Measuring inconsistency in meta-analyses.  
57  
58 *BMJ*2003; **327**: 557-60.  
59
- 60  
60 20. Tobias, A. Assessing the influence of a single study inmeta-analysis. *Stata Tech Bull* 1999;

1  
2  
3  
4 47:15–17.  
5

6 21. Altman DG, Bland JM. Interaction revisited: the difference between two estimates. *BMJ* 2003;  
7  
8 326: 219.  
9

10  
11 22. Li XH, Yu FF, Zhou YH, He J. Association between alcohol consumption and the risk of  
12 incident type 2 diabetes: a systematic review and dose-response meta-analysis. *Am J Clin*  
13 *Nutr* 2016;103:818-29.  
14  
15

16  
17  
18 23. Egger M, Davey Smith G, Schneider M, Minder C. Bias in meta-analysis detected by a simple,  
19 graphical test. *BMJ* 1997; 315: 629–34.  
20  
21

22  
23 24. Begg CB, Mazumdar M. Operating characteristics of a rank correlation test for publication bias.  
24 *Biometrics* 1994; 50: 1088–1101.  
25  
26

27  
28 25. Strotmeyer ES, et al. Potential explanatory factors for higher incident hip fracture risk in  
29 older diabetic adults. *Curr Gerontol Geriatr Res* 2011; 2011:979270.  
30  
31

32  
33 26. Jung JK, et al. Fracture Incidence and Risk of Osteoporosis in Female Type 2 Diabetic Patients  
34 in Korea. *Diabetes Metab J* 2012; 36:144-150.  
35  
36

37  
38 27. Wallander M, Axelsson KF, Nilsson AG, Lundh D, Lorentzon M. Type 2 Diabetes and Risk of  
39 Hip Fractures and Non-Skeletal Fall Injuries in the Elderly: A Study From the Fractures and  
40 Fall Injuries in the Elderly Cohort (FRAILCO). *J Bone Miner Res* 2016: doi: 10.1002/jbmr.3002.  
41  
42

43  
44 28. Dobnig H, et al. Type 2 diabetes mellitus in nursing home patients: effects on bone turnover,  
45 bone mass, and fracture risk. *J Clin Endocrinol Metab* 2016; 91:3355-63.  
46  
47

48  
49 29. Ottenbacher KJ, Ostir GV, Peek MK, Goodwin JS, Markides KS. Diabetes mellitus as a risk  
50 factor for hip fracture in Mexican American older adults. *J Gerontol A Biol Sci Med Sci* 2002; 57:M648-  
51 53.  
52  
53

54  
55  
56 30. Nicodemus KK, Folsom AR, Iowa Women's Health Study. Type 1 and type 2 diabetes and  
57 incident hip fractures in postmenopausal women. *Diabetes Care* 2001; 24:1192-7.  
58  
59  
60

- 1  
2  
3  
4 31. Hothersall EJ, *et al.* Contemporary risk of hip fracture in type 1 and type 2 diabetes: a  
5 national registry study from Scotland. *J Bone Miner Res* 2014; **29**:1054-60.  
6  
7  
8 32. Martinez-Laguna D, *et al.* Incident type 2 diabetes and hip fracture risk: a population-based  
9 matched cohort study. *Osteoporos Int* 2015; **26**: 827–833.  
10  
11  
12  
13 33. Weber DR, Haynes K, Leonard MB, Willi SM, Denburg MR. Type 1 Diabetes Is Associated  
14 With an Increased Risk of Fracture Across the Life Span: A Population-Based Cohort Study Using  
15 The Health Improvement Network (THIN). *Diabetes Care* 2015; **38**: 1913–1920.  
16  
17  
18  
19 34. Janghorbani M, Feskanich D, Willett WC, Hu F. Prospective study of diabetes and risk of hip  
20 fracture: the Nurses' Health Study. *Diabetes Care* 2006; **29**:1573-8.  
21  
22  
23  
24 35. Oei L, *et al.* High bone mineral density and fracture risk in type 2 diabetes as skeletal complications  
25 of inadequate glucose control: the Rotterdam Study. *Diabetes Care* 2013; **36**:1619-28.  
26  
27  
28  
29 36. Ahmed LA, Joakimsen RM, Berntsen GK, Fønnebø V, Schirmer H. Diabetes mellitus and the  
30 risk of non-vertebral fractures: the Tromsø study. *Osteoporos Int* 2006; **17**:495–500.  
31  
32  
33  
34 37. Miao J, Brismar K, Nyrén O, Ugarph-Morawski A, Ye W. Elevated hip fracture risk in  
35 type 1 diabetic patients: a population-based cohort study in Sweden. *Diabetes Care* 2005; **28**:2850-5.  
36  
37  
38  
39 38. Ivers RQ, Cumming RG, Mitchell P, Peduto AJ; Blue Mountains Eye Study. Diabetes and risk  
40 of fracture: The Blue Mountains Eye Study. *Diabetes Care* 2001; **24**:1198-203.  
41  
42  
43  
44 39. Koh WP, *et al.* Diabetes and risk of hip fracture in the Singapore Chinese Health Study. *Diabetes*  
45 *Care* 2010; **33**:1766-70.  
46  
47  
48  
49 40. Meyer HE, Tverdal A, Falch JA. Risk factors for hip fracture in middle-aged Norwegian women  
50 and men. *Am J Epidemiol* 1993; **137**:1203-11.  
51  
52  
53  
54 41. Lipscombe LL, Jamal SA, Booth GL, Hawker GA. The risk of hip fractures in older individuals  
55 with diabetes: a population-based study. *Diabetes Care* 2007; **30**:835-41.  
56  
57  
58  
59 42. Melton LJ, Leibson CL, Achenbach SJ, Therneau TM, Khosla S. Fracture risk in type 2 diabetes:  
60

- 1  
2  
3  
4 update of a population-based study. *J Bone Miner Res* 2008; **23**:1334-42.  
5  
6  
7 43. Forsen L, Meyer HE, Midthjell K, Edna TH. Diabetes mellitus and the incidence of hip fracture:  
8  
9 results from the Nord-Trøndelag Health Survey. *Diabetologia* 1999; **42**: 920-925.  
10  
11 44. Holmberg AH, *et al*. Risk factors for fragility fracture in middle age. A prospective population-  
12  
13 based study of 33,000 men and women. *Osteoporos Int* 2006; **17**: 1065-1077.  
14  
15  
16 45. Bonds DE, *et al*. Risk of fracture in women with type 2 diabetes: the Women's Health Initiative  
17  
18 Observational Study. *J Clin Endocrinol Metab* 2006; **91**:3404-10.  
19  
20  
21 46. Leslie WD, *et al*. Biphasic fracture risk in diabetes: A population-based study. *Bone* 2007; **40**:  
22  
23 1595-1601.  
24  
25  
26 47. Majumdar SR, *et al*. Longer Duration of Diabetes Strongly Impacts Fracture Risk Assessment:  
27  
28 The Manitoba BMD Cohort. *J Clin Endocrinol Metab* 2016; **101**: 4489-4496.  
29  
30  
31 48. Schwartz AV, *et al*. Older Women with Diabetes Have an Increased Risk of Fracture: A  
32  
33 Prospective Study. *J Clin Endocrinol Metab* 2001; **86**: 32-38.  
34  
35  
36 49. Chen HF, Ho CA, Li CY. Increased risks of hip fracture in diabetic patients of Taiwan: a  
37  
38 population-based study. *Diabetes Care* 2008; **31**:75-80.  
39  
40  
41 50. Shah VN, Shah CS, Snell-Bergeon JK. Type 1 diabetes and risk of fracture: meta-analysis and  
42  
43 review of the literature. *Diabet Med* 2015; **32**:1134-42.  
44  
45 51. Banciu T, Weidenfeld H, Marcoane E, Berinde L. Serum gamma-  
46  
47 glutamyltranspeptidase assay in the detection of alcohol consumers and in  
48  
49 the early andstadial diagnosis of alcoholic liver disease. *Med Interne* 1983; **21**:23-9.  
50  
51  
52 52. Trell E, Kristenson H, Fex G. Alcohol-related problems in middle-aged men with elevated serum  
53  
54 gamma-glutamyltransferase: a preventive medical investigation. *J Stud Alcohol* 1984; **45**:302-309  
55  
56  
57 53. Yokoyama H, Moriya S, Homma Y, Ogawa T. Association between gamma-glutamyl  
58  
59 transpeptidase activity and status of disorders constituting insulin resistance syndrome. *Alcohol Clin*  
60

1  
2  
3  
4 *Exp Res* 2003;**27**:22S–25S

5  
6 54. De Laet C,*et al.* Body mass index as a predictor of fracture risk: a meta-analysis. *Osteoporos*  
7  
8 *Int*2005; **16**:1330-8.  
9

10  
11  
12  
13  
14  
15  
16  
17  
18  
19  
20  
21  
22  
23  
24  
25  
26  
27  
28  
29  
30  
31  
32  
33  
34  
35  
36  
37  
38  
39  
40  
41  
42  
43  
44  
45  
46  
47  
48  
49  
50  
51  
52  
53  
54  
55  
56  
57  
58  
59  
60

For peer review only

**Figure legends:**

Fig 1. Study selection process.

Fig 2. Association between DM and the risk of total fractures.

Fig 3. Association between DM and the risk of hip fracture.

Fig 4. Association between DM and the risk of distal forearm fracture.

Fig 5. Association between DM and the risk of upper arm fracture.

Fig 6. Association between DM and the risk of ankle fracture.

Fig 7. Association between DM and the risk of vertebrae fracture.

Fig 8. Publish bias for total fractures.

**Supporting information**

S1 Table. Additional characteristics of studies included

S2 Table. Quality scores of prospective cohort studies using Newcastle-Ottawa Scale.

S3 Table. Sensitivity analysis for total fractures.

S4 Table. Sensitivity analysis for hip fracture.

S5 Table. Sensitivity analysis for distal forearm fracture.

S6 Table. Sensitivity analysis for upper arm fracture.

S7 Table. Sensitivity analysis for ankle fracture.

1  
2  
3  
4 S8 Table. Sensitivity analysis for vertebrae fracture.  
5

6 Checklist S1. PRISMA Checklist  
7

8  
9 Supplemental 1. Search strategy in PubMed  
10  
11  
12  
13  
14  
15  
16  
17  
18  
19  
20  
21  
22  
23  
24  
25  
26  
27  
28  
29  
30  
31  
32  
33  
34  
35  
36  
37  
38  
39  
40  
41  
42  
43  
44  
45  
46  
47  
48  
49  
50  
51  
52  
53  
54  
55  
56  
57  
58  
59  
60

For peer review only



1  
2  
3  
4  
5  
6  
7  
8  
9  
10  
11  
12  
13  
14  
15  
16  
17  
18  
19  
20  
21  
22  
23  
24  
25  
26  
27  
28  
29  
30  
31  
32  
33  
34  
35  
36  
37  
38  
39  
40  
41  
42  
43  
44  
45  
46  
47  
48  
49  
50  
51  
52  
53  
54  
55  
56  
57  
58  
59  
60

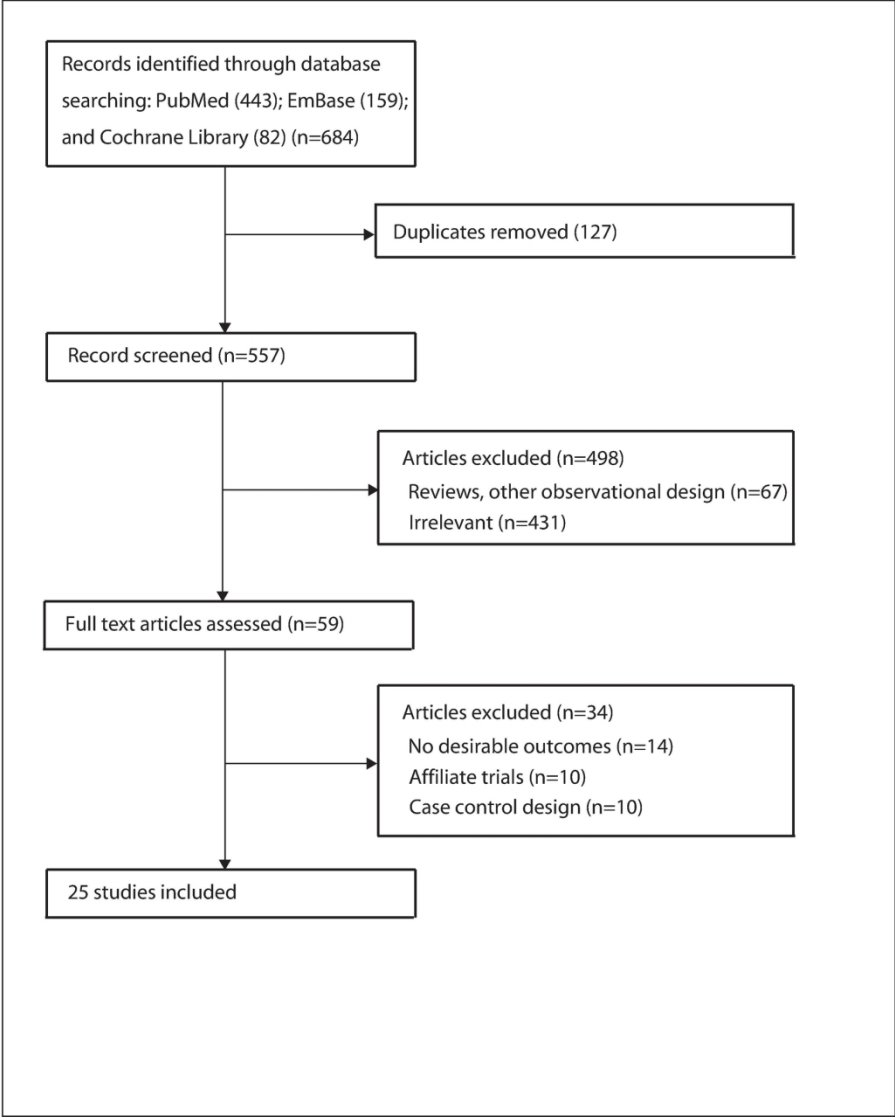

Fig 1. Study selection process.

168x188mm (300 x 300 DPI)

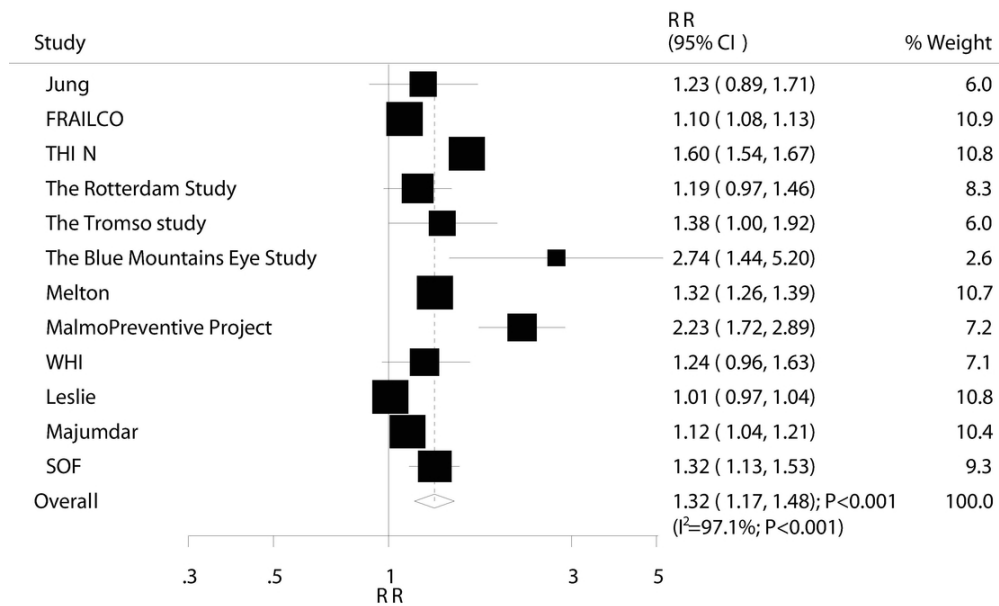

Fig 2. Association between DM and the risk of total fractures.

94x56mm (300 x 300 DPI)

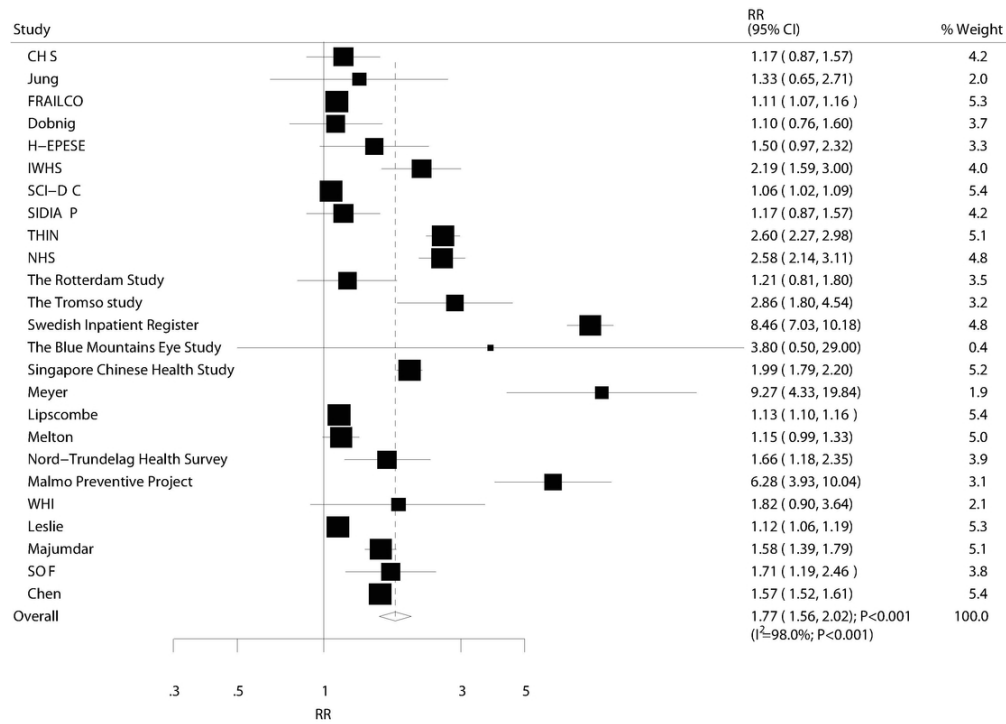

Fig 3. Association between DM and the risk of hip fracture.

93x67mm (300 x 300 DPI)

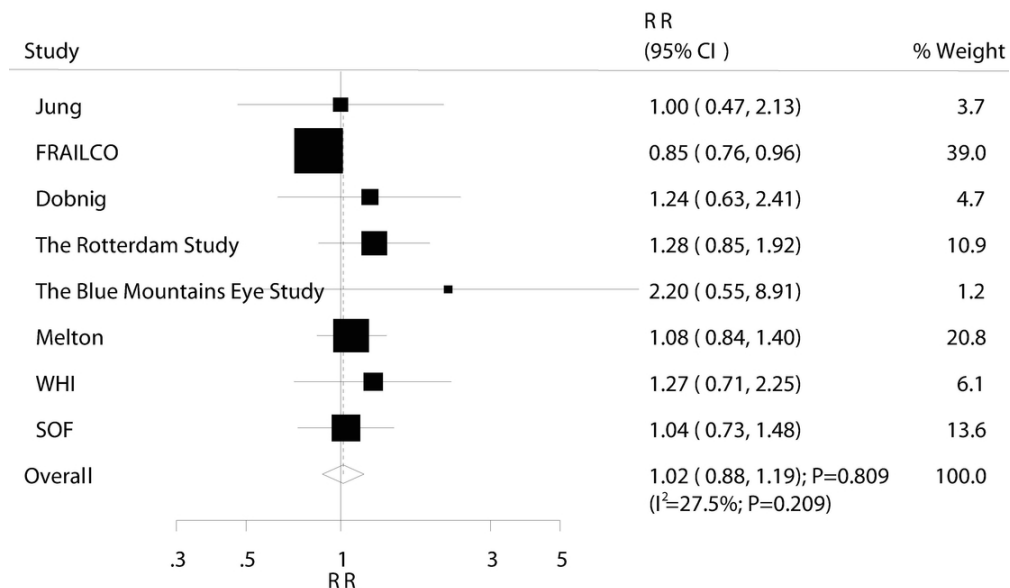

Fig 4. Association between DM and the risk of distal forearm fracture.

93x54mm (300 x 300 DPI)

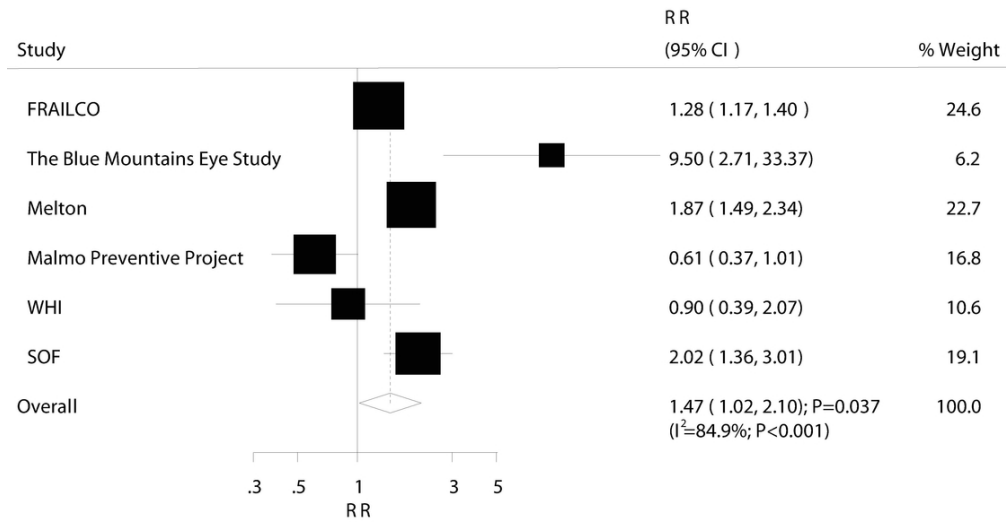

Fig 5. Association between DM and the risk of upper arm fracture.

94x48mm (300 x 300 DPI)

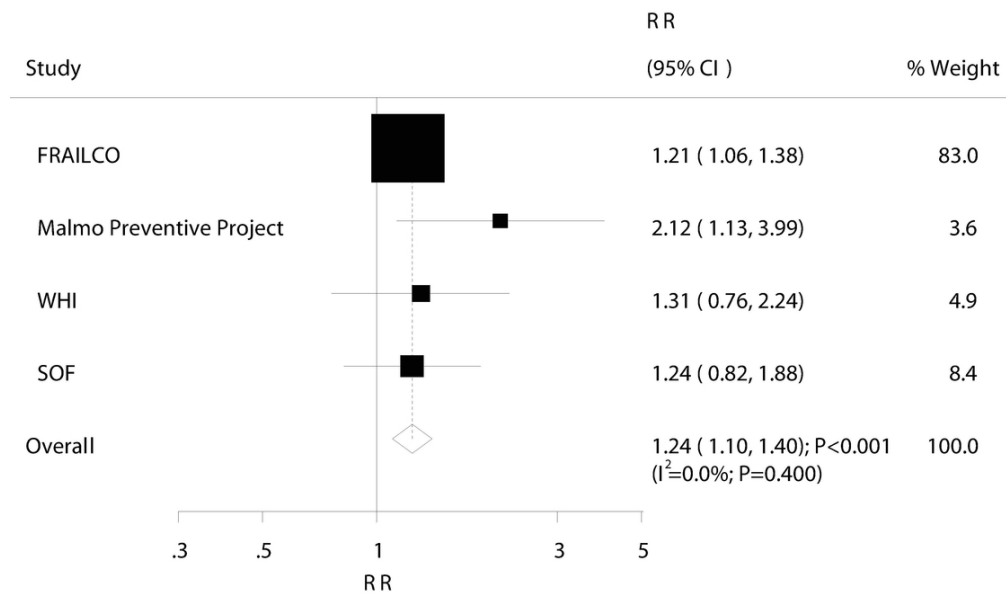

Fig 6. Association between DM and the risk of ankle fracture.

94x55mm (300 x 300 DPI)

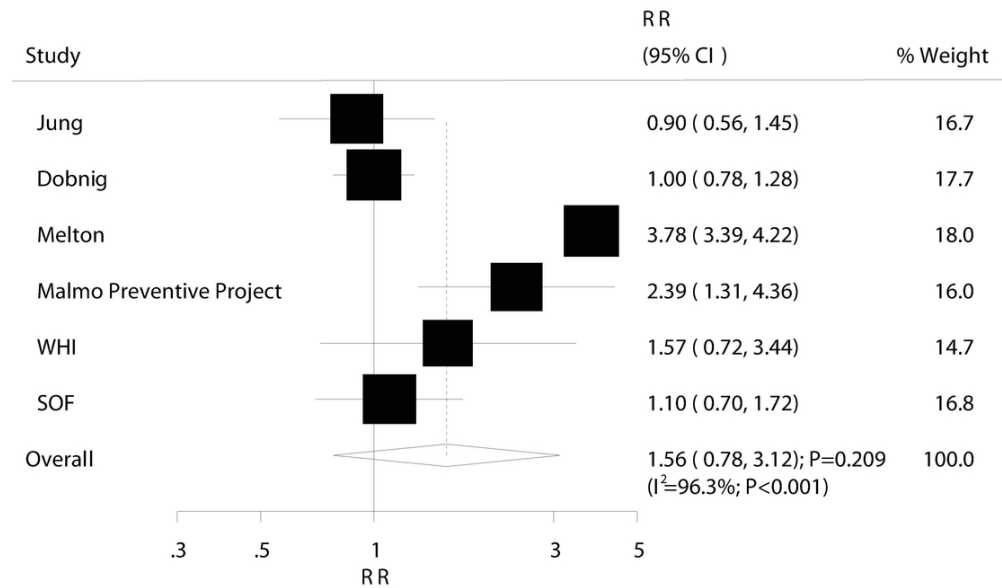

Fig 7. Association between DM and the risk of vertebrae fracture.

94x54mm (300 x 300 DPI)

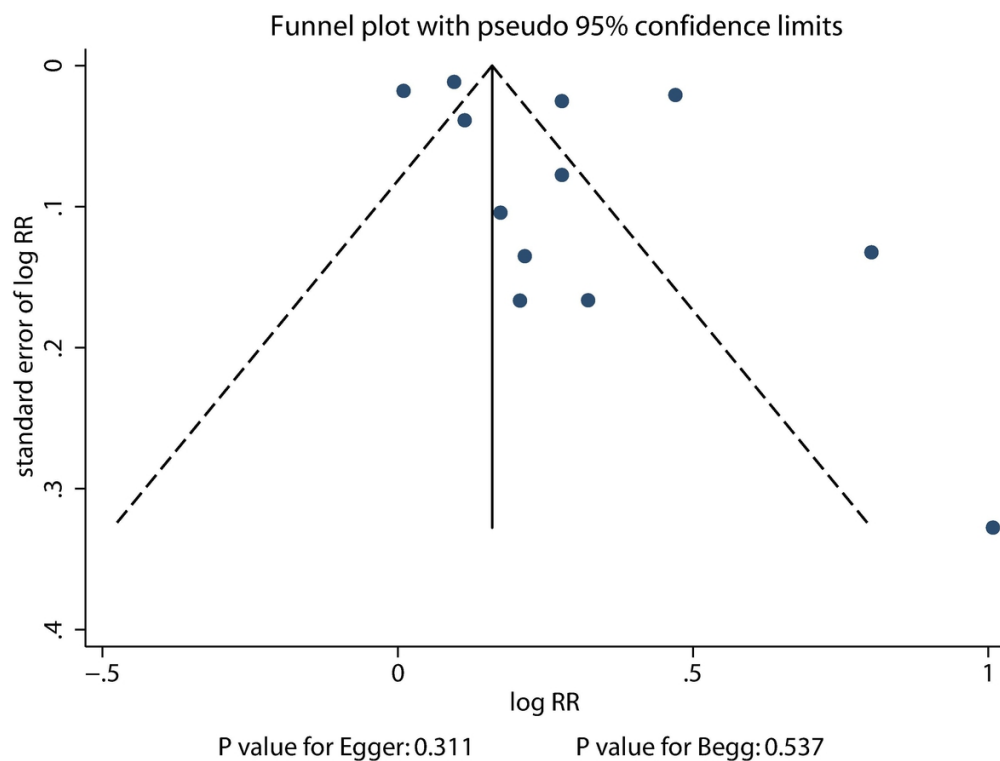

Fig 8. Publish bias for total fractures.

99x74mm (300 x 300 DPI)



S1 Table. Additional characteristics of studies included

| Study        | Current smoker (%) | BMI (kg/m <sup>2</sup> ) | DM ascertainment                                                                                                                                                                                                                                                                                                                                                                                                                                                                                                                                                                                                                                                                                                                                                                                                                                   | Adjusted factors                                                                                                               |
|--------------|--------------------|--------------------------|----------------------------------------------------------------------------------------------------------------------------------------------------------------------------------------------------------------------------------------------------------------------------------------------------------------------------------------------------------------------------------------------------------------------------------------------------------------------------------------------------------------------------------------------------------------------------------------------------------------------------------------------------------------------------------------------------------------------------------------------------------------------------------------------------------------------------------------------------|--------------------------------------------------------------------------------------------------------------------------------|
| CHS [25]     | 12.0               | 26.7                     | Hypoglycemic medication use or a fasting glucose $\geq 126$ mg/dL                                                                                                                                                                                                                                                                                                                                                                                                                                                                                                                                                                                                                                                                                                                                                                                  | Age, sex, race, BMI, AAI<0.9                                                                                                   |
| Lung [26]    | NA                 | <25.0                    | Oral hypoglycemic agents or received insulin treatment                                                                                                                                                                                                                                                                                                                                                                                                                                                                                                                                                                                                                                                                                                                                                                                             | Age                                                                                                                            |
| FRAILCO [27] | NA                 | 25.4                     | “treatment with insulin” as any known prescriptions of insulin and “treatment with oral antidiabetics” as any prescription of non-insulin antidiabetics (including injectable GLP-1 analogues) in the Drug Dispensation Register. Because many patients receive their diagnosis of type 2 diabetes in primary-care units and thus not included in the Patient Register and because of possible misclassifications between ICD E10 to E11, patients were classified as type 1 diabetes if they were diagnosed with E10 and had received prescriptions of insulin but no other non-insulin antidiabetic medications. We subsequently defined type 2 diabetes as all other patients with diabetes, based on either a diagnosis of E10 with oral antidiabetics, E11, or without any diagnosis but with known prescriptions of antidiabetic medications | Age, sex, weight, height, previous fracture, RA, glucocorticoid, alendronate use, and CCI, and self-reported known fall injury |
| Doornig [28] | NA                 | NA                       | Antidiabetic drugs prescribed, or were found to have glycosylated HbA1c levels of more than 5.9%                                                                                                                                                                                                                                                                                                                                                                                                                                                                                                                                                                                                                                                                                                                                                   | Age and weight                                                                                                                 |
| H-EPESE [29] | 42.1               | NA                       | Physician diagnosis                                                                                                                                                                                                                                                                                                                                                                                                                                                                                                                                                                                                                                                                                                                                                                                                                                | Age, gender, BMI, ever smoked, previous stroke, lower extremity functional ability, and distance vision                        |
| WHS [30]     | 15.0               | 26.9                     | Self-reported                                                                                                                                                                                                                                                                                                                                                                                                                                                                                                                                                                                                                                                                                                                                                                                                                                      | Age, smoking, estrogen use, BMI, and WTHR                                                                                      |
| SCI-DC [31]  | NA                 | NA                       | We defined type 1 diabetes on the basis of the type of diabetes assigned in the database with the additional requirement that the prescription history did not contradict this (ie, no evidence of lengthy period of diabetes before insulin and no coprescribing of nonmetformin oral diabetes drugs). Type 2 diabetes was defined as either a recorded diagnosis of type 2 diabetes or a diagnosis of type 1 diabetes that was contradicted by clinical history and prescription data                                                                                                                                                                                                                                                                                                                                                            | Age, calendar year, SIMD, and for the overall estimate, an SIMD-age interaction                                                |
| SIDIAP       | 15.6               | 29.3                     | T2DM diagnosis (ICD-10 codes E11.0, E11.1,                                                                                                                                                                                                                                                                                                                                                                                                                                                                                                                                                                                                                                                                                                                                                                                                         | BMI, previous fracture, oral corticoids                                                                                        |

1  
2  
3  
4  
5  
6  
7  
8  
9  
10  
11  
12  
13  
14  
15  
16  
17  
18  
19  
20  
21  
22  
23  
24  
25  
26  
27  
28  
29  
30  
31  
32  
33  
34  
35  
36  
37  
38  
39  
40  
41  
42  
43  
44  
45  
46  
47  
48  
49  
50  
51  
52  
53  
54  
55  
56  
57  
58  
59  
60

|                                     |      |      |                                                                                                                                                                                                 |                                                                                                                                                                                                                                                           |
|-------------------------------------|------|------|-------------------------------------------------------------------------------------------------------------------------------------------------------------------------------------------------|-----------------------------------------------------------------------------------------------------------------------------------------------------------------------------------------------------------------------------------------------------------|
| [32]                                |      |      | E11.2, E11.3, E11.4, E11.5, E11.6, E11.7, E11.8, and E11.9)                                                                                                                                     |                                                                                                                                                                                                                                                           |
| THIN [33]                           | 26.7 | 25.5 | Exposure to type 1 diabetes was defined by the presence of one or more Read codes specific for type 1 diabetes and the absence of a code specific for type 2 diabetes                           | Exposure to steroid medication, history of prior fracture, and presence of chronic kidney disease                                                                                                                                                         |
| NHS [34]                            | 17.9 | 26.0 | When women reported that diabetes had been diagnosed by a physician, confirmation was based on responses to a supplementary questionnaire about complications, diagnostic tests, and treatments | Age, BMI, physical activity, menopausal status and estrogen use, smoking and daily intake of calcium, vitamin D, and protein                                                                                                                              |
| The Rotterdam Study [35]            | 25.0 | 26.4 | Diabetes was defined as antidiabetic medication use or a preload or postload serum glucose level >11.1 mmol/L                                                                                   | Age, sex, height, weight, and femoral neck BMD                                                                                                                                                                                                            |
| The Tromsø study [36]               | 37.0 | 25.5 | Medical records                                                                                                                                                                                 | Age, BMI, smoking, and metabolic features                                                                                                                                                                                                                 |
| Swedish Inpatient Register [37]     | NA   | NA   | We used age <30 years at first hospitalization for diabetes (even if it preceded the start of cohort accrual) as an obligatory criterion                                                        | Age, sex, and calendar-period- matched general population from the entire Swedish inpatient registry                                                                                                                                                      |
| The Blue Mountains Eye Study [38]   | NA   | NA   | Diabetes was diagnosed from a self-reported positive physiciandiagnosis                                                                                                                         | Age, sex, and BMI                                                                                                                                                                                                                                         |
| Singapore Chinese Health Study [39] | 19.4 | NA   | Physician diagnosed                                                                                                                                                                             | Age at recruitment, sex, year of recruitment, dialect group, level of education, weekly vigorous work or strenuous sports, BMI, smoking status, total calcium intake from food and supplement, total soy isoflavone intake, and self-reported stroke.     |
| Meyer [40]                          | 16.9 | NA   | Nonfasting blood sample                                                                                                                                                                         | Age, height, BMI, physical activity, stroke, receipt of a disability pension, marriage, and smoking                                                                                                                                                       |
| Lipscombe [41]                      | NA   | NA   | Ontario Diabetes Database                                                                                                                                                                       | Age, chronic unstable disease, prior stroke, visual impairment, neuropathy, amputation, treatment with nitrates, statins, thiazides, estrogen, anticonvulsants, inhaled corticosteroids, and medications increasing falling risk, and history of BMD test |
| Melton [42]                         | NA   | NA   | Community medical records                                                                                                                                                                       | Age, BMI, calcaneal BMD, or a host of other osteoporosis risk factors                                                                                                                                                                                     |
| Bord-Trøndelag Health               | 30.4 | NA   | Blood sample drawn for analysis of HbA1                                                                                                                                                         | Age, BMI and daily smoking                                                                                                                                                                                                                                |

|    |              |      |      |                                                     |
|----|--------------|------|------|-----------------------------------------------------|
| 1  |              |      |      |                                                     |
| 2  |              |      |      |                                                     |
| 3  |              |      |      |                                                     |
| 4  | Survey [43]  |      |      |                                                     |
| 5  | Malmö        | NA   | NA   | Fasting blood glucose                               |
| 6  | Preventive   |      |      |                                                     |
| 7  | Project [44] |      |      |                                                     |
| 8  |              |      |      | Age, BMI, DBP, resting pulse rate,                  |
| 9  |              |      |      | triglyceride level, gamma-                          |
| 10 |              |      |      | glutamyltransferase, smoking, poor                  |
| 11 |              |      |      | self-rated health, sedimentation rate for           |
| 12 |              |      |      | women, and cholesterol or creatinine                |
| 13 | WHI [45]     | 6.2  | NA   | Participants with type 1 diabetes, defined as those |
| 14 |              |      |      | diagnosed before age 20 yr or who were ever         |
| 15 |              |      |      | Hospitalized for a diabetic coma                    |
| 16 |              |      |      |                                                     |
| 17 |              |      |      | Age; ethnicity; weight; height;                     |
| 18 |              |      |      | time-dependent history of falls;                    |
| 19 |              |      |      | previous fracture; history of                       |
| 20 |              |      |      | osteoporosis; trouble seeing at baseline;           |
| 21 |              |      |      | alcohol or tobacco use; calcium and                 |
| 22 |              |      |      | vitamin D intake; exercise;                         |
| 23 | Beslie [46]  | NA   | NA   | bisphosphonate, estrogen, steroid,                  |
| 24 |              |      |      | insulin, SERM, or thyroid hormone use               |
| 25 | Majumdar     | NA   | NA   | Age, sex, income quintile, area of                  |
| 26 | [47]         | 27.1 |      | residence and ethnicity                             |
| 27 |              |      |      | FRAX scores, burden of comorbidity,                 |
| 28 |              |      |      | falls, prescription osteoporosis                    |
| 29 | SOF [48]     | NA   | 26.2 | treatments, and insulin therapy                     |
| 30 |              |      |      | Interview                                           |
| 31 |              |      |      | Age, BMI, calcaneal BMD, height,                    |
| 32 |              |      |      | height loss since age 25, contrast                  |
| 33 |              |      |      | sensitivity, walking speed, consumed                |
| 34 |              |      |      | alcohol in past year, resting pulse,                |
| 35 |              |      |      | mother fractured hip, on feet < 4 h a day,          |
| 36 |              |      |      | use of long-acting benzodiazepines, and             |
| 37 |              |      |      | calcium intake                                      |
| 38 | Chen [49]    | NA   | NA   | Age as a continuous variable,                       |
| 39 |              |      |      | geographic area, and urbanization status            |
| 40 |              |      |      |                                                     |

\*BMI: body mass index; AAI: ankle-armindex; NA: not available; RA: rheumatoid arthritis; CCI: Charlson comorbidity index; WTHR: waist-to-hip ratio; SIMD: Scottish Index of Multiple Deprivation

S2 Table. Quality scores of prospective cohort studies using Newcastle-Ottawa Scale.

| Study                             | Selection                                |                                     |                             |                                                               | Comparability                                        | Outcome               |                             | NOS                     |               |
|-----------------------------------|------------------------------------------|-------------------------------------|-----------------------------|---------------------------------------------------------------|------------------------------------------------------|-----------------------|-----------------------------|-------------------------|---------------|
|                                   | Representativeness of the exposed cohort | Selection of the non exposed cohort | Ascertainment of DM disease | Demonstration that outcomes was not present at start of study | Comparability on the basis of the design or analysis | Assessment of outcome | Adequate follow-up duration | Adequate follow-up rate | Overall score |
| CHS [25]                          | 0                                        | 1                                   | 1                           | 1                                                             | 2                                                    | 1                     | 1                           | 1                       | 8             |
| Jung [26]                         | 0                                        | 1                                   | 1                           | 1                                                             | 2                                                    | 1                     | 0                           | 1                       | 7             |
| FRAILCO [27]                      | 1                                        | 1                                   | 1                           | 1                                                             | 2                                                    | 1                     | 0                           | 1                       | 8             |
| Dobnig [28]                       | 0                                        | 1                                   | 1                           | 1                                                             | 1                                                    | 1                     | 0                           | 1                       | 6             |
| H-EPESE [29]                      | 0                                        | 1                                   | 1                           | 1                                                             | 2                                                    | 1                     | 0                           | 1                       | 7             |
| IWHS [30]                         | 1                                        | 1                                   | 1                           | 1                                                             | 2                                                    | 1                     | 1                           | 1                       | 9             |
| SCI-DC [31]                       | 1                                        | 1                                   | 1                           | 1                                                             | 2                                                    | 1                     | 0                           | 0                       | 7             |
| SIDIAP [32]                       | 1                                        | 1                                   | 1                           | 1                                                             | 2                                                    | 1                     | 0                           | 1                       | 8             |
| THIN [33]                         | 1                                        | 1                                   | 1                           | 1                                                             | 1                                                    | 1                     | 0                           | 0                       | 6             |
| NHS [34]                          | 1                                        | 1                                   | 1                           | 1                                                             | 2                                                    | 1                     | 1                           | 1                       | 9             |
| The Rotterdam Study [35]          | 0                                        | 1                                   | 1                           | 1                                                             | 2                                                    | 1                     | 1                           | 1                       | 8             |
| The Tromsø study [36]             | 1                                        | 1                                   | 1                           | 1                                                             | 2                                                    | 1                     | 0                           | 1                       | 8             |
| Swedish Inpatient Register [37]   | 0                                        | 1                                   | 1                           | 1                                                             | 1                                                    | 1                     | 1                           | 0                       | 6             |
| The Blue Mountains Eye Study [38] | 0                                        | 1                                   | 1                           | 1                                                             | 2                                                    | 1                     | 0                           | 1                       | 7             |
| Singapore Chinese                 | 1                                        | 1                                   | 1                           | 1                                                             | 2                                                    | 1                     | 1                           | 1                       | 9             |

1  
2  
3  
4  
5  
6

Health Study [39]

|                                         |   |   |   |   |   |   |   |   |   |
|-----------------------------------------|---|---|---|---|---|---|---|---|---|
| 8 Meyer [40]                            | 1 | 1 | 1 | 1 | 2 | 1 | 1 | 1 | 9 |
| 9 Lipscombe [41]                        | 1 | 1 | 1 | 1 | 1 | 1 | 0 | 1 | 7 |
| 10 Melton [42]                          | 0 | 1 | 1 | 1 | 1 | 1 | 0 | 1 | 6 |
| 11 Nord-Trøndelag<br>Health Survey [43] | 1 | 1 | 1 | 1 | 2 | 1 | 1 | 1 | 9 |
| 14 Malmö Preventive<br>Project [44]     | 1 | 1 | 1 | 1 | 2 | 1 | 0 | 0 | 7 |
| 17 WHI [45]                             | 1 | 1 | 1 | 1 | 2 | 1 | 0 | 1 | 8 |
| 18 Leslie [46]                          | 1 | 1 | 1 | 1 | 2 | 1 | 1 | 1 | 9 |
| 19 Majumdar [47]                        | 1 | 1 | 1 | 1 | 2 | 1 | 0 | 1 | 8 |
| 20 SOF [48]                             | 1 | 1 | 1 | 1 | 2 | 1 | 1 | 1 | 9 |
| 22 Chen [49]                            | 1 | 1 | 1 | 1 | 2 | 1 | 0 | 1 | 8 |

23  
24  
25  
26  
27  
28  
29  
30  
31  
32  
33  
34  
35  
36  
37  
38  
39  
40  
41  
42  
43  
44  
45  
46  
47

For peer review only

S3 Table. Sensitivity analysis for total fractures

| <b>Excluding study</b>       | <b>RR and 95% CI</b> | <b>P value</b> | <b>Heterogeneity (%)</b> | <b>P value for heterogeneity</b> |
|------------------------------|----------------------|----------------|--------------------------|----------------------------------|
| Jung                         | 1.32 (1.17-1.50)     | <0.001         | 97.4                     | <0.001                           |
| FRAILCO                      | 1.36 (1.17-1.58)     | <0.001         | 96.9                     | <0.001                           |
| THIN                         | 1.25 (1.14-1.36)     | <0.001         | 91.7                     | <0.001                           |
| The Rotterdam Study          | 1.33 (1.17-1.51)     | <0.001         | 97.4                     | <0.001                           |
| The Tromsø study             | 1.31 (1.16-1.46)     | <0.001         | 97.4                     | <0.001                           |
| The Blue Mountains Eye Study | 1.29 (1.14-1.46)     | <0.001         | 97.4                     | <0.001                           |
| Melton                       | 1.32 (1.16-1.51)     | <0.001         | 97.2                     | <0.001                           |
| Malmö Preventive Project     | 1.26 (1.12-1.42)     | <0.001         | 97.2                     | <0.001                           |
| WHI                          | 1.32 (1.17-1.50)     | <0.001         | 97.4                     | <0.001                           |
| Leslie                       | 1.36 (1.19-1.56)     | <0.001         | 96.6                     | <0.001                           |
| Majumdar                     | 1.34 (1.18-1.53)     | <0.001         | 97.4                     | <0.001                           |
| SOF                          | 1.32 (1.16-1.49)     | <0.001         | 97.4                     | <0.001                           |

S4 Table. Sensitivity analysis for hip fracture

| Excluding study                | RR and 95% CI    | P value | Heterogeneity (%) | P value for heterogeneity |
|--------------------------------|------------------|---------|-------------------|---------------------------|
| CHS                            | 1.81 (1.58-2.06) | <0.001  | 98.1              | <0.001                    |
| Jung                           | 1.78 (1.57-2.03) | <0.001  | 98.1              | <0.001                    |
| FRAILCO                        | 1.83 (1.59-2.10) | <0.001  | 98.0              | <0.001                    |
| Dobnig                         | 1.81 (1.58-2.06) | <0.001  | 98.1              | <0.001                    |
| H-EPESE                        | 1.78 (1.56-2.03) | <0.001  | 98.1              | <0.001                    |
| IWHS                           | 1.76 (1.54-2.00) | <0.001  | 98.1              | <0.001                    |
| SCI-DC                         | 1.83 (1.59-2.11) | <0.001  | 97.9              | <0.001                    |
| SIDIAP                         | 1.81 (1.58-2.06) | <0.001  | 98.1              | <0.001                    |
| THIN                           | 1.73 (1.52-1.97) | <0.001  | 97.9              | <0.001                    |
| NHS                            | 1.74 (1.53-1.98) | <0.001  | 98.0              | <0.001                    |
| The Rotterdam Study            | 1.80 (1.58-2.05) | <0.001  | 98.1              | <0.001                    |
| The Tromsø study               | 1.75 (1.53-1.99) | <0.001  | 98.1              | <0.001                    |
| Swedish Inpatient Register     | 1.61 (1.44-1.80) | <0.001  | 97.1              | <0.001                    |
| The Blue Mountains Eye Study   | 1.77 (1.55-2.01) | <0.001  | 98.1              | <0.001                    |
| Singapore Chinese Health Study | 1.76 (1.54-2.00) | <0.001  | 98.0              | <0.001                    |
| Meyer                          | 1.72 (1.51-1.95) | <0.001  | 98.1              | <0.001                    |
| Lipscombe                      | 1.83 (1.58-2.13) | <0.001  | 97.9              | <0.001                    |
| Melton                         | 1.81 (1.59-2.07) | <0.001  | 98.1              | <0.001                    |
| Nord-Trøndelag Health Survey   | 1.78 (1.56-2.03) | <0.001  | 98.1              | <0.001                    |
| Malmö Preventive Project       | 1.70 (1.50-1.93) | <0.001  | 98.0              | <0.001                    |
| WHI                            | 1.77 (1.56-2.02) | <0.001  | 98.1              | <0.001                    |
| Leslie                         | 1.82 (1.59-2.09) | <0.001  | 98.1              | <0.001                    |
| Majumdar                       | 1.78 (1.56-2.04) | <0.001  | 98.1              | <0.001                    |
| SOF                            | 1.78 (1.56-2.02) | <0.001  | 98.1              | <0.001                    |
| Chen                           | 1.79 (1.56-2.05) | <0.001  | 97.5              | <0.001                    |

S5 Table. Sensitivity analysis for distal forearm fracture.

| <b>Excluding study</b>       | <b>RR and 95% CI</b> | <b>P value</b> | <b>Heterogeneity (%)</b> | <b>P value for heterogeneity</b> |
|------------------------------|----------------------|----------------|--------------------------|----------------------------------|
| Jung                         | 1.04 (0.87-1.23)     | 0.687          | 37.7                     | 0.141                            |
| FRAILCO                      | 1.13 (0.96-1.34)     | 0.139          | 0.0                      | 0.928                            |
| Dobnig                       | 1.02 (0.86-1.19)     | 0.849          | 33.1                     | 0.176                            |
| The Rotterdam Study          | 0.97 (0.84-1.12)     | 0.671          | 17.3                     | 0.298                            |
| The Blue Mountains Eye Study | 1.00 (0.87-1.16)     | 0.965          | 26.8                     | 0.224                            |
| Melton                       | 1.02 (0.85-1.22)     | 0.846          | 27.3                     | 0.220                            |
| WHI                          | 1.01 (0.86-1.18)     | 0.942          | 29.8                     | 0.201                            |
| SOF                          | 1.04 (0.86-1.24)     | 0.700          | 35.4                     | 0.158                            |



S6 Table. Sensitivity analysis for upper arm fracture

| <b>Excluding study</b>       | <b>RR and 95% CI</b> | <b>P value</b> | <b>Heterogeneity (%)</b> | <b>P value for heterogeneity</b> |
|------------------------------|----------------------|----------------|--------------------------|----------------------------------|
| FRAILCO                      | 1.59 (0.89-2.83)     | 0.116          | 85.1                     | <0.001                           |
| The Blue Mountains Eye Study | 1.31 (0.95-1.82)     | 0.100          | 83.2                     | <0.001                           |
| Melton                       | 1.40 (0.86-2.30)     | 0.178          | 83.3                     | <0.001                           |
| Malmö Preventive Project     | 1.73 (1.21-2.46)     | 0.003          | 82.8                     | <0.001                           |
| WHI                          | 1.56 (1.06-2.29)     | 0.025          | 87.6                     | <0.001                           |
| SOF                          | 1.36 (0.90-2.06)     | 0.142          | 86.2                     | <0.001                           |

For peer review only

S7 Table. Sensitivity analysis for ankle fracture

| <b>Excluding study</b>   | <b>RR and 95% CI</b> | <b>P value</b> | <b>Heterogeneity (%)</b> | <b>P value for heterogeneity</b> |
|--------------------------|----------------------|----------------|--------------------------|----------------------------------|
| FRAILCO                  | 1.42 (1.05-1.90)     | 0.021          | 2.2                      | 0.360                            |
| Malmö Preventive Project | 1.22 (1.08-1.38)     | 0.002          | 0.0                      | 0.958                            |
| WHI                      | 1.30 (1.03-1.63)     | 0.026          | 31.2                     | 0.234                            |
| SOF                      | 1.33 (1.02-1.73)     | 0.034          | 32.2                     | 0.229                            |

For peer review only

S8 Table. Sensitivity analysis for vertebrae fracture

| <b>Excluding study</b>   | <b>RR and 95% CI</b> | <b>P value</b> | <b>Heterogeneity (%)</b> | <b>P value for heterogeneity</b> |
|--------------------------|----------------------|----------------|--------------------------|----------------------------------|
| Jung                     | 1.74 (0.82-3.69)     | 0.148          | 96.5                     | <0.001                           |
| Dobnig                   | 1.72 (0.84-3.52)     | 0.140          | 93.5                     | <0.001                           |
| Melton                   | 1.20 (0.89-1.63)     | 0.233          | 52.6                     | 0.077                            |
| Malmö Preventive Project | 1.44 (0.65-3.17)     | 0.370          | 97.1                     | <0.001                           |
| WHI                      | 1.56 (0.72-3.35)     | 0.258          | 97.0                     | <0.001                           |
| SOF                      | 1.67 (0.77-3.63)     | 0.194          | 96.6                     | <0.001                           |

For peer review only

## Search strategy in PubMed:

| PubMed | Search strategy                                                                                                 |
|--------|-----------------------------------------------------------------------------------------------------------------|
| #1     | "Diabetes Mellitus"[Mesh]                                                                                       |
| #2     | diabetes OR diabetes mellitus OR type 2 diabetes mellitus OR type 1 diabetes mellitus OR glycaemia              |
| #3     | DM OR T2DM OR T1DM                                                                                              |
| #4     | #1 OR #2 OR #3                                                                                                  |
| #5     | "fracture"[Mesh]                                                                                                |
| #6     | fractures, spontaneous OR hip fractures OR osteoporotic fractures OR fractures, compression OR spinal fractures |
| #7     | #5 OR #6                                                                                                        |
| #8     | epidemiologic study OR cohort                                                                                   |
| #9     | #4 AND #7 AND #8                                                                                                |

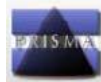

# PRISMA 2009 Checklist

| Section/topic                      | #  | Checklist item                                                                                                                                                                                                                                                                                              | Reported on page # |
|------------------------------------|----|-------------------------------------------------------------------------------------------------------------------------------------------------------------------------------------------------------------------------------------------------------------------------------------------------------------|--------------------|
| <b>TITLE</b>                       |    |                                                                                                                                                                                                                                                                                                             |                    |
| Title                              | 1  | Identify the report as a systematic review, meta-analysis, or both.                                                                                                                                                                                                                                         | 1                  |
| <b>ABSTRACT</b>                    |    |                                                                                                                                                                                                                                                                                                             |                    |
| Structured summary                 | 2  | Provide a structured summary including, as applicable: background; objectives; data sources; study eligibility criteria, participants, and interventions; study appraisal and synthesis methods; results; limitations; conclusions and implications of key findings; systematic review registration number. | 2                  |
| <b>INTRODUCTION</b>                |    |                                                                                                                                                                                                                                                                                                             |                    |
| Rationale                          | 3  | Describe the rationale for the review in the context of what is already known.                                                                                                                                                                                                                              | 4                  |
| Objectives                         | 4  | Provide an explicit statement of questions being addressed with reference to participants, interventions, comparisons, outcomes, and study design (PICOS).                                                                                                                                                  | 4-5                |
| <b>METHODS</b>                     |    |                                                                                                                                                                                                                                                                                                             |                    |
| Protocol and registration          | 5  | Indicate if a review protocol exists, if and where it can be accessed (e.g., Web address), and, if available, provide registration information including registration number.                                                                                                                               | None               |
| Eligibility criteria               | 6  | Specify study characteristics (e.g., PICOS, length of follow-up) and report characteristics (e.g., years considered, language, publication status) used as criteria for eligibility, giving rationale.                                                                                                      | 5                  |
| Information sources                | 7  | Describe all information sources (e.g., databases with dates of coverage, contact with study authors to identify additional studies) in the search and date last searched.                                                                                                                                  | 5                  |
| Search                             | 8  | Present full electronic search strategy for at least one database, including any limits used, such that it could be repeated.                                                                                                                                                                               | 5                  |
| Study selection                    | 9  | State the process for selecting studies (i.e., screening, eligibility, included in systematic review, and, if applicable, included in the meta-analysis).                                                                                                                                                   | 5                  |
| Data collection process            | 10 | Describe method of data extraction from reports (e.g., piloted forms, independently, in duplicate) and any processes for obtaining and confirming data from investigators.                                                                                                                                  | 5-6                |
| Data items                         | 11 | List and define all variables for which data were sought (e.g., PICOS, funding sources) and any assumptions and simplifications made.                                                                                                                                                                       | 6                  |
| Risk of bias in individual studies | 12 | Describe methods used for assessing risk of bias of individual studies (including specification of whether this was done at the study or outcome level), and how this information is to be used in any data synthesis.                                                                                      | 6                  |
| Summary measures                   | 13 | State the principal summary measures (e.g., risk ratio, difference in means).                                                                                                                                                                                                                               | 6                  |
| Synthesis of results               | 14 | Describe the methods of handling data and combining results of studies, if done, including measures of consistency (e.g., $I^2$ ) for each meta-analysis.                                                                                                                                                   | 6                  |

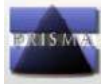

# PRISMA 2009 Checklist

| Section/topic                 | #  | Checklist item                                                                                                                                                                                           | Reported on page # |
|-------------------------------|----|----------------------------------------------------------------------------------------------------------------------------------------------------------------------------------------------------------|--------------------|
| Risk of bias across studies   | 15 | Specify any assessment of risk of bias that may affect the cumulative evidence (e.g., publication bias, selective reporting within studies).                                                             | 6                  |
| Additional analyses           | 16 | Describe methods of additional analyses (e.g., sensitivity or subgroup analyses, meta-regression), if done, indicating which were pre-specified.                                                         | 6                  |
| <b>RESULTS</b>                |    |                                                                                                                                                                                                          |                    |
| Study selection               | 17 | Give numbers of studies screened, assessed for eligibility, and included in the review, with reasons for exclusions at each stage, ideally with a flow diagram.                                          | 7                  |
| Study characteristics         | 18 | For each study, present characteristics for which data were extracted (e.g., study size, PICOS, follow-up period) and provide the citations.                                                             | 12                 |
| Risk of bias within studies   | 19 | Present data on risk of bias of each study and, if available, any outcome level assessment (see item 12).                                                                                                | 12                 |
| Results of individual studies | 20 | For all outcomes considered (benefits or harms), present, for each study: (a) simple summary data for each intervention group (b) effect estimates and confidence intervals, ideally with a forest plot. | 12-18              |
| Synthesis of results          | 21 | Present results of each meta-analysis done, including confidence intervals and measures of consistency.                                                                                                  | 12-18              |
| Risk of bias across studies   | 22 | Present results of any assessment of risk of bias across studies (see Item 15).                                                                                                                          | 12-18              |
| Additional analysis           | 23 | Give results of additional analyses, if done (e.g., sensitivity or subgroup analyses, meta-regression [see Item 16]).                                                                                    | 12-18              |
| <b>DISCUSSION</b>             |    |                                                                                                                                                                                                          |                    |
| Summary of evidence           | 24 | Summarize the main findings including the strength of evidence for each main outcome; consider their relevance to key groups (e.g., healthcare providers, users, and policy makers).                     | 18-20              |
| Limitations                   | 25 | Discuss limitations at study and outcome level (e.g., risk of bias), and at review-level (e.g., incomplete retrieval of identified research, reporting bias).                                            | 20                 |
| Conclusions                   | 26 | Provide a general interpretation of the results in the context of other evidence, and implications for future research.                                                                                  | 20                 |
| <b>FUNDING</b>                |    |                                                                                                                                                                                                          |                    |
| Funding                       | 27 | Describe sources of funding for the systematic review and other support (e.g., supply of data); role of funders for the systematic review.                                                               | 21                 |

From: Moher D, Liberati A, Tetzlaff J, Altman DG, The PRISMA Group (2009). Preferred Reporting Items for Systematic Reviews and Meta-Analyses: The PRISMA Statement. PLoS Med 6(6): e1000097. doi:10.1371/journal.pmed1000097

For more information, visit: [www.prisma-statement.org](http://www.prisma-statement.org).
