# Supplementary material for: Diabetes mellitus and the risk of fractures at specific sites: a meta-analysis
Source: PubMed Central journal article supplement — BMJ Open. 2019 Jan 3;9(1):e024067. doi: 10.1136/bmjopen-2018-024067 (PMC6326306; doi:10.1136/bmjopen-2018-024067), 2019-01-03
Supplement: bmjopen-2018-024067supp004.pdf [file bmjopen-2018-024067supp004.pdf]

S3 Table. Sensitivity analysis for total fractures

| <b>Excluding study</b>       | <b>RR and 95% CI</b> | <b>P value</b> | <b>Heterogeneity (%)</b> | <b>P value for heterogeneity</b> |
|------------------------------|----------------------|----------------|--------------------------|----------------------------------|
| Jung                         | 1.32 (1.17-1.50)     | <0.001         | 97.4                     | <0.001                           |
| FRAILCO                      | 1.36 (1.17-1.58)     | <0.001         | 96.9                     | <0.001                           |
| THIN                         | 1.25 (1.14-1.36)     | <0.001         | 91.7                     | <0.001                           |
| The Rotterdam Study          | 1.33 (1.17-1.51)     | <0.001         | 97.4                     | <0.001                           |
| The Tromsø study             | 1.31 (1.16-1.46)     | <0.001         | 97.4                     | <0.001                           |
| The Blue Mountains Eye Study | 1.29 (1.14-1.46)     | <0.001         | 97.4                     | <0.001                           |
| Melton                       | 1.32 (1.16-1.51)     | <0.001         | 97.2                     | <0.001                           |
| Malmö Preventive Project     | 1.26 (1.12-1.42)     | <0.001         | 97.2                     | <0.001                           |
| WHI                          | 1.32 (1.17-1.50)     | <0.001         | 97.4                     | <0.001                           |
| Leslie                       | 1.36 (1.19-1.56)     | <0.001         | 96.6                     | <0.001                           |
| Majumdar                     | 1.34 (1.18-1.53)     | <0.001         | 97.4                     | <0.001                           |
| SOF                          | 1.32 (1.16-1.49)     | <0.001         | 97.4                     | <0.001                           |
